# Supplementary material for: Identification of Sesame Genomic Variations from Genome Comparison of Landrace and Variety
Source: Front Plant Sci. 2016 Aug 3;7:1169. doi: 10.3389/fpls.2016.01169 (PMC4971434; doi:10.3389/fpls.2016.01169)
Supplement: Supplementary file 5 [file Table5.XLSX]

## Sheet: Table S5
Table S5 Gene annotation of 'Baizhima' and 'Mishuozhima' genome.
Sesame gene ID	Protein Lenth	Arabidopsis gene ID	Baizhima	Mishuozhima
SIN_1001207	194	NA	tarseq_4805_000002.gene16607	NA
SIN_1001208	125	NA	NA	tarseq_178_000001.gene676
SIN_1001209	287	NA	tarseq_4805_000002.gene16609	NA
SIN_1001210	129	NA	NA	NA
SIN_1001211	144	AT4G22920.1	tarseq_54149_000001.gene38257	NA
SIN_1001212	109	NA	NA	NA
SIN_1003176	613	NA	tarseq_1083_000001.gene3085	tarseq_1299_000002.gene6886
SIN_1003177	423	AT2G35930.1	tarseq_3843_000003.gene14506	tarseq_6020_000002.gene18302
SIN_1003178	513	AT2G35330.1	tarseq_3843_000003.gene14505	tarseq_6020_000002.gene18303
SIN_1003179	161	AT2G35330.2	NA	NA
SIN_1003180	834	AT1G05160.1	tarseq_3843_000002.gene14504	tarseq_6020_000002.gene18304
SIN_1003181	84	NA	tarseq_3843_000002.gene14503	tarseq_6020_000002.gene18305
SIN_1003182	493	AT5G46570.1	tarseq_3843_000002.gene14502	tarseq_6020_000002.gene18306
SIN_1003183	590	AT1G32450.1	tarseq_3843_000002.gene14501	tarseq_6020_000002.gene18307
SIN_1003184	448	AT2G44520.1	NA	NA
SIN_1003185	732	AT2G44530.1	tarseq_3843_000002.gene14499	tarseq_6020_000002.gene18308
SIN_1003186	715	AT5G27640.1	tarseq_3843_000002.gene14498	tarseq_6020_000002.gene18310
SIN_1003187	1441	AT1G08840.2	tarseq_3843_000002.gene14497	tarseq_6020_000002.gene18311
SIN_1003188	395	AT2G44580.1	tarseq_3843_000002.gene14496	tarseq_4176_000001.gene14531
SIN_1003189	614	AT1G02205.2	tarseq_3843_000001.gene14495	tarseq_4176_000001.gene14529
SIN_1003190	588	AT1G02205.3	tarseq_3843_000001.gene14494	tarseq_2238_000004.gene9734
SIN_1003191	258	AT3G20230.1	tarseq_3843_000001.gene14493	tarseq_2238_000004.gene9733
SIN_1003192	218	AT5G26667.1	tarseq_3843_000001.gene14492	tarseq_2238_000004.gene9732
SIN_1003193	434	AT1G80770.1	tarseq_3843_000001.gene14490	tarseq_2238_000004.gene9730
SIN_1003194	289	AT2G38740.1	tarseq_3843_000001.gene14489	tarseq_2238_000004.gene9729
SIN_1003195	620	AT3G60190.1	tarseq_3843_000001.gene14488	tarseq_2238_000004.gene9728
SIN_1003196	317	AT2G44600.1	tarseq_3843_000001.gene14487	tarseq_2238_000004.gene9727
SIN_1003197	357	AT1G44750.2	tarseq_3843_000001.gene14486	tarseq_2238_000004.gene9726
SIN_1003198	208	AT2G44610.1	tarseq_3843_000001.gene14485	tarseq_2238_000004.gene9725
SIN_1003199	128	AT3G49420.1	NA	NA
SIN_1003200	164	AT2G44620.1	NA	NA
SIN_1003201	167	AT5G46940.1	tarseq_3843_000001.gene14483	tarseq_2238_000004.gene9723
SIN_1003202	398	AT5G65960.1	tarseq_3843_000001.gene14482	tarseq_2238_000004.gene9722
SIN_1003203	469	AT2G44640.1	tarseq_3843_000001.gene14481	tarseq_2238_000004.gene9721
SIN_1003204	232	AT1G02180.1	NA	NA
SIN_1003205	364	AT3G60220.1	tarseq_3843_000001.gene14480	tarseq_2238_000004.gene9720
SIN_1003206	399	AT1G55460.1	tarseq_54155_000001.gene38261	tarseq_2238_000004.gene9719
SIN_1003207	178	AT5G51160.1	tarseq_10497_000007.gene25821	tarseq_2238_000004.gene9718
SIN_1003208	198	AT5G47030.1	tarseq_10497_000007.gene25820	tarseq_2238_000004.gene9717
SIN_1003209	101	NA	NA	NA
SIN_1003210	98	AT5G47060.1	tarseq_10497_000007.gene25819	tarseq_2238_000004.gene9716
SIN_1003211	811	AT5G01110.1	tarseq_10497_000007.gene25818	tarseq_2238_000004.gene9715
SIN_1003212	426	AT5G47070.1	tarseq_10497_000007.gene25817	tarseq_2238_000004.gene9714
SIN_1003213	2090	AT3G60240.4	tarseq_10497_000005.gene25812	tarseq_2238_000004.gene9710
SIN_1003214	137	NA	NA	NA
SIN_1003215	90	AT3G60245.1	NA	NA
SIN_1003216	238	AT4G17080.1	NA	NA
SIN_1003217	301	AT5G47080.1	tarseq_10497_000005.gene25809	tarseq_2238_000004.gene9707
SIN_1003218	569	AT5G24910.1	tarseq_10497_000005.gene25808	tarseq_2238_000004.gene9706
SIN_1003219	492	AT5G51160.1	tarseq_10497_000005.gene25807	tarseq_2238_000004.gene9705
SIN_1003220	158	NA	tarseq_10497_000005.gene25806	tarseq_2238_000004.gene9704
SIN_1003221	209	AT2G44740.1	tarseq_10497_000005.gene25805	tarseq_2238_000004.gene9703
SIN_1003222	651	AT1G02150.1	tarseq_10497_000003.gene25804	tarseq_2238_000002.gene9702
SIN_1003223	162	NA	tarseq_10497_000003.gene25803	tarseq_2238_000002.gene9701
SIN_1003224	176	AT3G06730.1	tarseq_10497_000003.gene25802	tarseq_2238_000002.gene9700
SIN_1003225	62	AT2G19750.1	tarseq_10497_000003.gene25801	tarseq_36_000002.gene149
SIN_1003226	745	AT5G23450.1	tarseq_10497_000002.gene25799	tarseq_2238_000002.gene9698
SIN_1003227	152	NA	tarseq_10497_000001.gene25798	tarseq_2238_000001.gene9697
SIN_1003228	436	AT3G26040.1	tarseq_53909_000001.gene38182	tarseq_2238_000001.gene9696
SIN_1003229	436	AT3G26040.1	tarseq_53903_000001.gene38180	tarseq_2238_000001.gene9695
SIN_1003230	442	AT3G26040.1	tarseq_9245_000001.gene24190	tarseq_2238_000001.gene9694
SIN_1003231	639	AT5G06970.1	tarseq_9245_000001.gene24189	tarseq_2238_000001.gene9693
SIN_1003232	146	AT5G06970.1	NA	NA
SIN_1003233	262	NA	NA	NA
SIN_1003234	601	AT3G12270.1	tarseq_9245_000001.gene24188	tarseq_2238_000001.gene9692
SIN_1003235	734	AT1G20160.2	tarseq_9245_000001.gene24187	tarseq_2238_000001.gene9691
SIN_1003236	1019	AT5G65750.1	tarseq_9245_000001.gene24186	tarseq_2238_000001.gene9690
SIN_1003237	1331	AT1G05490.1	tarseq_9245_000001.gene24185	tarseq_2238_000001.gene9689
SIN_1003238	405	AT3G15140.1	tarseq_9245_000001.gene24184	tarseq_2238_000001.gene9688
SIN_1003239	570	AT5G09860.1	tarseq_9245_000001.gene24183	tarseq_2238_000001.gene9687
SIN_1003240	72	AT3G12300.1	tarseq_9245_000001.gene24182	tarseq_2238_000001.gene9686
SIN_1003241	329	NA	NA	NA
SIN_1003242	591	AT2G16910.1	tarseq_9245_000001.gene24181	tarseq_2238_000001.gene9685
SIN_1003243	901	NA	tarseq_9245_000001.gene24180	tarseq_2238_000001.gene9684
SIN_1003244	228	AT5G07020.1	tarseq_9245_000001.gene24179	tarseq_2238_000001.gene9683
SIN_1003245	173	AT5G45140.1	NA	NA
SIN_1003246	761	AT5G45140.1	tarseq_9245_000001.gene24178	tarseq_2238_000001.gene9682
SIN_1003247	134	AT5G45140.1	NA	NA
SIN_1003248	351	AT5G16080.1	tarseq_9245_000001.gene24177	tarseq_2238_000001.gene9681
SIN_1003249	397	AT5G07050.1	tarseq_10472_000001.gene25755	tarseq_2238_000001.gene9680
SIN_1003250	510	AT2G38720.1	tarseq_10472_000001.gene25756	tarseq_2238_000001.gene9679
SIN_1003251	156	NA	tarseq_10472_000001.gene25757	tarseq_2238_000001.gene9678
SIN_1003252	50	AT3G12480.1	NA	NA
SIN_1003253	310	AT5G10970.1	tarseq_10472_000001.gene25758	tarseq_2238_000001.gene9677
SIN_1003254	207	AT2G38695.1	NA	NA
SIN_1003255	534	AT5G06100.1	NA	tarseq_2238_000001.gene9675
SIN_1003256	1062	AT5G06120.1	tarseq_10472_000001.gene25759	tarseq_2238_000001.gene9674
SIN_1003257	55	NA	NA	NA
SIN_1003258	435	AT5G04990.1	tarseq_10472_000003.gene25760	tarseq_1008_000001.gene5974
SIN_1003259	217	AT1G69490.1	tarseq_10472_000003.gene25762	tarseq_1008_000001.gene5972
SIN_1003260	547	AT5G04970.1	tarseq_10472_000003.gene25763	tarseq_1008_000001.gene5971
SIN_1003261	251	AT2G27050.1	NA	NA
SIN_1003262	93	NA	NA	NA
SIN_1008086	165	AT1G02145.3	NA	NA
SIN_1008087	133	AT4G27190.1	tarseq_13134_000001.gene29116	tarseq_9281_000001.gene23608
SIN_1008088	988	AT4G27190.1	tarseq_13134_000001.gene29115	tarseq_9281_000001.gene23607
SIN_1008089	109	NA	NA	tarseq_8100_000001.gene21883
SIN_1008090	985	AT4G27190.1	tarseq_3468_000001.gene13642	tarseq_1278_000001.gene6827
SIN_1008091	308	AT1G08315.1	tarseq_3468_000001.gene13641	tarseq_1278_000003.gene6829
SIN_1008092	330	AT3G54390.1	tarseq_3468_000001.gene13640	tarseq_249_000001.gene962
SIN_1008093	405	AT5G07030.1	tarseq_3468_000001.gene13639	tarseq_1278_000003.gene6831
SIN_1008094	444	AT3G54400.1	tarseq_3468_000001.gene13638	tarseq_1278_000003.gene6832
SIN_1008095	366	AT5G13500.1	tarseq_2871_000001.gene11613	tarseq_1278_000003.gene6833
SIN_1008096	777	AT3G07960.1	tarseq_3468_000001.gene13636	tarseq_1278_000003.gene6834
SIN_1008097	422	NA	tarseq_3468_000001.gene13635	tarseq_1278_000003.gene6835
SIN_1008098	1121	AT3G54440.1	tarseq_3468_000001.gene13634	tarseq_1278_000003.gene6836
SIN_1008099	1860	AT2G40030.1	tarseq_3468_000001.gene13633	tarseq_1278_000003.gene6837
SIN_1008100	277	AT2G40030.1	NA	NA
SIN_1008101	303	AT3G54450.1	tarseq_3468_000001.gene13632	tarseq_1278_000003.gene6838
SIN_1008102	1352	AT3G54460.1	tarseq_3468_000001.gene13631	tarseq_1278_000003.gene6839
SIN_1008103	157	AT3G57040.1	tarseq_3468_000001.gene13630	tarseq_1278_000003.gene6840
SIN_1008104	357	AT5G13480.2	NA	NA
SIN_1008105	316	AT5G13480.1	tarseq_3468_000001.gene13629	tarseq_1278_000003.gene6841
SIN_1008106	84	NA	NA	NA
SIN_1008107	238	AT5G59560.1	NA	NA
SIN_1008108	298	AT5G13810.1	tarseq_3468_000001.gene13628	tarseq_1278_000004.gene6842
SIN_1008109	369	AT3G07940.1	tarseq_3468_000001.gene13627	tarseq_1278_000004.gene6843
SIN_1008110	552	AT3G54470.1	tarseq_3468_000001.gene13626	tarseq_1278_000004.gene6844
SIN_1008111	413	AT3G07300.1	tarseq_3468_000001.gene13625	tarseq_1278_000004.gene6845
SIN_1008112	216	AT3G54490.1	tarseq_3468_000001.gene13624	tarseq_1278_000004.gene6846
SIN_1008113	434	AT3G63480.1	tarseq_3468_000001.gene13623	tarseq_1278_000004.gene6847
SIN_1008114	544	AT3G54500.2	tarseq_3468_000001.gene13622	tarseq_1278_000005.gene6848
SIN_1008115	88	NA	NA	NA
SIN_1008116	315	AT5G12380.1	tarseq_3468_000001.gene13621	tarseq_1278_000005.gene6849
SIN_1008117	313	AT2G38750.1	tarseq_3468_000001.gene13620	tarseq_1278_000005.gene6850
SIN_1008118	242	AT2G38760.1	tarseq_3468_000001.gene13619	tarseq_1278_000005.gene6851
SIN_1008119	715	AT3G54510.2	tarseq_3468_000001.gene13618	tarseq_1278_000005.gene6852
SIN_1008120	783	AT1G20780.1	tarseq_3468_000001.gene13617	tarseq_1278_000005.gene6853
SIN_1008121	149	AT5G23395.1	tarseq_3468_000001.gene13616	tarseq_1278_000005.gene6854
SIN_1008122	186	NA	tarseq_9509_000001.gene24539	tarseq_1971_000001.gene8876
SIN_1008123	549	AT2G38780.1	tarseq_9509_000001.gene24540	tarseq_1971_000001.gene8877
SIN_1008124	225	AT1G34570.1	tarseq_9509_000001.gene24541	tarseq_1971_000001.gene8878
SIN_1008125	352	AT1G29050.1	tarseq_9509_000001.gene24542	tarseq_1971_000001.gene8879
SIN_1008126	170	AT3G22560.1	NA	NA
SIN_1008127	438	AT1G64890.1	tarseq_9509_000001.gene24544	tarseq_1971_000001.gene8881
SIN_1008128	1047	AT5G63950.1	tarseq_18214_000001.gene35860	tarseq_1971_000001.gene8882
SIN_1008129	100	AT5G09270.1	tarseq_18214_000001.gene35859	tarseq_1971_000001.gene8883
SIN_1008130	657	AT5G63940.1	tarseq_18214_000001.gene35858	tarseq_1971_000001.gene8884
SIN_1008131	548	AT3G51930.1	tarseq_18214_000001.gene35856	tarseq_1971_000001.gene8885
SIN_1008132	461	AT3G08550.1	tarseq_3446_000001.gene13512	tarseq_1971_000001.gene8887
SIN_1008133	359	AT5G03990.1	tarseq_18214_000001.gene35854	tarseq_1971_000001.gene8888
SIN_1008134	422	AT1G74470.1	tarseq_18214_000001.gene35853	tarseq_1971_000001.gene8889
SIN_1008135	453	AT5G13460.1	tarseq_18214_000001.gene35852	tarseq_1971_000001.gene8890
SIN_1008136	66	NA	NA	NA
SIN_1008137	116	NA	NA	NA
SIN_1008138	443	AT3G63440.1	tarseq_11238_000001.gene26819	tarseq_1971_000001.gene8891
SIN_1008139	185	NA	tarseq_11238_000001.gene26820	tarseq_1971_000001.gene8892
SIN_1008140	466	AT2G41540.1	tarseq_11238_000001.gene26821	tarseq_1971_000001.gene8893
SIN_1008141	53	NA	NA	NA
SIN_1008142	152	NA	NA	NA
SIN_1008143	1126	AT3G63460.1	tarseq_11238_000001.gene26822	tarseq_1971_000001.gene8894
SIN_1008144	499	AT3G51990.1	tarseq_11238_000001.gene26823	tarseq_1971_000001.gene8895
SIN_1008145	307	NA	tarseq_2574_000001.gene10916	tarseq_1971_000001.gene8896
SIN_1008146	189	AT5G13780.1	tarseq_18190_000001.gene35783	tarseq_1971_000001.gene8897
SIN_1008147	460	AT5G13760.1	tarseq_18190_000001.gene35782	tarseq_1971_000001.gene8898
SIN_1008148	2059	AT3G24090.1	tarseq_18190_000001.gene35780	tarseq_1971_000001.gene8899
SIN_1008149	1343	AT3G14470.1	tarseq_18190_000001.gene35779	tarseq_1971_000001.gene8901
SIN_1008150	351	AT3G63490.1	tarseq_18190_000001.gene35777	tarseq_1971_000002.gene8903
SIN_1008151	1028	AT5G15920.1	tarseq_9658_000002.gene24679	tarseq_10806_000002.gene25506
SIN_1008152	439	AT5G13730.1	tarseq_9658_000002.gene24678	tarseq_10806_000002.gene25505
SIN_1008153	289	AT5G13720.1	tarseq_5474_000001.gene17999	tarseq_6301_000001.gene18890
SIN_1008154	321	AT5G19440.1	NA	NA
SIN_1008155	748	AT5G13690.1	tarseq_9658_000002.gene24676	tarseq_10806_000002.gene25503
SIN_1008156	157	AT3G15660.1	tarseq_3504_000002.gene13702	tarseq_12427_000001.gene27660
SIN_1008157	91	NA	tarseq_3504_000002.gene13703	tarseq_12427_000001.gene27659
SIN_1008158	396	AT5G13700.1	tarseq_3504_000002.gene13704	tarseq_12427_000001.gene27658
SIN_1008159	70	NA	NA	NA
SIN_1008160	355	AT5G13710.1	tarseq_54263_000001.gene38399	tarseq_14831_000001.gene31915
SIN_1008161	204	AT5G09680.1	tarseq_54263_000001.gene38400	tarseq_14831_000001.gene31916
SIN_1008162	369	AT3G08030.1	tarseq_54263_000001.gene38401	tarseq_14831_000001.gene31917
SIN_1008163	1141	AT3G14470.1	tarseq_54263_000001.gene38402	tarseq_14831_000001.gene31918
SIN_1008164	199	NA	tarseq_54263_000001.gene38403	tarseq_14831_000001.gene31919
SIN_1008165	168	AT5G08410.1	NA	NA
SIN_1008166	1383	AT3G23890.1	tarseq_54263_000001.gene38404	tarseq_14831_000001.gene31920
SIN_1008167	104	NA	NA	NA
SIN_1008168	1153	AT3G63500.2	tarseq_8277_000003.gene22707	tarseq_13564_000001.gene29352
SIN_1008169	278	AT5G55610.1	tarseq_8277_000003.gene22706	tarseq_13564_000001.gene29353
SIN_1008170	457	AT1G54730.2	tarseq_8277_000003.gene22705	tarseq_6747_000002.gene19688
SIN_1008171	500	AT3G61040.1	tarseq_8277_000002.gene22704	tarseq_13564_000001.gene29355
SIN_1008172	121	NA	NA	NA
SIN_1008173	365	AT3G21640.1	NA	NA
SIN_1008174	919	AT5G21080.1	tarseq_8277_000002.gene22703	tarseq_13564_000001.gene29356
SIN_1008175	848	AT3G08020.1	tarseq_8277_000002.gene22702	tarseq_13564_000001.gene29357
SIN_1008176	429	AT3G63510.1	tarseq_8277_000002.gene22700	tarseq_14723_000001.gene31587
SIN_1008177	117	AT2G37210.1	tarseq_8277_000002.gene22699	tarseq_14723_000001.gene31588
SIN_1008178	415	AT4G31770.1	tarseq_18271_000001.gene36052	tarseq_10938_000003.gene25707
SIN_1008179	93	NA	NA	NA
SIN_1008180	1066	AT5G05170.1	tarseq_11741_000002.gene27401	tarseq_10773_000002.gene25484
SIN_1008181	209	AT1G43890.1	tarseq_18271_000001.gene36049	tarseq_10938_000003.gene25710
SIN_1008182	732	AT2G41900.1	tarseq_7868_000001.gene22088	tarseq_6312_000001.gene18921
SIN_1008183	546	AT3G08040.1	tarseq_1681_000002.gene8011	tarseq_1619_000001.gene8021
SIN_1008184	180	NA	tarseq_7868_000001.gene22090	tarseq_6312_000001.gene18919
SIN_1008185	385	AT5G12870.1	tarseq_7868_000001.gene22091	tarseq_6312_000001.gene18918
SIN_1008186	253	AT5G13450.1	tarseq_7868_000002.gene22092	tarseq_6312_000001.gene18917
SIN_1008187	192	AT1G65870.1	tarseq_7868_000002.gene22093	tarseq_6312_000001.gene18916
SIN_1008188	1125	AT5G16850.1	tarseq_7868_000002.gene22094	tarseq_6312_000001.gene18915
SIN_1008189	67	NA	NA	NA
SIN_1008190	204	NA	tarseq_7868_000002.gene22095	NA
SIN_1008191	334	AT1G13810.1	tarseq_7868_000002.gene22096	tarseq_14712_000001.gene31548
SIN_1008192	248	AT3G63530.1	NA	NA
SIN_1008193	353	AT3G57670.1	tarseq_7868_000002.gene22097	tarseq_14712_000001.gene31549
SIN_1008194	439	AT3G13560.1	tarseq_7868_000002.gene22098	tarseq_14712_000001.gene31550
SIN_1008195	218	AT3G63540.1	tarseq_7868_000002.gene22099	tarseq_14712_000001.gene31551
SIN_1008196	351	AT3G08505.2	tarseq_7868_000002.gene22100	tarseq_14712_000001.gene31552
SIN_1008197	67	NA	NA	NA
SIN_1008198	101	NA	NA	NA
SIN_1008199	53	NA	NA	NA
SIN_1008200	82	NA	NA	NA
SIN_1008201	82	NA	NA	NA
SIN_1008202	61	NA	NA	NA
SIN_1008203	747	AT3G12640.1	tarseq_8116_000003.gene22454	tarseq_5492_000001.gene17436
SIN_1008204	169	AT1G51200.1	tarseq_8116_000003.gene22453	tarseq_5492_000001.gene17435
SIN_1008205	170	AT3G12630.1	tarseq_8116_000003.gene22452	tarseq_5492_000001.gene17434
SIN_1008206	484	AT5G08430.1	tarseq_8116_000003.gene22451	tarseq_5492_000001.gene17433
SIN_1008207	121	AT2G19740.1	tarseq_8116_000003.gene22450	tarseq_5492_000001.gene17432
SIN_1008208	695	AT3G52115.1	tarseq_8116_000003.gene22449	tarseq_5492_000001.gene17431
SIN_1008209	368	AT3G20820.1	tarseq_8116_000003.gene22448	tarseq_5492_000001.gene17430
SIN_1008210	415	AT3G52120.1	tarseq_8116_000003.gene22447	tarseq_5492_000001.gene17429
SIN_1008211	639	AT3G12160.1	tarseq_8116_000003.gene22446	tarseq_5492_000001.gene17428
SIN_1008212	520	AT5G48020.1	tarseq_8116_000003.gene22445	tarseq_5492_000001.gene17427
SIN_1008213	338	AT3G20820.1	tarseq_8116_000003.gene22444	tarseq_5492_000001.gene17426
SIN_1008214	1436	AT3G52140.1	tarseq_7658_000001.gene21675	tarseq_3585_000001.gene12948
SIN_1008215	290	AT3G48750.1	tarseq_8116_000003.gene22441	tarseq_5492_000001.gene17423
SIN_1008216	445	AT5G48030.1	tarseq_8116_000003.gene22440	tarseq_5492_000001.gene17422
SIN_1008217	329	AT5G06860.1	NA	NA
SIN_1008218	1102	AT1G29940.1	tarseq_8116_000003.gene22439	tarseq_5492_000001.gene17421
SIN_1008219	804	AT3G57880.1	tarseq_8116_000003.gene22438	tarseq_5492_000001.gene17420
SIN_1008220	260	AT3G52150.1	tarseq_8116_000003.gene22437	tarseq_5492_000001.gene17419
SIN_1008221	59	NA	NA	NA
SIN_1008222	56	NA	NA	NA
SIN_1008223	417	AT5G40850.1	tarseq_11847_000001.gene27502	tarseq_8742_000001.gene22887
SIN_1008224	540	AT2G44500.1	tarseq_11847_000001.gene27503	tarseq_8742_000001.gene22888
SIN_1008225	700	AT2G32850.2	NA	NA
SIN_1008226	806	AT5G60900.1	tarseq_11847_000001.gene27504	tarseq_8742_000001.gene22889
SIN_1008227	808	AT5G60900.1	tarseq_11847_000001.gene27505	tarseq_8742_000001.gene22890
SIN_1008228	406	AT5G13020.1	tarseq_11847_000001.gene27506	tarseq_8742_000001.gene22891
SIN_1008229	468	AT5G67030.1	tarseq_11847_000001.gene27507	tarseq_8742_000001.gene22892
SIN_1008230	820	AT5G67030.1	tarseq_11847_000001.gene27508	tarseq_8742_000001.gene22893
SIN_1008231	187	NA	tarseq_3193_000006.gene12694	tarseq_3902_000001.gene13971
SIN_1008232	184	NA	tarseq_11847_000001.gene27511	tarseq_8742_000001.gene22896
SIN_1008233	264	AT3G12130.1	tarseq_11847_000001.gene27512	tarseq_8742_000001.gene22897
SIN_1008234	402	AT5G06710.1	tarseq_11847_000001.gene27513	tarseq_8742_000001.gene22898
SIN_1008235	430	AT2G44410.1	tarseq_11847_000002.gene27514	tarseq_8742_000001.gene22899
SIN_1008236	339	AT2G27660.1	tarseq_11847_000002.gene27515	tarseq_8742_000001.gene22900
SIN_1008237	391	AT2G27660.1	tarseq_11847_000002.gene27516	tarseq_8742_000001.gene22901
SIN_1008238	191	AT2G44380.1	NA	NA
SIN_1008239	486	AT2G44380.1	tarseq_11847_000002.gene27517	tarseq_8742_000001.gene22902
SIN_1008240	197	AT2G44380.1	tarseq_54255_000001.gene38370	tarseq_476_000001.gene1733
SIN_1008241	247	AT2G28270.1	tarseq_54255_000001.gene38369	tarseq_476_000001.gene1732
SIN_1008242	1582	AT5G13000.1	tarseq_54255_000001.gene38368	tarseq_476_000001.gene1731
SIN_1008243	485	AT2G44350.1	tarseq_9937_000002.gene25057	tarseq_14811_000002.gene31848
SIN_1008244	372	AT2G31955.1	tarseq_9937_000002.gene25056	tarseq_14811_000002.gene31847
SIN_1008245	157	AT3G58000.1	tarseq_9937_000002.gene25055	tarseq_14811_000002.gene31846
SIN_1008246	93	NA	NA	NA
SIN_1008247	100	NA	tarseq_9937_000002.gene25054	tarseq_14811_000002.gene31845
SIN_1008248	293	AT3G60080.1	tarseq_9937_000002.gene25053	tarseq_14811_000002.gene31844
SIN_1008249	139	AT2G44310.1	tarseq_9937_000002.gene25052	tarseq_14811_000002.gene31843
SIN_1008250	115	AT5G19875.1	tarseq_9937_000002.gene25051	tarseq_14811_000002.gene31842
SIN_1008251	203	AT2G44290.1	NA	tarseq_14811_000002.gene31841
SIN_1008252	561	NA	tarseq_2329_000001.gene9904	tarseq_2364_000002.gene10100
SIN_1008253	641	AT3G57180.1	tarseq_9937_000002.gene25050	tarseq_14811_000001.gene31840
SIN_1008254	455	AT3G60070.1	tarseq_9937_000002.gene25049	tarseq_14811_000001.gene31839
SIN_1008255	313	AT3G58500.1	tarseq_9937_000002.gene25048	tarseq_14811_000001.gene31838
SIN_1008256	617	AT1G08760.1	tarseq_9937_000002.gene25047	tarseq_14811_000001.gene31837
SIN_1008257	430	AT1G05577.1	tarseq_9937_000002.gene25046	tarseq_14811_000001.gene31836
SIN_1008258	559	AT2G44260.1	tarseq_9937_000002.gene25045	tarseq_14811_000001.gene31835
SIN_1008259	584	AT1G05590.1	tarseq_9937_000002.gene25044	tarseq_10551_000002.gene25174
SIN_1008260	1607	AT2G31900.1	tarseq_9937_000002.gene25042	tarseq_10551_000002.gene25172
SIN_1008261	109	NA	NA	NA
SIN_1008262	538	AT3G03600.1	tarseq_18023_000001.gene35302	tarseq_14430_000001.gene30891
SIN_1008263	277	AT2G43030.1	tarseq_18023_000001.gene35304	tarseq_14430_000001.gene30890
SIN_1008264	723	AT1G19780.1	tarseq_18023_000001.gene35305	tarseq_14430_000001.gene30889
SIN_1008265	613	AT1G08540.1	tarseq_3843_000006.gene14532	tarseq_14833_000001.gene31939
SIN_1008266	327	AT5G17670.1	tarseq_3843_000006.gene14531	tarseq_14833_000001.gene31938
SIN_1008267	516	NA	tarseq_3843_000005.gene14527	tarseq_14833_000001.gene31934
SIN_1008268	424	AT1G64830.1	NA	NA
SIN_1008269	433	AT5G33340.1	tarseq_3843_000005.gene14526	tarseq_14833_000001.gene31933
SIN_1008270	784	AT3G03580.1	tarseq_3843_000005.gene14525	tarseq_14833_000001.gene31932
SIN_1008271	222	AT2G29490.1	tarseq_3843_000005.gene14524	tarseq_14833_000001.gene31931
SIN_1008272	382	AT3G48750.1	tarseq_3843_000005.gene14523	tarseq_14833_000001.gene31930
SIN_1008273	285	AT3G42960.1	tarseq_3843_000005.gene14522	tarseq_14833_000001.gene31929
SIN_1008274	107	AT5G17610.1	NA	NA
SIN_1008275	145	AT1G64850.1	tarseq_3843_000005.gene14519	tarseq_14833_000001.gene31926
SIN_1008276	491	AT5G17580.1	tarseq_3843_000005.gene14518	tarseq_14833_000001.gene31925
SIN_1008277	664	AT5G27740.1	tarseq_3843_000005.gene14517	tarseq_6020_000001.gene18292
SIN_1008278	73	NA	NA	NA
SIN_1008279	356	AT1G32170.1	tarseq_3843_000005.gene14516	tarseq_6020_000001.gene18293
SIN_1008280	523	AT3G03530.1	tarseq_3843_000005.gene14515	tarseq_6020_000001.gene18294
SIN_1008281	512	AT3G03520.1	tarseq_3843_000005.gene14514	tarseq_6020_000001.gene18295
SIN_1008282	340	AT5G17600.1	tarseq_3843_000005.gene14513	tarseq_6020_000001.gene18296
SIN_1008283	331	AT3G03560.1	tarseq_3843_000005.gene14512	tarseq_6020_000001.gene18297
SIN_1008284	289	AT1G80930.1	tarseq_3843_000005.gene14511	tarseq_6020_000001.gene18298
SIN_1008285	279	AT4G17800.1	tarseq_3843_000005.gene14510	tarseq_6020_000002.gene18299
SIN_1008286	287	AT5G48670.1	tarseq_3843_000005.gene14509	tarseq_6020_000002.gene18300
SIN_1009414	289	NA	tarseq_16233_000002.gene32880	tarseq_12506_000001.gene27749
SIN_1009415	463	AT1G69170.1	tarseq_16233_000002.gene32881	tarseq_12506_000001.gene27750
SIN_1009416	106	NA	NA	NA
SIN_1009417	1160	AT1G26330.2	tarseq_16233_000002.gene32883	tarseq_12506_000001.gene27752
SIN_1009418	356	AT3G08900.1	tarseq_16233_000002.gene32884	tarseq_12506_000001.gene27753
SIN_1009419	172	AT1G13690.1	tarseq_16233_000002.gene32885	tarseq_12506_000001.gene27754
SIN_1009420	302	AT5G60850.1	tarseq_14700_000001.gene31037	tarseq_1039_000001.gene6046
SIN_1009421	302	AT1G69030.1	tarseq_14700_000001.gene31035	tarseq_1039_000001.gene6047
SIN_1009422	505	AT5G15740.1	tarseq_14700_000001.gene31034	tarseq_1039_000001.gene6049
SIN_1009423	479	AT5G08130.2	tarseq_14700_000001.gene31033	tarseq_1039_000001.gene6050
SIN_1009424	672	AT3G05670.1	tarseq_1527_000002.gene7470	tarseq_1039_000001.gene6051
SIN_1009425	171	AT3G54040.1	NA	NA
SIN_1009426	922	AT3G42660.1	tarseq_998_000001.gene2737	tarseq_1039_000001.gene6053
SIN_1009427	56	NA	tarseq_1527_000002.gene7467	tarseq_1039_000001.gene6054
SIN_1009428	383	AT5G23060.1	tarseq_7686_000001.gene21740	tarseq_7865_000001.gene21616
SIN_1009429	365	AT5G51810.1	tarseq_7686_000001.gene21741	tarseq_7865_000001.gene21617
SIN_1009430	228	AT2G13570.1	tarseq_54170_000001.gene38272	tarseq_8263_000002.gene22180
SIN_1009431	817	AT5G64030.1	tarseq_5708_000001.gene18516	tarseq_8263_000002.gene22179
SIN_1009432	387	AT2G35930.1	tarseq_5708_000001.gene18517	tarseq_8263_000002.gene22178
SIN_1009433	167	AT1G73230.1	tarseq_5708_000002.gene18518	tarseq_8263_000002.gene22177
SIN_1009434	167	AT1G17880.1	tarseq_5708_000003.gene18519	tarseq_8263_000002.gene22176
SIN_1009435	1021	AT4G10770.1	tarseq_5708_000003.gene18520	tarseq_8263_000002.gene22174
SIN_1009436	755	AT4G19380.1	tarseq_5708_000003.gene18522	tarseq_8263_000002.gene22173
SIN_1009437	157	AT2G17850.1	tarseq_5708_000003.gene18523	tarseq_6148_000002.gene18589
SIN_1009438	1174	AT2G17820.1	tarseq_5708_000003.gene18524	tarseq_8263_000002.gene22171
SIN_1009439	255	AT4G35000.1	tarseq_5708_000003.gene18525	tarseq_8263_000002.gene22170
SIN_1009440	986	AT5G66130.1	tarseq_3237_000001.gene12868	tarseq_8263_000002.gene22168
SIN_1009441	197	AT2G17800.1	tarseq_3237_000001.gene12869	tarseq_8263_000002.gene22167
SIN_1009442	243	AT4G35840.1	tarseq_3237_000001.gene12870	tarseq_8263_000002.gene22166
SIN_1009443	126	AT4G35770.1	NA	NA
SIN_1009444	295	AT5G66060.1	tarseq_3237_000001.gene12871	tarseq_8263_000002.gene22165
SIN_1009445	781	AT1G16380.1	tarseq_3237_000001.gene12874	tarseq_8263_000002.gene22163
SIN_1009446	499	AT5G66055.1	tarseq_3237_000001.gene12876	tarseq_8263_000002.gene22161
SIN_1009447	195	AT4G35785.1	tarseq_3237_000001.gene12877	tarseq_8263_000002.gene22160
SIN_1009448	898	AT5G66030.1	tarseq_3237_000001.gene12878	tarseq_8263_000002.gene22159
SIN_1009449	433	AT2G17630.1	tarseq_3237_000001.gene12879	tarseq_573_000004.gene1965
SIN_1009450	674	AT2G17580.1	tarseq_9261_000002.gene24210	tarseq_8263_000002.gene22157
SIN_1009451	544	AT2G17200.1	tarseq_9261_000002.gene24209	tarseq_8263_000002.gene22156
SIN_1009452	80	AT5G66020.1	NA	NA
SIN_1009453	71	NA	NA	NA
SIN_1009454	403	AT3G51460.1	tarseq_9261_000002.gene24207	tarseq_8263_000001.gene22154
SIN_1009455	284	AT2G17570.1	tarseq_9261_000002.gene24206	tarseq_8263_000001.gene22153
SIN_1009456	675	AT1G53730.1	tarseq_10949_000002.gene26514	tarseq_4471_000007.gene15248
SIN_1009457	426	AT1G53750.1	tarseq_10949_000002.gene26515	tarseq_4471_000007.gene15249
SIN_1009458	577	AT5G50420.1	tarseq_10949_000002.gene26516	tarseq_4471_000007.gene15250
SIN_1009459	607	AT1G53800.1	tarseq_8852_000001.gene23452	tarseq_3774_000001.gene13533
SIN_1009460	297	AT1G53820.1	tarseq_10949_000002.gene26518	tarseq_4471_000007.gene15252
SIN_1009461	421	AT1G17280.1	tarseq_10949_000002.gene26519	tarseq_4471_000007.gene15253
SIN_1009462	282	AT5G59560.1	tarseq_10949_000002.gene26520	tarseq_4471_000007.gene15254
SIN_1009463	74	NA	NA	NA
SIN_1009464	98	NA	tarseq_252_000002.gene795	tarseq_1088_000001.gene6171
SIN_1009465	569	AT1G53840.1	tarseq_4564_000001.gene16114	tarseq_10610_000002.gene25207
SIN_1009466	542	AT1G72330.1	NA	tarseq_10610_000003.gene25208
SIN_1009467	2053	AT3G14270.1	tarseq_4564_000001.gene16113	tarseq_10610_000003.gene25209
SIN_1009468	203	AT3G14260.1	tarseq_4564_000001.gene16112	tarseq_10610_000003.gene25210
SIN_1009469	358	AT1G72340.1	tarseq_4564_000001.gene16111	tarseq_10610_000003.gene25211
SIN_1009470	166	AT1G53885.1	NA	NA
SIN_1009471	391	AT1G53910.3	tarseq_4564_000001.gene16110	tarseq_10610_000003.gene25212
SIN_1009472	217	AT3G14200.1	tarseq_13768_000001.gene29876	tarseq_14673_000001.gene31439
SIN_1009473	125	NA	NA	NA
SIN_1009474	1392	AT3G14172.2	tarseq_13768_000001.gene29875	tarseq_14673_000003.gene31440
SIN_1009475	530	AT3G14170.1	NA	tarseq_11492_000001.gene26453
SIN_1009476	147	NA	tarseq_13768_000001.gene29874	tarseq_11492_000001.gene26452
SIN_1009477	167	AT1G11890.1	NA	NA
SIN_1009478	1064	AT3G14120.2	tarseq_13768_000001.gene29872	tarseq_11492_000001.gene26450
SIN_1009479	286	NA	tarseq_7818_000001.gene21918	tarseq_11388_000001.gene26291
SIN_1009480	674	AT3G42880.1	tarseq_7818_000001.gene21919	tarseq_13153_000001.gene28698
SIN_1009481	678	AT3G14090.1	tarseq_217_000005.gene715	tarseq_4277_000002.gene14830
SIN_1009482	510	AT1G72480.1	tarseq_7818_000001.gene21921	tarseq_13153_000001.gene28700
SIN_1009483	114	AT3G14080.1	tarseq_7818_000001.gene21922	tarseq_13153_000001.gene28701
SIN_1009484	285	AT1G72490.1	tarseq_7818_000001.gene21923	tarseq_13153_000001.gene28702
SIN_1009485	656	AT3G14075.1	tarseq_7818_000001.gene21924	tarseq_13153_000001.gene28703
SIN_1009486	174	AT1G72510.1	tarseq_7818_000002.gene21925	tarseq_13153_000002.gene28704
SIN_1009487	507	AT5G07990.1	tarseq_6389_000001.gene19822	tarseq_7074_000001.gene20326
SIN_1009488	991	AT1G72560.1	tarseq_6389_000001.gene19821	tarseq_7074_000001.gene20325
SIN_1009489	716	AT1G54130.1	tarseq_6389_000001.gene19820	tarseq_7074_000001.gene20324
SIN_1009490	480	AT4G16110.1	tarseq_11540_000001.gene27259	tarseq_2370_000003.gene10111
SIN_1009491	392	AT4G08940.1	tarseq_11540_000001.gene27256	tarseq_2370_000001.gene10109
SIN_1009492	115	AT1G17455.1	tarseq_11540_000001.gene27255	tarseq_2370_000001.gene10108
SIN_1009493	306	AT1G72640.1	tarseq_11540_000001.gene27254	tarseq_2370_000001.gene10107
SIN_1009494	602	AT1G72650.1	tarseq_11540_000001.gene27253	tarseq_2370_000001.gene10106
SIN_1009495	441	AT1G72660.1	tarseq_11540_000001.gene27252	tarseq_2370_000001.gene10105
SIN_1009496	429	AT1G54200.1	tarseq_11540_000001.gene27251	tarseq_2370_000001.gene10104
SIN_1009497	371	AT3G14000.1	tarseq_6860_000001.gene20574	tarseq_7420_000001.gene20929
SIN_1009498	665	AT5G13640.1	tarseq_6860_000001.gene20575	tarseq_7420_000001.gene20928
SIN_1009499	675	AT3G14010.1	tarseq_6860_000002.gene20576	tarseq_10463_000001.gene25082
SIN_1009500	250	AT5G20510.1	tarseq_6860_000002.gene20577	tarseq_10463_000001.gene25083
SIN_1009501	103	NA	tarseq_6860_000002.gene20578	tarseq_10463_000001.gene25084
SIN_1009502	73	NA	NA	NA
SIN_1009503	543	AT1G72770.1	tarseq_6860_000002.gene20579	tarseq_10463_000001.gene25085
SIN_1009504	781	AT5G26150.1	tarseq_6860_000002.gene20580	tarseq_10463_000001.gene25086
SIN_1009505	191	AT1G17530.1	tarseq_3155_000001.gene12413	tarseq_3549_000001.gene12894
SIN_1009506	432	AT5G57020.1	tarseq_6860_000002.gene20583	tarseq_10463_000001.gene25089
SIN_1009507	413	AT3G13920.1	tarseq_6860_000002.gene20584	tarseq_10463_000001.gene25090
SIN_1009508	88	NA	tarseq_6860_000002.gene20585	tarseq_10463_000001.gene25091
SIN_1009509	461	AT1G72710.1	tarseq_6860_000002.gene20586	tarseq_10463_000001.gene25092
SIN_1009510	1231	AT1G17500.1	tarseq_6860_000002.gene20587	tarseq_10463_000001.gene25093
SIN_1009511	196	AT4G08520.1	tarseq_8176_000001.gene22544	tarseq_9010_000001.gene23203
SIN_1009512	87	NA	tarseq_8176_000001.gene22545	tarseq_9010_000001.gene23204
SIN_1009513	439	AT1G72670.1	tarseq_2524_000002.gene10645	tarseq_4612_000001.gene15555
SIN_1009514	241	AT3G13890.2	NA	NA
SIN_1009515	150	AT3G13882.1	tarseq_8176_000001.gene22549	tarseq_9010_000001.gene23208
SIN_1009516	408	AT1G72880.2	tarseq_8176_000001.gene22550	tarseq_9010_000001.gene23209
SIN_1009517	271	AT1G17650.1	tarseq_8176_000002.gene22551	tarseq_9010_000002.gene23210
SIN_1009518	311	AT3G13780.1	tarseq_8176_000002.gene22552	tarseq_9010_000002.gene23211
SIN_1009519	72	NA	NA	NA
SIN_1009520	273	AT3G13850.1	tarseq_8176_000002.gene22553	tarseq_9010_000002.gene23212
SIN_1009521	255	AT1G17620.1	tarseq_8176_000002.gene22554	tarseq_9010_000002.gene23213
SIN_1009522	571	AT1G72970.1	tarseq_8176_000002.gene22555	tarseq_10767_000003.gene25475
SIN_1009523	772	AT3G13870.2	tarseq_8176_000002.gene22556	tarseq_10767_000003.gene25474
SIN_1009524	467	AT2G19520.1	tarseq_8176_000002.gene22557	tarseq_10767_000003.gene25473
SIN_1009525	601	AT3G13772.1	tarseq_8176_000002.gene22558	tarseq_10767_000003.gene25472
SIN_1009526	842	AT3G13750.1	tarseq_8176_000002.gene22559	tarseq_10767_000003.gene25471
SIN_1009527	249	AT1G55170.1	tarseq_8176_000002.gene22560	tarseq_10767_000003.gene25470
SIN_1009528	143	AT2G19730.1	tarseq_8176_000002.gene22561	tarseq_10767_000003.gene25469
SIN_1009529	517	AT1G17720.2	tarseq_8176_000002.gene22562	tarseq_10767_000002.gene25468
SIN_1009530	236	AT1G51700.1	tarseq_8176_000002.gene22563	tarseq_10767_000002.gene25467
SIN_1009531	732	AT3G13690.1	tarseq_8176_000003.gene22564	tarseq_10767_000001.gene25466
SIN_1009532	709	AT3G21295.1	tarseq_8176_000003.gene22565	tarseq_10767_000001.gene25465
SIN_1009533	200	AT1G73040.1	NA	NA
SIN_1009534	685	AT1G73040.1	tarseq_8176_000003.gene22566	tarseq_10767_000001.gene25464
SIN_1009535	424	AT5G11730.1	tarseq_8176_000003.gene22567	tarseq_10767_000001.gene25463
SIN_1009536	756	AT2G25930.1	tarseq_8176_000003.gene22568	tarseq_10767_000001.gene25462
SIN_1009537	372	AT3G21330.1	NA	NA
SIN_1009538	307	AT2G04220.1	tarseq_8176_000003.gene22569	tarseq_10767_000001.gene25461
SIN_1009539	625	AT1G52080.1	tarseq_8176_000003.gene22570	tarseq_10767_000001.gene25460
SIN_1009540	216	AT1G48120.1	NA	NA
SIN_1009541	393	AT3G16490.1	tarseq_8872_000001.gene23478	tarseq_13220_000001.gene28814
SIN_1009542	757	AT4G32850.5	tarseq_14169_000001.gene30388	tarseq_13220_000001.gene28815
SIN_1009543	521	AT4G29130.1	tarseq_14169_000001.gene30389	tarseq_13220_000001.gene28816
SIN_1009544	331	AT3G16500.1	tarseq_14169_000001.gene30390	tarseq_13220_000001.gene28817
SIN_1009545	625	AT3G59780.1	tarseq_14169_000001.gene30391	tarseq_13220_000001.gene28818
SIN_1009546	698	AT1G79730.1	tarseq_14169_000001.gene30392	tarseq_13220_000001.gene28819
SIN_1009547	99	AT3G16360.2	NA	NA
SIN_1009548	691	AT1G79750.1	tarseq_14169_000001.gene30394	tarseq_13220_000001.gene28821
SIN_1009549	170	AT3G08890.1	NA	tarseq_12715_000001.gene28019
SIN_1009550	1453	AT1G59870.1	tarseq_11097_000003.gene26664	tarseq_11628_000001.gene26558
SIN_1009551	181	AT1G52140.1	tarseq_11097_000002.gene26663	tarseq_11628_000001.gene26557
SIN_1009552	184	NA	tarseq_11097_000001.gene26662	tarseq_11628_000001.gene26556
SIN_1009553	823	AT1G52150.1	tarseq_3059_000003.gene12151	tarseq_2208_000001.gene9554
SIN_1009554	361	AT2G30050.1	tarseq_11097_000001.gene26660	tarseq_13943_000001.gene29986
SIN_1009555	70	NA	NA	NA
SIN_1009556	978	AT3G16290.1	tarseq_11097_000001.gene26659	tarseq_13943_000001.gene29987
SIN_1009557	225	AT5G11590.1	tarseq_11097_000001.gene26658	tarseq_13943_000001.gene29988
SIN_1009558	238	AT3G16240.1	tarseq_2398_000003.gene10077	tarseq_1917_000001.gene8708
SIN_1009559	80	NA	NA	NA
SIN_1009560	443	AT3G16200.1	tarseq_15521_000001.gene31996	tarseq_14752_000001.gene31661
SIN_1009561	227	AT3G27750.1	NA	NA
SIN_1009562	350	AT1G79810.1	tarseq_15521_000001.gene31995	tarseq_14752_000001.gene31660
SIN_1009563	340	AT4G29100.1	tarseq_824_000001.gene2259	tarseq_2333_000001.gene9963
SIN_1009564	181	AT3G16190.1	NA	NA
SIN_1009565	194	AT3G16190.1	tarseq_824_000001.gene2260	tarseq_2333_000002.gene9964
SIN_1009566	972	AT1G79830.1	tarseq_824_000001.gene2261	tarseq_2333_000002.gene9965
SIN_1009567	143	AT1G52220.1	tarseq_824_000001.gene2262	tarseq_2333_000002.gene9966
SIN_1009568	140	AT3G16140.1	tarseq_824_000001.gene2263	tarseq_2333_000002.gene9967
SIN_1009569	531	AT1G79860.1	tarseq_824_000001.gene2264	tarseq_2333_000002.gene9968
SIN_1009570	313	AT1G79870.1	tarseq_824_000001.gene2265	tarseq_2333_000002.gene9969
SIN_1009571	98	AT1G52240.2	NA	NA
SIN_1009572	137	NA	NA	NA
SIN_1009573	95	AT3G16080.1	NA	NA
SIN_1009574	131	NA	tarseq_824_000001.gene2268	tarseq_2333_000002.gene9972
SIN_1009575	395	AT3G16050.1	tarseq_824_000001.gene2269	tarseq_2333_000002.gene9973
SIN_1009576	261	AT5G37590.1	tarseq_824_000001.gene2270	tarseq_2333_000002.gene9974
SIN_1009577	264	AT5G37590.1	NA	NA
SIN_1009578	702	AT3G16060.1	tarseq_824_000001.gene2271	tarseq_2333_000002.gene9975
SIN_1009579	50	NA	NA	NA
SIN_1009580	215	AT4G13270.1	tarseq_824_000001.gene2274	tarseq_2333_000002.gene9978
SIN_1009581	89	NA	NA	NA
SIN_1009582	262	NA	tarseq_824_000001.gene2275	tarseq_2333_000002.gene9979
SIN_1009583	856	AT1G79930.1	tarseq_824_000001.gene2276	tarseq_6067_000001.gene18380
SIN_1009584	371	AT3G24490.1	tarseq_824_000001.gene2277	tarseq_6067_000001.gene18379
SIN_1009585	722	AT3G16000.1	tarseq_824_000001.gene2278	tarseq_6067_000001.gene18378
SIN_1009586	116	NA	NA	NA
SIN_1009587	152	AT1G79990.1	NA	NA
SIN_1009588	697	AT3G15990.1	tarseq_824_000001.gene2279	tarseq_749_000001.gene5063
SIN_1009589	900	AT1G52360.1	tarseq_824_000001.gene2280	tarseq_749_000001.gene5064
SIN_1009590	447	AT1G52380.1	tarseq_824_000001.gene2281	tarseq_749_000001.gene5065
SIN_1009591	638	AT1G80000.1	tarseq_824_000001.gene2282	tarseq_749_000001.gene5066
SIN_1009592	170	AT3G15540.1	tarseq_824_000001.gene2283	tarseq_749_000001.gene5067
SIN_1009593	61	AT4G14550.1	NA	NA
SIN_1009594	277	AT1G64980.1	tarseq_824_000001.gene2285	tarseq_749_000001.gene5069
SIN_1009595	394	AT1G80360.1	tarseq_824_000001.gene2286	tarseq_749_000001.gene5070
SIN_1009596	214	AT1G15550.1	tarseq_824_000001.gene2287	tarseq_749_000001.gene5071
SIN_1009597	371	AT1G15550.1	tarseq_824_000001.gene2288	tarseq_749_000001.gene5072
SIN_1009598	240	AT1G20575.1	tarseq_824_000001.gene2289	tarseq_749_000001.gene5073
SIN_1009599	467	AT1G80310.1	tarseq_824_000001.gene2290	tarseq_749_000001.gene5074
SIN_1009600	401	AT3G15570.1	tarseq_824_000001.gene2291	tarseq_749_000001.gene5075
SIN_1009601	630	AT1G80300.1	tarseq_824_000001.gene2292	tarseq_749_000001.gene5076
SIN_1009602	176	AT4G32530.1	tarseq_824_000001.gene2293	tarseq_749_000002.gene5077
SIN_1009603	634	AT1G80280.1	tarseq_824_000001.gene2294	tarseq_749_000002.gene5078
SIN_1009604	417	AT5G19990.1	tarseq_824_000001.gene2296	tarseq_749_000002.gene5080
SIN_1009605	674	AT1G15460.1	tarseq_8620_000001.gene23144	tarseq_749_000002.gene5081
SIN_1009606	92	NA	tarseq_8620_000001.gene23143	tarseq_749_000002.gene5082
SIN_1009607	309	AT5G11420.1	tarseq_8620_000001.gene23142	tarseq_749_000002.gene5083
SIN_1009608	321	AT5G40810.1	tarseq_8620_000001.gene23141	tarseq_749_000002.gene5084
SIN_1009609	279	AT1G80230.1	tarseq_8620_000001.gene23140	tarseq_749_000002.gene5085
SIN_1009610	446	AT1G68140.1	tarseq_8620_000001.gene23139	tarseq_749_000002.gene5086
SIN_1009611	444	AT1G80210.1	tarseq_8620_000001.gene23138	tarseq_749_000002.gene5087
SIN_1009612	294	AT1G15410.1	tarseq_8620_000001.gene23136	tarseq_749_000002.gene5089
SIN_1009613	1044	NA	tarseq_8620_000001.gene23135	tarseq_749_000002.gene5090
SIN_1009614	123	AT1G80180.1	NA	NA
SIN_1009615	454	AT1G80170.1	tarseq_8620_000001.gene23134	tarseq_749_000002.gene5091
SIN_1009616	120	AT2G34160.1	tarseq_8620_000001.gene23133	tarseq_749_000002.gene5092
SIN_1009617	98	NA	NA	NA
SIN_1009618	767	AT1G52620.1	tarseq_14168_000001.gene30375	tarseq_8961_000001.gene23121
SIN_1009619	411	AT1G80150.1	tarseq_14168_000001.gene30376	tarseq_8961_000001.gene23122
SIN_1009620	602	AT5G11200.1	tarseq_14168_000001.gene30377	tarseq_8961_000001.gene23123
SIN_1009621	187	AT1G15360.1	tarseq_14168_000001.gene30378	tarseq_8961_000001.gene23124
SIN_1009622	807	AT1G52570.1	tarseq_14168_000001.gene30379	tarseq_8961_000001.gene23125
SIN_1009623	139	NA	tarseq_14168_000001.gene30380	tarseq_8961_000001.gene23126
SIN_1009624	214	AT5G25360.1	NA	NA
SIN_1009625	227	AT1G52560.1	tarseq_14168_000001.gene30381	tarseq_8961_000001.gene23127
SIN_1009626	431	AT1G80130.1	tarseq_14168_000001.gene30382	tarseq_8961_000001.gene23128
SIN_1009627	318	AT3G15790.1	NA	NA
SIN_1009628	382	AT3G15800.1	tarseq_14168_000001.gene30383	tarseq_8961_000001.gene23129
SIN_1009629	210	AT3G15810.1	tarseq_14168_000001.gene30384	tarseq_8961_000001.gene23130
SIN_1009630	804	AT1G80080.1	tarseq_14168_000001.gene30385	tarseq_8961_000001.gene23131
SIN_1009631	2380	AT1G80070.1	tarseq_14168_000001.gene30386	tarseq_8961_000001.gene23132
SIN_1009632	222	AT5G11160.1	tarseq_14168_000002.gene30387	tarseq_8961_000002.gene23133
SIN_1010745	356	AT2G47410.1	NA	tarseq_33339_000001.gene32382
SIN_1010746	702	AT4G02060.1	tarseq_53514_000001.gene38107	tarseq_9292_000001.gene23619
SIN_1010747	272	AT5G32440.1	tarseq_11192_000001.gene26735	tarseq_5711_000003.gene17743
SIN_1010748	499	AT1G80030.1	tarseq_11192_000001.gene26736	tarseq_5711_000003.gene17744
SIN_1010749	679	AT3G42170.1	tarseq_11192_000001.gene26737	tarseq_5711_000003.gene17745
SIN_1010750	170	AT1G80450.1	NA	NA
SIN_1010751	516	AT1G80460.1	tarseq_11192_000001.gene26738	tarseq_10612_000001.gene25214
SIN_1010752	764	AT1G15690.1	tarseq_13193_000001.gene29259	tarseq_12802_000002.gene28178
SIN_1010753	162	NA	tarseq_13193_000001.gene29261	tarseq_12802_000002.gene28176
SIN_1010754	166	NA	NA	NA
SIN_1010755	476	AT1G80510.1	tarseq_13193_000001.gene29263	tarseq_12802_000002.gene28174
SIN_1010756	195	AT1G15760.1	tarseq_13193_000001.gene29264	tarseq_12802_000002.gene28173
SIN_1010757	559	AT1G80530.1	tarseq_13193_000001.gene29266	tarseq_12802_000002.gene28171
SIN_1010758	554	AT3G02645.1	tarseq_2456_000003.gene10315	tarseq_9898_000001.gene24445
SIN_1010759	564	AT3G02645.1	tarseq_13193_000001.gene29268	tarseq_12802_000002.gene28169
SIN_1010760	565	AT3G02645.1	tarseq_13193_000001.gene29269	tarseq_12802_000002.gene28168
SIN_1010761	555	AT3G02645.1	tarseq_13193_000001.gene29270	NA
SIN_1010762	485	AT2G26000.2	tarseq_13193_000001.gene29271	tarseq_12802_000002.gene28167
SIN_1010763	507	AT1G80600.1	tarseq_13193_000001.gene29272	tarseq_12802_000001.gene28166
SIN_1010764	124	NA	tarseq_13193_000001.gene29273	tarseq_12802_000001.gene28165
SIN_1010765	89	NA	NA	NA
SIN_1010766	957	AT1G80660.1	tarseq_13193_000002.gene29276	tarseq_12802_000001.gene28163
SIN_1010767	178	AT5G25190.1	tarseq_13193_000002.gene29277	tarseq_12802_000001.gene28162
SIN_1010768	230	AT1G15860.1	tarseq_13193_000002.gene29278	tarseq_12802_000001.gene28161
SIN_1010769	237	AT1G80690.1	NA	NA
SIN_1010770	256	AT1G80980.1	tarseq_15245_000001.gene31628	tarseq_12295_000001.gene27370
SIN_1010771	270	AT5G10970.1	tarseq_15245_000001.gene31629	tarseq_12295_000001.gene27371
SIN_1010772	116	AT1G15900.1	NA	NA
SIN_1010773	304	AT1G80760.1	tarseq_15245_000002.gene31630	tarseq_12295_000002.gene27372
SIN_1010774	272	AT2G32070.1	tarseq_15245_000002.gene31631	tarseq_12295_000002.gene27373
SIN_1010775	276	AT2G32070.1	tarseq_15245_000002.gene31632	tarseq_12295_000002.gene27374
SIN_1010776	172	AT2G32060.1	tarseq_15245_000002.gene31633	tarseq_12295_000002.gene27375
SIN_1010777	172	AT2G25110.1	NA	NA
SIN_1010778	549	AT1G11870.2	tarseq_15245_000002.gene31635	tarseq_12295_000002.gene27377
SIN_1010779	275	AT4G31880.2	tarseq_15245_000002.gene31636	tarseq_12295_000002.gene27378
SIN_1010780	432	NA	tarseq_15245_000002.gene31637	tarseq_12295_000002.gene27379
SIN_1010781	332	AT1G15950.1	tarseq_7357_000001.gene21308	tarseq_10540_000001.gene25166
SIN_1010782	518	AT1G15960.1	tarseq_7357_000001.gene21307	tarseq_10540_000001.gene25167
SIN_1010783	296	AT1G80840.1	tarseq_7357_000001.gene21306	tarseq_8167_000004.gene21970
SIN_1010784	395	AT5G57970.1	tarseq_7357_000001.gene21305	tarseq_8167_000004.gene21969
SIN_1010785	161	AT1G80860.2	tarseq_7357_000001.gene21304	tarseq_8167_000004.gene21968
SIN_1010786	727	AT1G80870.1	tarseq_11900_000001.gene27630	tarseq_8167_000003.gene21967
SIN_1010787	167	AT5G15350.1	tarseq_11900_000001.gene27629	tarseq_8167_000003.gene21966
SIN_1010788	96	NA	tarseq_11900_000001.gene27628	tarseq_8167_000003.gene21965
SIN_1010789	445	AT1G16010.2	tarseq_11900_000001.gene27627	tarseq_8167_000003.gene21964
SIN_1010790	155	AT1G80920.1	tarseq_11900_000001.gene27626	tarseq_8167_000003.gene21963
SIN_1010791	392	AT5G48930.1	tarseq_15141_000002.gene31481	tarseq_13907_000001.gene29874
SIN_1010792	432	AT5G48930.1	tarseq_15141_000002.gene31482	tarseq_14121_000002.gene30334
SIN_1010793	403	AT5G18420.1	tarseq_6775_000007.gene20462	tarseq_851_000001.gene5379
SIN_1010794	655	AT1G16030.1	tarseq_6775_000007.gene20461	tarseq_851_000001.gene5378
SIN_1010795	407	AT4G36950.1	tarseq_6775_000007.gene20460	tarseq_851_000001.gene5377
SIN_1010796	245	AT1G56450.1	tarseq_6775_000007.gene20459	tarseq_851_000001.gene5376
SIN_1010797	93	NA	NA	NA
SIN_1010798	144	NA	NA	NA
SIN_1010799	124	NA	NA	NA
SIN_1010800	149	AT1G80940.1	tarseq_6775_000006.gene20458	tarseq_11571_000001.gene26488
SIN_1010801	531	AT2G24100.1	tarseq_6775_000006.gene20457	tarseq_11571_000001.gene26489
SIN_1010802	470	AT1G79720.1	tarseq_6775_000005.gene20456	tarseq_11571_000002.gene26490
SIN_1010803	498	AT1G79710.1	tarseq_6775_000005.gene20455	tarseq_11571_000002.gene26491
SIN_1010804	331	AT1G16060.1	tarseq_6775_000005.gene20454	tarseq_6923_000002.gene20087
SIN_1010805	306	AT1G16080.1	tarseq_6775_000005.gene20453	tarseq_6923_000002.gene20086
SIN_1010806	103	AT1G79660.1	NA	NA
SIN_1010807	414	AT1G16180.1	tarseq_6775_000005.gene20452	tarseq_6923_000002.gene20085
SIN_1010808	338	AT1G79650.1	tarseq_6775_000005.gene20451	tarseq_6923_000002.gene20084
SIN_1010809	660	AT1G79640.1	tarseq_6183_000001.gene19423	tarseq_3467_000001.gene12724
SIN_1010810	1033	AT5G57800.1	tarseq_6775_000004.gene20448	tarseq_6923_000001.gene20081
SIN_1010811	260	AT1G67940.1	tarseq_6775_000004.gene20447	tarseq_6923_000001.gene20080
SIN_1010812	427	AT2G24530.1	tarseq_6775_000004.gene20446	tarseq_6923_000001.gene20079
SIN_1010813	78	NA	NA	NA
SIN_1010814	478	NA	NA	tarseq_6923_000001.gene20077
SIN_1010815	262	AT3G14250.1	tarseq_6775_000004.gene20443	tarseq_14564_000001.gene31182
SIN_1010816	269	AT3G14250.1	tarseq_6775_000003.gene20442	tarseq_14564_000001.gene31181
SIN_1010817	546	AT3G21240.1	tarseq_6775_000002.gene20440	tarseq_14564_000001.gene31180
SIN_1010818	230	AT1G16880.1	tarseq_6775_000001.gene20439	tarseq_14564_000001.gene31179
SIN_1010819	55	NA	NA	NA
SIN_1010820	921	AT5G47910.1	tarseq_9709_000001.gene24729	tarseq_14763_000001.gene31708
SIN_1010821	646	AT5G07380.1	tarseq_6775_000001.gene20437	tarseq_14564_000001.gene31177
SIN_1010822	222	AT5G61750.1	NA	NA
SIN_1010823	977	AT5G07350.2	tarseq_6775_000001.gene20436	tarseq_14564_000001.gene31176
SIN_1010824	536	AT5G61790.1	tarseq_6775_000001.gene20435	tarseq_14564_000001.gene31175
SIN_1010825	419	AT5G51050.1	tarseq_6775_000001.gene20434	tarseq_14564_000001.gene31174
SIN_1010826	313	AT5G51030.1	tarseq_6775_000001.gene20433	tarseq_14564_000001.gene31173
SIN_1010827	112	AT5G51040.3	tarseq_17406_000001.gene34284	tarseq_12677_000001.gene27979
SIN_1010828	217	AT3G23760.1	tarseq_6775_000001.gene20432	tarseq_14564_000001.gene31172
SIN_1010829	416	AT5G61840.1	tarseq_6775_000001.gene20431	tarseq_14564_000001.gene31171
SIN_1010830	707	AT1G29880.1	tarseq_6775_000001.gene20429	tarseq_14564_000001.gene31169
SIN_1010831	601	AT1G29880.1	tarseq_2617_000001.gene11025	tarseq_33322_000001.gene32371
SIN_1010832	122	AT5G61880.1	tarseq_2629_000003.gene11045	tarseq_3066_000003.gene11856
SIN_1010833	152	AT4G17010.1	NA	NA
SIN_1010834	593	AT5G61910.4	tarseq_2629_000003.gene11044	tarseq_3066_000003.gene11855
SIN_1010835	389	AT5G25150.1	tarseq_2045_000001.gene8998	tarseq_7709_000002.gene21317
SIN_1010836	144	NA	tarseq_2045_000001.gene8999	tarseq_7709_000002.gene21318
SIN_1010837	343	AT2G33550.1	tarseq_2045_000001.gene9000	tarseq_7709_000002.gene21319
SIN_1010838	320	AT4G25080.3	tarseq_2045_000001.gene9001	tarseq_7709_000002.gene21320
SIN_1010839	984	AT5G13980.1	tarseq_2045_000001.gene9002	tarseq_7709_000002.gene21321
SIN_1010840	602	AT5G61970.1	tarseq_2045_000001.gene9003	tarseq_7709_000002.gene21322
SIN_1010841	839	AT5G62000.1	tarseq_2045_000001.gene9004	tarseq_14371_000001.gene30771
SIN_1010842	519	AT3G26744.1	tarseq_2045_000001.gene9005	tarseq_14371_000001.gene30770
SIN_1010843	820	AT5G50920.1	NA	NA
SIN_1010844	138	AT4G25050.1	NA	NA
SIN_1010845	253	NA	tarseq_2045_000002.gene9007	tarseq_14371_000001.gene30768
SIN_1010846	356	AT5G37600.1	tarseq_2045_000002.gene9008	tarseq_2699_000001.gene10989
SIN_1010847	792	AT5G42390.1	tarseq_2045_000002.gene9009	tarseq_2699_000001.gene10990
SIN_1010848	518	AT5G42390.1	tarseq_4857_000001.gene16709	NA
SIN_1010849	208	AT2G01670.1	tarseq_4857_000002.gene16710	tarseq_7559_000001.gene21052
SIN_1010850	266	AT4G37110.1	tarseq_4857_000002.gene16711	NA
SIN_1010851	515	AT3G17830.1	tarseq_4857_000002.gene16712	tarseq_7559_000001.gene21053
SIN_1010852	654	AT1G48480.1	tarseq_577_000001.gene1683	tarseq_7559_000001.gene21054
SIN_1010853	1304	AT3G17850.1	tarseq_15654_000001.gene32149	tarseq_7559_000001.gene21055
SIN_1010854	424	AT2G01940.3	tarseq_17528_000001.gene34419	tarseq_12378_000003.gene27569
SIN_1010855	148	NA	tarseq_17528_000002.gene34420	tarseq_14653_000001.gene31378
SIN_1010856	310	AT1G14685.3	tarseq_17528_000002.gene34421	tarseq_14653_000001.gene31379
SIN_1010857	286	AT3G17770.1	NA	NA
SIN_1010858	306	AT1G48430.1	tarseq_17528_000002.gene34422	tarseq_14653_000001.gene31380
SIN_1010859	400	AT1G73480.1	tarseq_17528_000002.gene34423	tarseq_14653_000001.gene31381
SIN_1010860	325	AT3G17790.1	tarseq_12319_000001.gene28107	tarseq_3641_000001.gene13088
SIN_1010861	193	AT1G73820.1	tarseq_17528_000002.gene34425	tarseq_14653_000001.gene31383
SIN_1010862	1167	AT2G39260.1	tarseq_17528_000002.gene34426	tarseq_14653_000001.gene31384
SIN_1010863	851	AT3G02850.1	tarseq_17528_000002.gene34427	tarseq_14653_000001.gene31385
SIN_1010864	322	AT1G73500.1	tarseq_17528_000002.gene34428	tarseq_14653_000001.gene31386
SIN_1010865	397	AT3G17810.1	tarseq_17528_000002.gene34429	tarseq_14653_000001.gene31387
SIN_1010866	1120	AT1G10170.1	tarseq_17528_000002.gene34430	tarseq_14653_000001.gene31388
SIN_1010867	1079	AT4G32640.1	NA	NA
SIN_1010868	363	AT3G48850.1	tarseq_17528_000002.gene34431	tarseq_14653_000001.gene31389
SIN_1010869	320	AT5G50915.1	tarseq_17528_000002.gene34432	tarseq_14653_000001.gene31390
SIN_1010870	353	AT1G12840.1	NA	NA
SIN_1010871	524	AT5G23670.1	tarseq_936_000004.gene2596	tarseq_627_000002.gene2131
SIN_1010872	221	AT5G14030.1	tarseq_18280_000001.gene36086	tarseq_14653_000001.gene31392
SIN_1010873	181	NA	tarseq_18280_000001.gene36087	tarseq_14653_000001.gene31393
SIN_1010874	728	AT5G41110.1	tarseq_18280_000001.gene36088	tarseq_14653_000001.gene31394
SIN_1010875	195	AT5G50870.1	tarseq_18280_000001.gene36089	tarseq_14653_000001.gene31395
SIN_1010876	238	AT5G50790.1	tarseq_18280_000001.gene36090	tarseq_14653_000001.gene31396
SIN_1010877	272	AT5G23660.1	tarseq_2465_000001.gene10371	tarseq_2861_000001.gene11413
SIN_1010878	94	NA	NA	NA
SIN_1010879	374	AT3G26935.1	tarseq_2465_000001.gene10372	tarseq_2861_000001.gene11414
SIN_1010880	55	AT5G50810.1	NA	NA
SIN_1010881	227	AT5G13180.1	tarseq_2465_000001.gene10373	tarseq_2861_000001.gene11415
SIN_1010882	1319	AT5G16715.1	tarseq_2465_000001.gene10374	tarseq_2861_000001.gene11416
SIN_1010883	581	AT5G50860.1	tarseq_10023_000001.gene25134	tarseq_4672_000001.gene15730
SIN_1010884	261	AT5G50790.1	tarseq_10023_000001.gene25135	tarseq_4672_000001.gene15731
SIN_1010885	354	AT5G51140.2	tarseq_10023_000001.gene25136	tarseq_4672_000001.gene15732
SIN_1010886	194	AT4G24972.1	tarseq_10023_000001.gene25137	tarseq_4672_000001.gene15733
SIN_1010887	169	AT5G50760.1	tarseq_10023_000001.gene25138	tarseq_4672_000001.gene15734
SIN_1010888	368	AT5G02890.1	tarseq_10023_000001.gene25139	tarseq_4672_000001.gene15735
SIN_1010889	310	AT2G44800.1	tarseq_10023_000001.gene25140	tarseq_4672_000001.gene15736
SIN_1010890	579	AT3G48710.1	NA	NA
SIN_1010891	561	AT3G48710.1	tarseq_10023_000001.gene25141	tarseq_4672_000001.gene15737
SIN_1010892	340	AT5G50740.1	tarseq_10023_000001.gene25142	tarseq_4672_000001.gene15738
SIN_1010893	144	NA	tarseq_10023_000001.gene25143	tarseq_4672_000002.gene15739
SIN_1010894	542	AT5G50640.1	tarseq_10023_000001.gene25144	tarseq_4672_000002.gene15740
SIN_1010895	511	AT3G48610.1	tarseq_10023_000001.gene25145	tarseq_4672_000002.gene15741
SIN_1010896	69	AT4G24920.1	tarseq_10023_000001.gene25146	tarseq_4672_000002.gene15742
SIN_1010897	149	AT4G24130.1	tarseq_10023_000001.gene25147	tarseq_4672_000002.gene15743
SIN_1010898	273	AT1G30230.2	tarseq_10023_000001.gene25148	tarseq_4672_000002.gene15744
SIN_1010899	246	AT2G18110.1	NA	NA
SIN_1010900	264	AT5G63440.2	NA	NA
SIN_1010901	499	AT5G14170.1	tarseq_10023_000001.gene25149	tarseq_4672_000002.gene15745
SIN_1010902	289	AT3G48520.1	NA	NA
SIN_1010903	217	AT1G48120.1	tarseq_7345_000001.gene21234	tarseq_7912_000001.gene21624
SIN_1010904	925	AT3G48520.1	tarseq_2073_000001.gene9127	tarseq_4672_000002.gene15746
SIN_1010905	426	AT3G48530.1	tarseq_5256_000003.gene17575	tarseq_6472_000005.gene19198
SIN_1010906	703	AT5G50390.1	tarseq_2073_000001.gene9129	tarseq_4672_000003.gene15749
SIN_1010907	159	AT3G48550.1	tarseq_2073_000001.gene9130	tarseq_4672_000003.gene15750
SIN_1010908	757	AT4G24840.1	tarseq_2073_000001.gene9131	tarseq_4672_000003.gene15751
SIN_1010909	594	AT1G56110.1	tarseq_2073_000001.gene9133	tarseq_4672_000004.gene15754
SIN_1010910	243	AT5G63400.1	tarseq_2073_000002.gene9134	tarseq_4672_000004.gene15755
SIN_1010911	480	AT5G60160.1	tarseq_2073_000002.gene9135	tarseq_4672_000004.gene15756
SIN_1010912	95	AT5G20090.1	NA	NA
SIN_1010913	322	AT1G29320.1	tarseq_13269_000001.gene29340	NA
SIN_1010914	534	AT5G63380.1	tarseq_2554_000008.gene10832	tarseq_4672_000004.gene15757
SIN_1010915	871	AT5G35450.1	tarseq_2554_000007.gene10827	tarseq_961_000004.gene5792
SIN_1010916	732	AT3G46530.1	tarseq_2554_000008.gene10830	tarseq_4672_000004.gene15759
SIN_1010917	306	AT5G50360.1	tarseq_2554_000007.gene10829	tarseq_961_000004.gene5794
SIN_1010918	829	AT3G27260.1	tarseq_2554_000007.gene10828	tarseq_961_000004.gene5793
SIN_1010919	157	AT3G46530.1	NA	NA
SIN_1010920	1398	AT3G14470.1	tarseq_2554_000007.gene10826	tarseq_961_000004.gene5791
SIN_1010921	435	AT1G24430.1	tarseq_2554_000007.gene10825	tarseq_961_000004.gene5790
SIN_1010922	505	AT1G66350.1	tarseq_2554_000007.gene10824	tarseq_961_000004.gene5789
SIN_1010923	386	AT4G24820.1	tarseq_2554_000007.gene10823	tarseq_961_000004.gene5788
SIN_1010924	198	AT3G27160.1	tarseq_2554_000007.gene10822	tarseq_961_000004.gene5787
SIN_1010925	565	AT5G50320.1	tarseq_2554_000005.gene10821	tarseq_961_000003.gene5786
SIN_1010926	224	AT5G63280.1	NA	NA
SIN_1010927	472	NA	tarseq_2554_000005.gene10819	tarseq_961_000003.gene5784
SIN_1010928	254	AT1G24440.1	NA	NA
SIN_1010929	385	AT3G48460.1	tarseq_2554_000005.gene10818	tarseq_961_000003.gene5783
SIN_1010930	95	NA	NA	NA
SIN_1010931	155	AT1G18280.1	tarseq_2554_000005.gene10817	tarseq_961_000003.gene5782
SIN_1010932	429	AT3G13940.1	tarseq_2554_000004.gene10816	tarseq_961_000002.gene5781
SIN_1010933	1135	AT1G48540.1	tarseq_2554_000004.gene10815	tarseq_961_000002.gene5780
SIN_1010934	177	AT1G18290.1	tarseq_2554_000004.gene10814	tarseq_961_000002.gene5779
SIN_1010935	139	NA	tarseq_2554_000004.gene10813	tarseq_961_000001.gene5778
SIN_1010936	756	AT1G48550.1	tarseq_2554_000004.gene10811	tarseq_6339_000001.gene18991
SIN_1010937	589	AT3G17970.1	tarseq_2554_000004.gene10810	tarseq_6339_000001.gene18990
SIN_1010938	444	AT1G48580.1	tarseq_2554_000004.gene10809	tarseq_6339_000001.gene18989
SIN_1010939	189	AT3G17980.1	tarseq_2554_000004.gene10808	tarseq_6339_000001.gene18988
SIN_1010940	599	AT1G73590.1	tarseq_2554_000003.gene10806	tarseq_6339_000001.gene18987
SIN_1010941	494	AT3G18000.1	tarseq_2554_000003.gene10805	tarseq_6339_000001.gene18985
SIN_1010942	72	NA	NA	NA
SIN_1010943	288	AT3G18010.1	tarseq_2554_000002.gene10804	tarseq_6339_000001.gene18984
SIN_1010944	248	AT1G73620.1	tarseq_2554_000002.gene10803	tarseq_6339_000001.gene18983
SIN_1010945	77	NA	NA	NA
SIN_1010946	160	AT1G18210.1	tarseq_2554_000001.gene10802	tarseq_6339_000001.gene18982
SIN_1010947	223	AT1G73640.1	NA	NA
SIN_1010948	633	AT1G18190.1	tarseq_2554_000001.gene10801	tarseq_6339_000001.gene18981
SIN_1010949	340	AT1G73650.3	NA	NA
SIN_1010950	1043	AT1G73660.1	tarseq_2554_000001.gene10800	tarseq_6339_000001.gene18980
SIN_1010951	339	AT3G18035.1	tarseq_2554_000001.gene10798	tarseq_6339_000001.gene18978
SIN_1010952	583	AT3G18040.1	tarseq_2554_000001.gene10797	tarseq_6339_000001.gene18977
SIN_1010953	772	AT4G02750.1	tarseq_2554_000001.gene10796	tarseq_6339_000001.gene18976
SIN_1010954	568	AT1G18140.1	tarseq_2554_000001.gene10795	tarseq_6339_000001.gene18975
SIN_1010955	309	NA	tarseq_2554_000001.gene10794	NA
SIN_1010956	342	AT3G18050.1	tarseq_2554_000001.gene10793	tarseq_13927_000001.gene29946
SIN_1010957	609	AT3G18060.1	tarseq_2554_000001.gene10792	tarseq_13927_000001.gene29947
SIN_1010958	488	AT3G18070.2	tarseq_2554_000001.gene10791	tarseq_13927_000001.gene29948
SIN_1010959	1141	AT3G18100.1	tarseq_2554_000001.gene10790	tarseq_13927_000001.gene29949
SIN_1010960	380	AT3G18130.1	NA	NA
SIN_1010961	163	AT1G48635.2	tarseq_2554_000001.gene10788	tarseq_13927_000001.gene29951
SIN_1010962	52	NA	NA	NA
SIN_1010963	60	NA	NA	NA
SIN_1010964	297	AT1G18040.1	tarseq_17654_000001.gene34616	tarseq_14265_000001.gene30575
SIN_1010965	486	AT5G52450.1	tarseq_17654_000001.gene34615	tarseq_14265_000001.gene30574
SIN_1013582	743	AT1G68930.1	tarseq_3694_000002.gene14149	tarseq_5351_000001.gene17129
SIN_1013583	536	AT1G68920.3	NA	NA
SIN_1013584	695	AT1G68910.1	tarseq_3694_000002.gene14147	tarseq_5351_000001.gene17132
SIN_1013585	79	NA	NA	NA
SIN_1013586	1692	AT1G68890.1	tarseq_3694_000002.gene14145	tarseq_5351_000002.gene17134
SIN_1013587	197	AT3G30530.1	tarseq_3694_000001.gene14144	tarseq_5351_000002.gene17135
SIN_1013588	618	AT1G26230.1	tarseq_3694_000001.gene14143	tarseq_5351_000002.gene17136
SIN_1013589	184	AT1G26220.1	tarseq_3694_000001.gene14142	tarseq_5351_000002.gene17137
SIN_1013590	69	NA	NA	NA
SIN_1013591	308	AT1G13580.2	tarseq_3694_000001.gene14141	tarseq_5351_000002.gene17138
SIN_1013592	267	AT3G25545.1	tarseq_3694_000001.gene14140	tarseq_5351_000002.gene17139
SIN_1013593	339	AT1G68850.1	NA	NA
SIN_1013594	648	AT1G26190.1	tarseq_3694_000001.gene14139	tarseq_5351_000002.gene17140
SIN_1013595	627	AT5G16000.1	tarseq_3694_000001.gene14138	tarseq_5351_000002.gene17141
SIN_1013596	407	AT3G25570.1	tarseq_3694_000001.gene14137	tarseq_5351_000002.gene17142
SIN_1013597	389	AT1G13560.1	tarseq_3694_000001.gene14136	tarseq_5351_000002.gene17143
SIN_1013598	302	AT4G12560.1	tarseq_3694_000001.gene14135	tarseq_5351_000002.gene17144
SIN_1013599	271	AT1G26180.1	NA	tarseq_5351_000002.gene17145
SIN_1013600	382	AT3G25590.1	tarseq_3694_000001.gene14134	tarseq_5351_000002.gene17146
SIN_1013601	1034	AT1G26170.1	tarseq_8342_000001.gene22756	tarseq_5351_000002.gene17147
SIN_1013602	122	NA	NA	NA
SIN_1013603	125	NA	NA	NA
SIN_1013604	139	NA	NA	NA
SIN_1013605	147	NA	tarseq_8342_000001.gene22757	tarseq_5351_000004.gene17148
SIN_1013606	754	AT1G26150.1	tarseq_8342_000001.gene22759	tarseq_5351_000004.gene17150
SIN_1013607	158	NA	NA	NA
SIN_1013608	141	AT1G18530.1	tarseq_8342_000002.gene22760	tarseq_5351_000004.gene17151
SIN_1013609	787	AT1G68740.1	tarseq_8342_000002.gene22761	tarseq_5351_000004.gene17152
SIN_1013610	1191	AT1G68710.1	tarseq_8342_000002.gene22762	tarseq_5351_000006.gene17153
SIN_1013611	672	AT3G25620.2	tarseq_8342_000002.gene22763	tarseq_5351_000006.gene17154
SIN_1013612	149	AT1G68760.1	tarseq_8965_000002.gene23668	tarseq_5750_000001.gene17807
SIN_1013613	189	AT1G22900.1	tarseq_8965_000002.gene23667	tarseq_5750_000001.gene17808
SIN_1013614	269	AT3G25640.1	tarseq_8965_000002.gene23666	tarseq_5750_000001.gene17809
SIN_1013615	223	AT3G25640.1	tarseq_8965_000002.gene23665	tarseq_5750_000001.gene17810
SIN_1013616	74	NA	NA	NA
SIN_1013617	477	AT1G68780.1	tarseq_8965_000002.gene23664	tarseq_5750_000001.gene17811
SIN_1013618	1202	AT1G67230.1	tarseq_8965_000002.gene23663	tarseq_5750_000001.gene17812
SIN_1013619	613	AT1G26110.2	tarseq_8965_000002.gene23662	tarseq_5750_000001.gene17813
SIN_1013620	321	AT3G21360.1	tarseq_8965_000002.gene23661	tarseq_5750_000001.gene17814
SIN_1013621	239	AT1G26100.1	NA	NA
SIN_1013622	990	AT3G25690.1	tarseq_3251_000003.gene12910	tarseq_5750_000001.gene17815
SIN_1013623	110	NA	tarseq_8965_000002.gene23658	tarseq_5750_000001.gene17817
SIN_1013624	293	AT1G25682.1	tarseq_8965_000002.gene23657	tarseq_5750_000001.gene17818
SIN_1013625	407	AT1G68800.1	tarseq_8965_000002.gene23656	tarseq_5750_000001.gene17819
SIN_1013626	323	AT1G68810.1	tarseq_8965_000001.gene23655	tarseq_5750_000001.gene17820
SIN_1013627	360	AT1G68820.1	tarseq_10569_000001.gene25898	NA
SIN_1013628	426	AT1G25580.1	tarseq_8965_000001.gene23654	tarseq_5750_000001.gene17821
SIN_1013629	61	NA	NA	NA
SIN_1013630	575	AT1G68830.1	tarseq_8965_000001.gene23653	tarseq_5750_000002.gene17822
SIN_1013631	341	AT1G13250.1	tarseq_8965_000001.gene23652	tarseq_5750_000002.gene17823
SIN_1013632	92	NA	NA	NA
SIN_1013633	633	AT1G25570.1	tarseq_8965_000001.gene23650	tarseq_5750_000002.gene17825
SIN_1013634	354	AT1G25560.1	tarseq_8965_000001.gene23649	tarseq_5750_000002.gene17826
SIN_1013635	248	AT1G13280.1	tarseq_8965_000001.gene23648	tarseq_5750_000002.gene17827
SIN_1013636	283	AT1G13290.1	NA	NA
SIN_1013637	377	AT1G25550.1	tarseq_8965_000001.gene23647	tarseq_5750_000002.gene17828
SIN_1013638	821	AT1G25540.1	tarseq_8107_000004.gene22404	tarseq_5750_000002.gene17830
SIN_1013639	489	AT1G25510.1	tarseq_8965_000001.gene23644	tarseq_5750_000002.gene17831
SIN_1013640	233	AT1G25500.2	tarseq_8965_000001.gene23643	tarseq_5750_000002.gene17832
SIN_1013641	461	AT1G68640.1	tarseq_8965_000001.gene23642	tarseq_5750_000002.gene17833
SIN_1013642	135	NA	tarseq_8965_000001.gene23641	tarseq_5750_000002.gene17834
SIN_1013643	123	NA	tarseq_8965_000001.gene23640	tarseq_5750_000002.gene17835
SIN_1013644	181	AT1G14870.1	NA	NA
SIN_1013645	344	AT5G16080.1	tarseq_8965_000001.gene23639	tarseq_5750_000002.gene17836
SIN_1013646	587	AT3G25800.1	tarseq_8965_000001.gene23638	tarseq_5750_000002.gene17837
SIN_1013647	550	AT3G18440.1	tarseq_8965_000001.gene23637	tarseq_5750_000002.gene17838
SIN_1013648	564	AT3G18440.1	tarseq_8965_000001.gene23636	tarseq_5750_000002.gene17839
SIN_1013649	171	AT1G68590.1	NA	NA
SIN_1013650	1011	AT3G25840.1	tarseq_8965_000001.gene23635	tarseq_5750_000002.gene17840
SIN_1013651	198	AT3G25855.1	NA	NA
SIN_1013652	675	AT1G68580.2	tarseq_8965_000001.gene23634	tarseq_5750_000002.gene17841
SIN_1013653	348	AT3G24520.1	tarseq_17816_000001.gene34868	tarseq_5750_000002.gene17842
SIN_1013654	469	AT3G25860.1	tarseq_17816_000001.gene34869	tarseq_5750_000002.gene17843
SIN_1013655	292	AT4G39670.1	tarseq_17816_000001.gene34870	tarseq_5750_000002.gene17844
SIN_1013656	562	AT1G68570.1	tarseq_18278_000001.gene36079	tarseq_885_000001.gene5489
SIN_1013657	183	AT1G13360.1	tarseq_18278_000001.gene36078	tarseq_885_000001.gene5490
SIN_1013658	112	NA	tarseq_4833_000002.gene16666	tarseq_5671_000001.gene17692
SIN_1013659	939	AT1G68560.1	tarseq_4833_000002.gene16667	tarseq_5671_000001.gene17691
SIN_1013660	357	AT1G68550.1	tarseq_4833_000002.gene16668	tarseq_5671_000001.gene17690
SIN_1013661	225	NA	tarseq_4833_000002.gene16669	tarseq_5671_000001.gene17689
SIN_1013662	327	AT1G68540.1	tarseq_4833_000002.gene16671	tarseq_5671_000001.gene17687
SIN_1013663	496	AT1G68530.1	tarseq_1596_000003.gene7735	tarseq_954_000004.gene5757
SIN_1013664	670	AT3G42170.1	tarseq_4833_000002.gene16674	tarseq_32810_000001.gene32240
SIN_1013665	439	AT1G25440.1	tarseq_11685_000002.gene27372	tarseq_14485_000002.gene31001
SIN_1013666	258	AT3G02550.1	tarseq_11685_000001.gene27371	tarseq_14485_000001.gene31000
SIN_1013667	99	NA	NA	NA
SIN_1013668	169	AT1G13380.1	NA	NA
SIN_1013669	117	NA	tarseq_11685_000001.gene27370	tarseq_14485_000001.gene30999
SIN_1013670	172	AT5G16110.1	tarseq_1936_000005.gene8765	tarseq_846_000002.gene5359
SIN_1013671	96	AT3G25920.1	tarseq_1936_000005.gene8764	tarseq_846_000002.gene5358
SIN_1013672	245	AT1G68480.1	tarseq_1858_000005.gene8428	tarseq_846_000002.gene5357
SIN_1013673	280	AT1G25420.1	tarseq_1936_000004.gene8762	tarseq_846_000002.gene5356
SIN_1013674	529	AT1G13410.1	tarseq_1936_000004.gene8761	tarseq_846_000002.gene5355
SIN_1013675	316	AT1G25410.1	tarseq_1936_000004.gene8760	tarseq_846_000002.gene5354
SIN_1013676	229	NA	tarseq_1936_000004.gene8759	tarseq_846_000002.gene5353
SIN_1013677	310	NA	tarseq_1936_000004.gene8758	tarseq_846_000002.gene5352
SIN_1013678	166	AT1G35290.1	tarseq_1858_000005.gene8424	tarseq_846_000002.gene5351
SIN_1013679	155	AT1G68300.1	tarseq_1936_000003.gene8756	tarseq_846_000002.gene5350
SIN_1013680	202	AT1G68280.1	NA	NA
SIN_1013681	320	AT5G16990.1	tarseq_1936_000003.gene8753	tarseq_846_000002.gene5347
SIN_1013682	271	AT1G25330.1	tarseq_1936_000003.gene8752	tarseq_846_000002.gene5346
SIN_1013683	303	AT1G68320.1	tarseq_1936_000003.gene8751	tarseq_846_000002.gene5345
SIN_1013684	795	AT1G25350.1	tarseq_1858_000005.gene8422	tarseq_846_000002.gene5344
SIN_1013685	268	AT1G68330.1	tarseq_1936_000003.gene8749	tarseq_846_000002.gene5343
SIN_1013686	312	AT1G25370.1	tarseq_1936_000003.gene8748	tarseq_846_000002.gene5342
SIN_1013687	543	AT2G31170.1	tarseq_1936_000003.gene8747	tarseq_846_000002.gene5341
SIN_1013688	425	AT1G68370.1	tarseq_1936_000002.gene8745	tarseq_846_000001.gene5339
SIN_1013689	1217	AT3G18290.1	tarseq_1936_000002.gene8744	tarseq_8001_000005.gene21737
SIN_1013690	843	AT1G25375.1	tarseq_1936_000002.gene8743	tarseq_8001_000005.gene21736
SIN_1013691	671	AT1G68400.1	tarseq_1936_000001.gene8742	tarseq_8001_000004.gene21734
SIN_1013692	540	AT3G11710.1	tarseq_1936_000001.gene8741	tarseq_8001_000004.gene21733
SIN_1013693	604	AT1G70250.1	NA	NA
SIN_1013694	627	AT1G70250.1	tarseq_1936_000001.gene8740	tarseq_8001_000004.gene21732
SIN_1013695	283	AT1G68410.1	NA	NA
SIN_1013696	367	AT1G25380.1	tarseq_1936_000001.gene8739	tarseq_8001_000004.gene21731
SIN_1013697	902	AT1G25390.1	tarseq_1936_000001.gene8738	tarseq_8001_000004.gene21730
SIN_1013698	415	AT1G15030.1	tarseq_1936_000001.gene8737	tarseq_8001_000004.gene21729
SIN_1013699	60	AT1G68220.1	NA	NA
SIN_1013700	79	NA	NA	NA
SIN_1013701	96	AT3G18280.1	tarseq_1936_000001.gene8736	tarseq_8001_000004.gene21728
SIN_1013702	217	AT3G18260.1	tarseq_1936_000001.gene8735	tarseq_8001_000003.gene21727
SIN_1013703	391	NA	tarseq_1936_000001.gene8734	tarseq_8001_000003.gene21726
SIN_1013704	714	AT2G01210.1	tarseq_1936_000001.gene8733	tarseq_8001_000003.gene21725
SIN_1013705	276	AT3G62040.1	tarseq_1936_000001.gene8731	tarseq_8001_000003.gene21723
SIN_1013706	628	AT2G01190.1	tarseq_7107_000002.gene20905	tarseq_8001_000003.gene21722
SIN_1013707	457	AT4G17910.1	tarseq_7107_000001.gene20904	tarseq_8001_000002.gene21721
SIN_1013708	266	AT2G01180.1	NA	NA
SIN_1013709	448	AT1G67710.1	tarseq_7107_000001.gene20901	tarseq_8001_000002.gene21718
SIN_1013710	331	AT1G68200.1	tarseq_7107_000001.gene20900	tarseq_8001_000002.gene21717
SIN_1013711	701	AT1G17980.1	tarseq_448_000001.gene1333	tarseq_72_000001.gene265
SIN_1013712	187	AT1G19080.1	tarseq_8821_000001.gene23413	tarseq_9421_000002.gene23802
SIN_1013713	1097	AT3G27730.1	tarseq_8821_000001.gene23412	tarseq_9421_000002.gene23803
SIN_1013714	443	AT3G18210.1	tarseq_8821_000001.gene23411	tarseq_9421_000002.gene23804
SIN_1013715	421	AT2G01140.1	tarseq_53890_000001.gene38175	tarseq_33059_000001.gene32281
SIN_1013716	393	AT2G01140.1	tarseq_10228_000002.gene25415	tarseq_10900_000001.gene25680
SIN_1013717	1209	AT2G01130.1	tarseq_10228_000002.gene25414	tarseq_10900_000001.gene25679
SIN_1013718	426	AT1G15110.1	tarseq_10228_000002.gene25413	tarseq_10900_000001.gene25678
SIN_1013719	477	AT1G15170.1	tarseq_10228_000002.gene25409	tarseq_10900_000001.gene25674
SIN_1013720	552	AT5G08680.1	tarseq_10228_000002.gene25408	tarseq_10900_000001.gene25673
SIN_1013721	284	AT1G15140.1	tarseq_10228_000002.gene25407	tarseq_10900_000001.gene25672
SIN_1013722	348	NA	tarseq_10228_000001.gene25406	tarseq_10900_000001.gene25671
SIN_1013723	869	AT1G15130.1	tarseq_10228_000001.gene25405	tarseq_10900_000001.gene25670
SIN_1013724	356	AT1G15125.1	tarseq_10228_000001.gene25403	tarseq_10900_000001.gene25668
SIN_1013725	304	NA	NA	NA
SIN_1013726	378	AT1G15125.1	tarseq_10228_000001.gene25402	tarseq_10900_000001.gene25667
SIN_1013727	379	AT1G15125.1	tarseq_343_000001.gene999	tarseq_10900_000001.gene25666
SIN_1013728	104	NA	NA	NA
SIN_1013729	426	NA	tarseq_343_000001.gene1000	tarseq_101_000001.gene401
SIN_1013730	729	AT1G16260.1	tarseq_343_000001.gene1001	tarseq_101_000002.gene402
SIN_1013731	731	AT1G16130.1	tarseq_343_000001.gene1002	tarseq_101_000002.gene403
SIN_1013732	83	NA	tarseq_343_000001.gene1003	tarseq_101_000002.gene404
SIN_1013733	173	AT3G03280.1	tarseq_343_000001.gene1004	tarseq_101_000002.gene405
SIN_1013734	240	AT5G13240.1	tarseq_343_000001.gene1005	tarseq_101_000002.gene406
SIN_1013735	149	AT2G17972.1	NA	NA
SIN_1013736	263	AT2G01275.1	tarseq_8920_000001.gene23560	tarseq_9760_000001.gene24294
SIN_1013737	612	AT1G15020.2	tarseq_8920_000001.gene23561	tarseq_9760_000001.gene24295
SIN_1013738	114	NA	NA	NA
SIN_1013739	472	AT1G71110.1	tarseq_8920_000001.gene23562	tarseq_9760_000001.gene24296
SIN_1013740	290	AT1G71100.1	tarseq_8920_000001.gene23563	tarseq_9760_000001.gene24297
SIN_1013741	85	AT2G01300.1	NA	NA
SIN_1013742	156	NA	NA	NA
SIN_1013743	404	AT5G23200.1	tarseq_8920_000001.gene23565	tarseq_943_000001.gene5652
SIN_1013744	153	AT5G17450.1	tarseq_8920_000001.gene23566	tarseq_943_000001.gene5653
SIN_1013745	85	NA	NA	NA
SIN_1013746	564	AT1G23010.1	tarseq_8920_000001.gene23567	tarseq_943_000001.gene5654
SIN_1013747	651	AT1G71020.1	tarseq_8920_000001.gene23568	tarseq_943_000001.gene5655
SIN_1013748	220	AT2G01340.1	tarseq_8920_000001.gene23569	tarseq_943_000001.gene5656
SIN_1013749	1675	AT1G71010.1	NA	NA
SIN_1013750	329	AT2G01350.4	tarseq_8920_000001.gene23571	tarseq_943_000001.gene5658
SIN_1013751	191	AT1G71000.1	tarseq_8920_000001.gene23572	tarseq_943_000002.gene5659
SIN_1013752	138	NA	NA	NA
SIN_1013753	139	NA	NA	NA
SIN_1013754	609	AT1G70950.1	tarseq_6637_000001.gene20168	tarseq_7326_000001.gene20804
SIN_1013755	72	NA	NA	NA
SIN_1013756	259	NA	NA	NA
SIN_1013757	650	AT1G70940.1	tarseq_11259_000002.gene26847	tarseq_3311_000001.gene12440
SIN_1013758	644	AT1G70940.1	tarseq_9981_000001.gene25088	tarseq_10631_000001.gene25246
SIN_1013759	168	AT2G01430.1	tarseq_7353_000003.gene21260	tarseq_9578_000001.gene23964
SIN_1013760	1019	AT2G01440.1	tarseq_7353_000003.gene21259	tarseq_9578_000001.gene23965
SIN_1013761	494	AT3G18040.1	tarseq_7353_000002.gene21258	NA
SIN_1013762	248	NA	tarseq_1059_000006.gene2981	tarseq_760_000001.gene5108
SIN_1013763	72	NA	NA	NA
SIN_1013764	1190	NA	tarseq_7353_000001.gene21256	tarseq_9578_000001.gene23967
SIN_1013765	172	AT1G30110.1	tarseq_7353_000001.gene21255	tarseq_4968_000003.gene16299
SIN_1013766	545	AT1G23090.1	tarseq_7353_000001.gene21254	tarseq_9578_000001.gene23969
SIN_1013767	110	AT1G23100.1	NA	NA
SIN_1013768	483	AT2G01480.1	tarseq_2873_000001.gene11630	tarseq_4968_000003.gene16295
SIN_1013769	352	AT3G18010.1	tarseq_7353_000001.gene21251	tarseq_9578_000001.gene23973
SIN_1013770	258	AT1G70900.1	tarseq_7353_000001.gene21250	tarseq_9578_000001.gene23974
SIN_1013771	339	NA	tarseq_7353_000001.gene21248	tarseq_9578_000001.gene23975
SIN_1013772	155	AT1G70830.3	tarseq_7353_000001.gene21247	tarseq_9578_000001.gene23976
SIN_1013773	375	AT2G01540.1	tarseq_7353_000001.gene21245	tarseq_9578_000001.gene23977
SIN_1013774	816	AT1G23180.1	tarseq_7353_000001.gene21244	tarseq_9578_000001.gene23979
SIN_1013775	68	NA	NA	NA
SIN_1013776	556	AT2G01600.1	NA	NA
SIN_1013777	206	AT1G14900.1	NA	NA
SIN_1013778	197	AT1G14890.1	tarseq_7353_000001.gene21243	tarseq_2871_000002.gene11432
SIN_1013779	503	AT1G70710.1	tarseq_2511_000001.gene10612	tarseq_2871_000001.gene11431
SIN_1013780	465	NA	tarseq_2511_000001.gene10613	tarseq_3208_000001.gene12140
SIN_1013781	56	NA	NA	NA
SIN_1013782	164	AT1G14870.1	NA	NA
SIN_1013783	65	NA	NA	NA
SIN_1013784	197	AT1G24620.1	tarseq_6427_000002.gene19899	tarseq_2376_000001.gene10129
SIN_1013785	1624	AT1G23230.2	tarseq_6427_000002.gene19898	tarseq_2376_000001.gene10130
SIN_1013786	201	NA	tarseq_150_000002.gene470	tarseq_276_000001.gene1075
SIN_1013787	309	AT1G48120.1	NA	tarseq_2376_000001.gene10132
SIN_1013788	310	AT1G45688.1	tarseq_8597_000001.gene23100	tarseq_5748_000003.gene17804
SIN_1013789	359	AT5G67080.1	tarseq_8597_000001.gene23099	tarseq_5748_000003.gene17803
SIN_1013790	134	AT5G42930.1	NA	NA
SIN_1013791	379	AT1G45207.2	tarseq_8597_000001.gene23096	tarseq_5748_000003.gene17800
SIN_1013792	640	AT5G67030.1	tarseq_8318_000001.gene22724	tarseq_5748_000003.gene17799
SIN_1013793	403	AT5G67020.1	tarseq_8597_000001.gene23094	tarseq_5748_000003.gene17798
SIN_1013794	174	AT2G15680.1	tarseq_8597_000001.gene23093	tarseq_5748_000003.gene17797
SIN_1013795	204	NA	tarseq_13962_000003.gene30079	tarseq_5748_000003.gene17796
SIN_1013796	52	NA	NA	NA
SIN_1013797	785	AT3G05090.1	tarseq_7350_000001.gene21242	tarseq_5748_000001.gene17795
SIN_1013798	481	AT4G19170.1	tarseq_2704_000001.gene11236	tarseq_3204_000001.gene12123
SIN_1013799	572	AT4G19170.1	tarseq_2704_000001.gene11237	tarseq_3204_000001.gene12124
SIN_1013800	546	AT4G19170.1	tarseq_5165_000001.gene17401	tarseq_3204_000001.gene12126
SIN_1013801	85	NA	NA	NA
SIN_1013802	382	AT3G45880.1	tarseq_5165_000001.gene17402	tarseq_14417_000001.gene30870
SIN_1013803	57	NA	NA	NA
SIN_1013804	456	AT4G19160.2	tarseq_5165_000001.gene17403	tarseq_684_000002.gene2397
SIN_1013805	1087	AT3G23640.1	tarseq_5165_000001.gene17404	tarseq_684_000002.gene2398
SIN_1013806	149	NA	NA	NA
SIN_1013807	338	AT1G32350.1	tarseq_5165_000001.gene17406	tarseq_684_000002.gene2400
SIN_1013808	1285	AT1G31810.1	tarseq_5165_000001.gene17407	tarseq_684_000002.gene2401
SIN_1013809	438	AT3G45900.1	tarseq_5165_000001.gene17408	tarseq_684_000002.gene2404
SIN_1013810	90	AT1G31812.1	tarseq_5165_000001.gene17409	tarseq_684_000002.gene2405
SIN_1013811	470	AT1G31830.1	tarseq_15911_000001.gene32513	tarseq_684_000002.gene2406
SIN_1013812	253	AT4G19150.1	tarseq_15911_000001.gene32515	tarseq_684_000002.gene2408
SIN_1013813	73	NA	NA	NA
SIN_1013814	221	AT5G45390.1	tarseq_15911_000001.gene32516	tarseq_684_000002.gene2409
SIN_1013815	505	NA	tarseq_15911_000001.gene32518	tarseq_684_000002.gene2411
SIN_1013816	600	AT1G31850.1	tarseq_15911_000001.gene32519	tarseq_684_000002.gene2412
SIN_1013817	453	AT4G19110.1	tarseq_15911_000001.gene32520	tarseq_684_000002.gene2413
SIN_1013818	309	AT1G31880.1	tarseq_15911_000001.gene32521	tarseq_684_000002.gene2414
SIN_1013819	839	AT4G21380.1	tarseq_15911_000001.gene32523	tarseq_684_000003.gene2416
SIN_1013820	80	NA	NA	NA
SIN_1013821	176	AT4G19070.1	tarseq_15911_000001.gene32524	tarseq_684_000003.gene2417
SIN_1013822	330	AT4G38160.1	tarseq_15911_000001.gene32525	tarseq_684_000003.gene2418
SIN_1013823	428	AT3G13960.1	tarseq_15911_000001.gene32526	tarseq_684_000003.gene2419
SIN_1013824	214	AT5G45550.1	tarseq_1886_000002.gene8529	tarseq_684_000003.gene2420
SIN_1013825	274	AT1G32120.1	tarseq_15911_000001.gene32528	tarseq_684_000003.gene2421
SIN_1013826	310	AT4G19040.1	NA	NA
SIN_1013827	493	AT2G15490.1	tarseq_15911_000001.gene32530	tarseq_684_000003.gene2423
SIN_1013828	413	AT1G80480.1	tarseq_15911_000001.gene32531	tarseq_684_000003.gene2424
SIN_1013829	1151	AT1G15750.1	tarseq_15911_000001.gene32534	tarseq_684_000003.gene2427
SIN_1013830	775	AT1G32090.1	tarseq_15911_000002.gene32536	tarseq_684_000005.gene2429
SIN_1013831	399	AT1G32060.1	tarseq_8194_000002.gene22623	tarseq_684_000005.gene2430
SIN_1013832	240	AT1G32050.1	tarseq_8194_000002.gene22624	tarseq_684_000005.gene2431
SIN_1013833	566	AT1G31970.1	tarseq_15911_000002.gene32539	tarseq_684_000005.gene2432
SIN_1013834	795	AT2G23140.2	NA	NA
SIN_1013835	502	AT1G32130.1	tarseq_15911_000002.gene32541	tarseq_684_000005.gene2434
SIN_1013836	495	AT1G32130.1	tarseq_6946_000001.gene20692	tarseq_8894_000001.gene23043
SIN_1013837	234	NA	tarseq_6946_000002.gene20693	tarseq_8894_000001.gene23042
SIN_1013838	158	AT1G68310.2	NA	NA
SIN_1013839	179	AT4G19003.2	NA	NA
SIN_1013840	510	AT1G31910.1	tarseq_6946_000002.gene20694	tarseq_8894_000001.gene23041
SIN_1013841	862	AT1G31930.1	tarseq_6946_000002.gene20695	tarseq_8894_000001.gene23040
SIN_1013842	472	AT3G46450.1	tarseq_6946_000002.gene20696	tarseq_8894_000001.gene23039
SIN_1013843	328	AT4G19006.1	tarseq_6946_000002.gene20697	tarseq_8894_000001.gene23038
SIN_1013844	68	NA	NA	NA
SIN_1013845	762	AT2G35540.1	tarseq_9356_000002.gene24386	tarseq_10083_000001.gene24722
SIN_1013846	62	AT1G64520.1	NA	NA
SIN_1013847	201	AT1G64520.1	tarseq_9356_000002.gene24384	tarseq_10083_000001.gene24720
SIN_1013848	629	AT4G23980.1	tarseq_9356_000002.gene24383	tarseq_10083_000001.gene24719
SIN_1013849	341	AT1G64500.1	tarseq_9356_000002.gene24382	tarseq_12191_000001.gene27241
SIN_1013850	91	NA	NA	NA
SIN_1013851	112	NA	tarseq_9356_000002.gene24381	tarseq_12191_000001.gene27240
SIN_1013852	74	NA	NA	NA
SIN_1013853	199	AT4G23930.1	tarseq_9356_000002.gene24380	tarseq_3845_000001.gene13771
SIN_1013854	585	AT2G46500.1	tarseq_9356_000002.gene24379	tarseq_3845_000001.gene13772
SIN_1013855	1239	AT4G10930.1	tarseq_9356_000002.gene24378	tarseq_3845_000001.gene13773
SIN_1013856	225	AT4G10925.1	NA	NA
SIN_1013857	106	AT5G42070.1	NA	NA
SIN_1013858	355	AT2G05260.1	tarseq_9356_000002.gene24376	tarseq_3845_000001.gene13775
SIN_1013859	380	AT4G10960.1	tarseq_9356_000002.gene24375	tarseq_3845_000001.gene13776
SIN_1013860	196	AT4G10970.1	tarseq_6008_000001.gene19173	tarseq_1521_000001.gene7670
SIN_1013861	455	AT4G23895.3	tarseq_9356_000001.gene24372	tarseq_3845_000001.gene13778
SIN_1013862	76	NA	tarseq_12999_000001.gene28938	tarseq_3629_000006.gene13028
SIN_1013863	419	AT5G62050.1	tarseq_9356_000001.gene24371	tarseq_3845_000001.gene13781
SIN_1013864	657	AT4G23850.1	tarseq_1752_000001.gene8193	tarseq_1351_000001.gene7117
SIN_1013865	339	AT5G59220.1	tarseq_1752_000001.gene8194	tarseq_1351_000001.gene7116
SIN_1013866	602	AT1G64390.1	tarseq_2706_000002.gene11243	tarseq_13719_000002.gene29570
SIN_1013867	146	NA	NA	NA
SIN_1013868	947	AT3G48110.1	tarseq_4229_000003.gene15411	tarseq_4892_000001.gene16161
SIN_1013869	345	AT3G60300.1	tarseq_4229_000003.gene15410	tarseq_4892_000001.gene16160
SIN_1013870	448	AT2G44810.1	tarseq_4229_000003.gene15409	tarseq_4892_000001.gene16159
SIN_1013871	416	AT2G44810.1	tarseq_4229_000003.gene15408	tarseq_4892_000001.gene16158
SIN_1013872	1043	AT3G60320.1	tarseq_4229_000003.gene15407	tarseq_4892_000001.gene16157
SIN_1013873	254	AT1G02090.1	tarseq_4229_000003.gene15404	tarseq_4892_000001.gene16154
SIN_1013874	114	AT4G33355.2	tarseq_4229_000003.gene15403	tarseq_4892_000001.gene16153
SIN_1013875	117	AT4G33355.1	tarseq_4229_000003.gene15402	tarseq_4892_000001.gene16152
SIN_1013876	211	AT2G44840.1	tarseq_4229_000003.gene15401	tarseq_4892_000001.gene16151
SIN_1013877	181	AT2G44840.1	tarseq_4229_000003.gene15400	tarseq_4892_000001.gene16150
SIN_1013878	191	AT2G44840.1	tarseq_4229_000003.gene15399	tarseq_4892_000001.gene16149
SIN_1013879	334	AT2G45600.1	tarseq_4229_000003.gene15398	tarseq_4892_000001.gene16148
SIN_1013880	117	AT4G33355.1	tarseq_4229_000002.gene15397	tarseq_8995_000003.gene23195
SIN_1013881	116	AT4G33355.1	tarseq_4229_000002.gene15396	tarseq_8995_000003.gene23194
SIN_1013882	116	NA	tarseq_4229_000002.gene15395	tarseq_8995_000003.gene23193
SIN_1013883	114	AT4G33355.2	tarseq_4229_000002.gene15394	tarseq_8995_000003.gene23192
SIN_1013884	699	AT5G56000.1	tarseq_4229_000001.gene15393	tarseq_8995_000003.gene23191
SIN_1013885	609	AT5G54960.1	tarseq_4229_000001.gene15392	tarseq_8995_000003.gene23190
SIN_1013886	327	AT2G44850.2	NA	NA
SIN_1013887	964	AT5G62670.1	tarseq_4229_000001.gene15391	tarseq_8995_000003.gene23189
SIN_1013888	500	AT3G59670.1	tarseq_18225_000001.gene35908	tarseq_8995_000002.gene23187
SIN_1013889	275	AT3G60340.1	tarseq_18225_000001.gene35909	tarseq_8995_000002.gene23186
SIN_1013890	980	AT4G27190.1	tarseq_18225_000001.gene35910	tarseq_8995_000002.gene23185
SIN_1013891	917	AT2G44900.1	tarseq_18225_000001.gene35911	tarseq_8995_000002.gene23184
SIN_1013892	572	AT1G05940.1	tarseq_11811_000001.gene27461	tarseq_8995_000002.gene23183
SIN_1013893	212	AT3G60370.1	NA	NA
SIN_1013894	324	AT2G35680.1	tarseq_11811_000001.gene27462	tarseq_8995_000002.gene23182
SIN_1013895	490	NA	tarseq_11811_000001.gene27463	tarseq_8995_000002.gene23181
SIN_1013896	110	AT4G01710.1	tarseq_11811_000002.gene27464	tarseq_8995_000002.gene23180
SIN_1013897	322	AT4G16780.1	tarseq_11811_000002.gene27465	tarseq_8995_000002.gene23179
SIN_1013898	757	AT3G60460.1	tarseq_11811_000002.gene27466	tarseq_8995_000001.gene23177
SIN_1013899	286	AT3G60490.1	tarseq_9090_000001.gene23953	tarseq_230_000002.gene882
SIN_1013900	895	AT2G44950.1	tarseq_9090_000002.gene23954	tarseq_230_000002.gene883
SIN_1013901	452	AT2G44970.2	NA	NA
SIN_1013902	64	NA	NA	NA
SIN_1013903	354	AT1G02050.1	tarseq_9090_000002.gene23955	tarseq_230_000002.gene884
SIN_1013904	197	NA	tarseq_9090_000002.gene23956	tarseq_230_000002.gene885
SIN_1013905	851	AT2G44980.2	tarseq_9090_000002.gene23957	tarseq_230_000002.gene886
SIN_1013906	652	AT2G44990.1	tarseq_9090_000002.gene23958	tarseq_230_000002.gene887
SIN_1013907	335	NA	tarseq_9090_000002.gene23959	tarseq_230_000002.gene888
SIN_1013908	423	AT2G45000.1	tarseq_9090_000002.gene23961	tarseq_230_000002.gene890
SIN_1013909	456	AT2G22590.1	tarseq_9090_000002.gene23962	tarseq_230_000002.gene891
SIN_1013910	233	AT2G45010.1	NA	NA
SIN_1013911	765	AT2G45030.1	tarseq_9090_000002.gene23963	tarseq_230_000002.gene892
SIN_1013912	163	AT3G15351.1	NA	tarseq_230_000002.gene893
SIN_1013913	326	AT1G02065.1	tarseq_9090_000002.gene23964	tarseq_230_000002.gene894
SIN_1013914	389	AT1G27370.2	tarseq_9090_000002.gene23965	tarseq_230_000002.gene895
SIN_1013915	357	AT2G45040.1	tarseq_9090_000002.gene23966	tarseq_230_000002.gene896
SIN_1013916	127	AT3G60520.1	NA	NA
SIN_1013917	213	AT4G00030.1	tarseq_9090_000002.gene23967	tarseq_230_000002.gene897
SIN_1013918	552	AT3G20050.1	tarseq_4727_000001.gene16445	tarseq_230_000002.gene898
SIN_1013919	239	AT3G60530.1	tarseq_9090_000002.gene23969	tarseq_230_000002.gene899
SIN_1013920	2315	AT1G02080.2	tarseq_9090_000002.gene23970	tarseq_230_000002.gene900
SIN_1013921	82	AT3G60540.1	NA	NA
SIN_1013922	497	AT5G07670.1	tarseq_9090_000002.gene23971	tarseq_230_000002.gene901
SIN_1013923	482	AT4G00050.1	tarseq_9090_000003.gene23972	tarseq_230_000003.gene902
SIN_1013924	220	AT2G45080.1	tarseq_9090_000003.gene23973	tarseq_230_000003.gene903
SIN_1013925	272	AT1G65680.1	tarseq_1046_000002.gene2949	tarseq_230_000003.gene904
SIN_1013926	515	AT1G02040.1	tarseq_1046_000002.gene2948	tarseq_230_000003.gene905
SIN_1013927	378	AT3G60580.1	tarseq_1046_000002.gene2947	tarseq_230_000003.gene906
SIN_1013928	809	AT3G15550.1	tarseq_1046_000002.gene2946	tarseq_230_000003.gene907
SIN_1013929	877	AT1G15510.1	tarseq_1046_000002.gene2945	tarseq_230_000003.gene908
SIN_1013930	255	AT2G45130.1	tarseq_1046_000002.gene2943	tarseq_230_000003.gene910
SIN_1013931	238	AT3G60600.1	tarseq_1046_000002.gene2942	tarseq_230_000003.gene911
SIN_1013932	393	AT3G60620.1	tarseq_1046_000002.gene2941	tarseq_230_000003.gene912
SIN_1013933	795	AT4G00150.1	tarseq_1046_000002.gene2940	tarseq_230_000003.gene913
SIN_1013934	144	NA	NA	NA
SIN_1013935	278	AT3G60660.1	tarseq_1046_000002.gene2939	tarseq_230_000003.gene914
SIN_1013936	129	AT4G00165.1	NA	NA
SIN_1013937	421	AT1G12200.1	tarseq_1046_000002.gene2938	tarseq_230_000003.gene915
SIN_1013938	62	NA	NA	NA
SIN_1013939	223	AT4G00170.1	tarseq_1046_000002.gene2937	tarseq_230_000003.gene916
SIN_1013940	248	AT3G60670.1	NA	tarseq_230_000003.gene917
SIN_1013941	482	AT3G60680.1	tarseq_1046_000002.gene2936	tarseq_230_000003.gene918
SIN_1013942	235	AT2G45200.1	tarseq_1046_000002.gene2934	tarseq_230_000003.gene920
SIN_1013943	172	AT3G60690.1	tarseq_1046_000002.gene2933	tarseq_230_000003.gene921
SIN_1013944	253	AT3G60720.1	tarseq_1046_000002.gene2932	tarseq_230_000003.gene922
SIN_1013945	591	AT2G45220.1	tarseq_1046_000002.gene2931	tarseq_230_000003.gene923
SIN_1013946	474	AT3G60730.1	tarseq_1046_000002.gene2930	tarseq_230_000003.gene924
SIN_1013947	386	AT2G45240.1	tarseq_1046_000002.gene2929	tarseq_230_000003.gene925
SIN_1013948	214	AT1G62770.1	tarseq_1046_000002.gene2928	tarseq_230_000003.gene926
SIN_1013949	585	AT1G02020.1	tarseq_1046_000002.gene2927	tarseq_230_000003.gene927
SIN_1013950	338	AT4G08900.1	tarseq_1046_000001.gene2924	tarseq_230_000003.gene928
SIN_1013951	603	AT1G32450.1	tarseq_1046_000001.gene2923	tarseq_4790_000001.gene15966
SIN_1013952	403	AT2G45270.1	tarseq_1046_000001.gene2922	tarseq_4790_000001.gene15967
SIN_1013953	367	AT2G45280.1	NA	NA
SIN_1013954	703	AT2G45290.1	tarseq_1046_000001.gene2921	tarseq_4790_000001.gene15968
SIN_1013955	519	AT2G45300.1	tarseq_1046_000001.gene2920	tarseq_4790_000001.gene15969
SIN_1013956	432	AT4G00110.1	tarseq_1046_000001.gene2919	tarseq_4790_000001.gene15970
SIN_1013957	900	AT2G45320.1	tarseq_1046_000001.gene2915	tarseq_4790_000001.gene15971
SIN_1013958	333	AT2G45400.1	tarseq_1046_000001.gene2912	tarseq_4790_000001.gene15975
SIN_1013959	670	AT2G45400.1	tarseq_1046_000001.gene2913	tarseq_4790_000001.gene15976
SIN_1013960	331	AT2G45400.1	tarseq_1046_000001.gene2911	tarseq_4790_000001.gene15978
SIN_1013961	561	AT1G02010.1	tarseq_1046_000001.gene2910	tarseq_4790_000001.gene15979
SIN_1013962	1107	AT4G00090.1	tarseq_1046_000001.gene2906	tarseq_4790_000001.gene15980
SIN_1013963	336	AT5G24530.1	tarseq_1046_000001.gene2905	tarseq_10830_000002.gene25542
SIN_1013964	313	AT4G12080.1	tarseq_1046_000001.gene2904	tarseq_10830_000002.gene25541
SIN_1013965	649	AT3G60850.1	tarseq_1046_000001.gene2903	tarseq_10830_000002.gene25540
SIN_1013966	201	AT4G00210.1	NA	NA
SIN_1013967	137	AT4G00220.1	NA	NA
SIN_1013968	1779	AT3G60860.1	tarseq_1046_000001.gene2901	tarseq_10830_000002.gene25538
SIN_1013969	203	AT1G24620.1	NA	NA
SIN_1013970	307	AT2G45430.1	tarseq_13105_000001.gene29064	tarseq_10830_000002.gene25537
SIN_1013971	895	AT1G01950.1	tarseq_13105_000001.gene29065	tarseq_10830_000002.gene25536
SIN_1013972	885	AT2G45460.2	tarseq_13105_000001.gene29066	tarseq_10830_000002.gene25535
SIN_1013973	137	NA	NA	NA
SIN_1013974	463	AT1G03940.1	tarseq_13105_000001.gene29068	tarseq_10830_000002.gene25533
SIN_1013975	425	AT1G03495.1	tarseq_13105_000002.gene29069	tarseq_10830_000002.gene25532
SIN_1013976	468	AT1G03495.1	tarseq_13105_000002.gene29070	tarseq_10830_000002.gene25531
SIN_1013977	697	AT1G01930.1	tarseq_13105_000002.gene29071	tarseq_10830_000002.gene25530
SIN_1013978	426	AT2G45470.1	tarseq_13105_000002.gene29072	tarseq_10830_000002.gene25529
SIN_1013979	444	AT2G45480.1	tarseq_13105_000003.gene29073	tarseq_10830_000001.gene25528
SIN_1013980	288	AT2G45490.1	tarseq_13105_000003.gene29074	tarseq_10830_000001.gene25527
SIN_1013981	471	AT2G45500.1	tarseq_3193_000002.gene12613	tarseq_12130_000001.gene27160
SIN_1013982	319	AT1G23740.1	tarseq_3193_000002.gene12614	tarseq_12130_000001.gene27161
SIN_1013983	514	AT2G45510.1	tarseq_3193_000002.gene12615	tarseq_12130_000001.gene27162
SIN_1013984	500	AT2G45510.1	tarseq_3193_000002.gene12616	tarseq_12130_000001.gene27163
SIN_1013985	2964	AT2G45540.1	tarseq_3193_000002.gene12618	tarseq_12130_000001.gene27165
SIN_1013986	491	AT2G45570.1	tarseq_3193_000002.gene12619	tarseq_12130_000001.gene27166
SIN_1013987	499	AT2G45580.1	tarseq_3193_000002.gene12620	tarseq_12130_000001.gene27167
SIN_1013988	499	AT2G45580.1	tarseq_3193_000002.gene12621	tarseq_12130_000001.gene27168
SIN_1013989	498	AT2G45580.1	tarseq_3193_000002.gene12622	tarseq_12130_000001.gene27169
SIN_1013990	526	AT3G61050.1	tarseq_3193_000002.gene12624	tarseq_12130_000001.gene27171
SIN_1013991	663	AT2G45590.1	tarseq_3193_000002.gene12625	tarseq_12130_000001.gene27172
SIN_1013992	341	AT2G45600.1	NA	NA
SIN_1013993	262	AT4G05230.1	tarseq_3193_000002.gene12626	tarseq_12130_000001.gene27173
SIN_1013994	359	AT2G45600.1	tarseq_1184_000001.gene6524	tarseq_1443_000001.gene7401
SIN_1013995	320	AT2G45610.1	tarseq_3193_000002.gene12628	tarseq_14072_000001.gene30236
SIN_1013996	729	AT2G45620.1	tarseq_3193_000002.gene12629	tarseq_14072_000001.gene30237
SIN_1013997	241	AT2G45660.1	tarseq_3193_000002.gene12630	tarseq_14072_000001.gene30238
SIN_1013998	370	AT2G45670.1	tarseq_3193_000002.gene12632	tarseq_14072_000002.gene30240
SIN_1013999	407	AT4G31010.1	tarseq_3193_000002.gene12633	tarseq_14072_000002.gene30241
SIN_1014000	802	AT1G01900.1	tarseq_3193_000002.gene12634	tarseq_14072_000002.gene30242
SIN_1014001	1110	AT2G42010.1	tarseq_3193_000002.gene12635	tarseq_14072_000002.gene30243
SIN_1014002	363	AT2G45680.1	tarseq_3193_000002.gene12636	tarseq_14072_000002.gene30244
SIN_1014003	723	AT1G01910.1	tarseq_3193_000002.gene12637	tarseq_14072_000002.gene30245
SIN_1014004	696	AT4G22990.1	NA	tarseq_3902_000001.gene13915
SIN_1014005	481	AT4G25440.1	tarseq_3193_000002.gene12639	tarseq_3902_000001.gene13917
SIN_1014006	566	AT1G01920.2	tarseq_3193_000002.gene12640	tarseq_3902_000001.gene13918
SIN_1014007	469	AT4G14480.1	tarseq_3193_000002.gene12641	tarseq_3902_000001.gene13919
SIN_1014008	396	AT4G14480.1	tarseq_3193_000002.gene12642	tarseq_3902_000001.gene13920
SIN_1014009	325	AT4G14480.1	tarseq_3193_000002.gene12643	tarseq_3902_000001.gene13921
SIN_1014010	286	NA	NA	NA
SIN_1014011	356	AT1G12600.1	tarseq_3193_000002.gene12644	tarseq_3902_000001.gene13922
SIN_1014012	384	NA	tarseq_3193_000002.gene12645	tarseq_3902_000001.gene13923
SIN_1014013	190	AT1G01880.1	tarseq_3193_000002.gene12646	tarseq_3902_000001.gene13924
SIN_1014014	659	AT4G16110.1	tarseq_3193_000002.gene12647	tarseq_3902_000001.gene13925
SIN_1014015	529	AT3G61080.1	tarseq_3193_000002.gene12650	tarseq_3902_000001.gene13928
SIN_1014016	272	NA	tarseq_3193_000002.gene12651	tarseq_3902_000001.gene13929
SIN_1014017	251	AT4G25500.1	tarseq_3193_000002.gene12652	tarseq_3902_000001.gene13930
SIN_1014018	560	AT2G45720.1	tarseq_3193_000002.gene12653	tarseq_3902_000001.gene13931
SIN_1014019	235	AT1G01820.1	tarseq_3193_000002.gene12654	tarseq_3902_000001.gene13932
SIN_1014020	349	AT4G00755.1	tarseq_3193_000002.gene12655	tarseq_3902_000001.gene13933
SIN_1014021	381	AT4G00755.1	tarseq_3193_000002.gene12656	tarseq_3902_000001.gene13934
SIN_1014022	645	AT4G00750.1	tarseq_3193_000002.gene12657	tarseq_3902_000001.gene13935
SIN_1014023	303	AT3G61060.2	tarseq_3193_000003.gene12659	tarseq_3902_000001.gene13936
SIN_1014024	881	AT2G24720.1	tarseq_3193_000003.gene12660	tarseq_3902_000001.gene13937
SIN_1014025	456	AT3G61140.1	tarseq_3193_000003.gene12661	tarseq_3902_000001.gene13938
SIN_1014026	597	AT4G00740.1	tarseq_3193_000003.gene12662	tarseq_3902_000001.gene13939
SIN_1014027	709	AT5G52170.1	NA	NA
SIN_1014028	443	AT4G00720.1	tarseq_3193_000005.gene12664	tarseq_3902_000001.gene13941
SIN_1014029	737	AT2G27610.1	tarseq_3193_000005.gene12665	tarseq_3902_000001.gene13942
SIN_1014030	436	AT4G11680.1	tarseq_3193_000005.gene12666	tarseq_3902_000001.gene13943
SIN_1014031	165	AT2G45760.1	tarseq_3193_000005.gene12667	tarseq_3902_000001.gene13944
SIN_1014032	504	AT4G32730.2	tarseq_3193_000005.gene12668	tarseq_3902_000001.gene13945
SIN_1014033	177	AT1G63220.1	tarseq_3193_000005.gene12669	tarseq_3902_000001.gene13946
SIN_1014034	463	AT4G00550.1	tarseq_3193_000005.gene12670	tarseq_3902_000001.gene13947
SIN_1014035	604	AT4G00570.1	tarseq_3193_000006.gene12671	tarseq_3902_000001.gene13948
SIN_1014036	580	AT3G61220.1	tarseq_3193_000006.gene12672	tarseq_3902_000001.gene13949
SIN_1014037	453	AT3G61220.1	tarseq_3193_000006.gene12676	tarseq_3902_000001.gene13953
SIN_1014038	105	NA	tarseq_3193_000006.gene12677	tarseq_3902_000001.gene13954
SIN_1014039	314	AT3G61220.1	tarseq_3193_000006.gene12678	tarseq_3902_000001.gene13955
SIN_1014040	108	NA	tarseq_3193_000006.gene12679	tarseq_3902_000001.gene13956
SIN_1014041	445	AT4G00590.1	tarseq_3193_000006.gene12680	tarseq_3902_000001.gene13957
SIN_1014042	366	AT4G00620.1	tarseq_3193_000006.gene12681	tarseq_3902_000001.gene13958
SIN_1014043	1180	AT4G00630.1	tarseq_3193_000006.gene12682	tarseq_3902_000001.gene13959
SIN_1014044	193	AT3G61230.1	NA	NA
SIN_1014045	110	NA	tarseq_3193_000006.gene12684	tarseq_3902_000001.gene13961
SIN_1014046	73	AT5G20165.1	NA	NA
SIN_1014047	709	AT2G38040.1	tarseq_3193_000006.gene12685	tarseq_3902_000001.gene13962
SIN_1014048	511	AT4G00660.2	tarseq_4985_000003.gene17023	tarseq_1464_000002.gene7454
SIN_1014049	304	AT3G61250.1	tarseq_3193_000006.gene12686	tarseq_3902_000001.gene13963
SIN_1014050	521	AT2G45830.1	tarseq_3193_000006.gene12688	tarseq_3902_000001.gene13965
SIN_1014051	468	AT3G48980.1	tarseq_3193_000006.gene12689	tarseq_3902_000001.gene13966
SIN_1014052	139	AT1G01750.1	tarseq_3193_000006.gene12690	tarseq_3902_000001.gene13967
SIN_1014053	313	AT3G48480.1	NA	NA
SIN_1014054	967	AT4G11610.1	tarseq_3193_000006.gene12691	tarseq_3902_000001.gene13968
SIN_1014055	189	NA	tarseq_3193_000006.gene12692	tarseq_3902_000001.gene13969
SIN_1014056	310	AT2G45850.1	tarseq_3193_000006.gene12697	tarseq_3902_000001.gene13974
SIN_1014057	82	NA	NA	NA
SIN_1014058	486	AT4G15900.1	tarseq_3193_000006.gene12699	tarseq_3902_000001.gene13976
SIN_1014059	161	AT1G01730.1	tarseq_3193_000006.gene12700	tarseq_3902_000001.gene13977
SIN_1014060	895	AT4G20960.1	tarseq_3193_000006.gene12701	tarseq_3902_000001.gene13978
SIN_1014061	146	NA	NA	NA
SIN_1014062	375	AT3G61350.1	tarseq_3193_000006.gene12703	tarseq_3902_000001.gene13980
SIN_1014063	97	NA	NA	NA
SIN_1014064	319	AT1G32360.1	tarseq_3193_000006.gene12704	tarseq_3902_000001.gene13981
SIN_1014065	57	NA	NA	NA
SIN_1014066	421	AT3G49050.1	tarseq_3193_000006.gene12705	tarseq_3902_000001.gene13982
SIN_1014067	433	AT4G00490.1	tarseq_3193_000006.gene12706	tarseq_3902_000001.gene13983
SIN_1014068	72	NA	NA	NA
SIN_1014069	328	AT4G23340.1	tarseq_3193_000006.gene12707	tarseq_3902_000002.gene13984
SIN_1014070	639	AT4G18750.1	tarseq_3193_000006.gene12708	tarseq_3902_000002.gene13985
SIN_1014071	464	AT4G00460.2	tarseq_3193_000006.gene12709	tarseq_3902_000002.gene13986
SIN_1014072	361	AT1G32360.1	tarseq_3193_000006.gene12710	tarseq_3902_000002.gene13987
SIN_1014073	2193	AT4G00450.1	tarseq_3193_000007.gene12711	tarseq_3902_000002.gene13988
SIN_1014074	309	AT1G01690.1	tarseq_3193_000007.gene12713	tarseq_3902_000003.gene13990
SIN_1014075	889	AT2G45910.1	tarseq_3193_000007.gene12714	tarseq_3902_000003.gene13991
SIN_1014076	444	AT1G01650.1	tarseq_3193_000007.gene12716	tarseq_3902_000003.gene13993
SIN_1014077	345	AT2G45950.1	tarseq_3193_000007.gene12717	tarseq_3902_000003.gene13994
SIN_1014078	285	AT4G00430.1	tarseq_18281_000001.gene36091	tarseq_14843_000001.gene31987
SIN_1014079	457	AT1G01610.1	NA	tarseq_14843_000001.gene31988
SIN_1014080	521	AT2G45970.1	tarseq_18281_000001.gene36093	tarseq_14843_000001.gene31989
SIN_1014081	592	AT4G29910.1	tarseq_18281_000001.gene36094	tarseq_14843_000001.gene31990
SIN_1014082	212	AT2G45990.1	tarseq_18281_000001.gene36095	tarseq_14843_000001.gene31991
SIN_1014083	200	AT2G46000.1	tarseq_18281_000001.gene36096	tarseq_14843_000001.gene31992
SIN_1014084	372	AT3G61440.1	NA	NA
SIN_1014085	2229	AT2G46020.2	tarseq_18281_000001.gene36097	tarseq_14843_000001.gene31993
SIN_1014086	183	AT1G63800.1	tarseq_18281_000001.gene36098	tarseq_14843_000001.gene31994
SIN_1014087	602	AT2G46040.1	tarseq_18281_000001.gene36099	tarseq_14843_000001.gene31995
SIN_1014088	506	AT4G00350.1	tarseq_18281_000001.gene36100	tarseq_14843_000001.gene31996
SIN_1014089	866	AT4G00340.1	tarseq_18281_000001.gene36101	tarseq_14843_000001.gene31997
SIN_1014090	438	AT4G00330.1	tarseq_18281_000001.gene36102	tarseq_14843_000001.gene31998
SIN_1014091	782	AT2G46060.1	tarseq_18237_000001.gene35943	tarseq_7416_000001.gene20925
SIN_1014092	381	AT1G63830.2	tarseq_18237_000001.gene35944	tarseq_7416_000001.gene20924
SIN_1014093	1126	AT5G28350.1	tarseq_18237_000001.gene35945	tarseq_7416_000001.gene20923
SIN_1014094	1394	AT1G01580.1	tarseq_2536_000001.gene10698	tarseq_4330_000002.gene14930
SIN_1014095	472	AT4G00300.2	tarseq_18237_000002.gene35949	tarseq_7416_000001.gene20920
SIN_1014096	504	AT1G01540.2	tarseq_18237_000002.gene35950	tarseq_7416_000001.gene20919
SIN_1014097	353	AT2G46080.1	tarseq_18237_000002.gene35951	NA
SIN_1014098	376	AT4G01370.1	tarseq_8124_000001.gene22462	tarseq_4585_000004.gene15514
SIN_1014099	472	AT3G61490.1	tarseq_3618_000003.gene13969	tarseq_3793_000003.gene13585
SIN_1014100	479	AT5G49690.1	tarseq_18237_000002.gene35954	tarseq_7416_000001.gene20916
SIN_1014101	449	AT4G00290.1	tarseq_18237_000002.gene35955	tarseq_7416_000001.gene20915
SIN_1014102	319	AT2G46090.1	NA	NA
SIN_1014103	264	AT4G01310.1	tarseq_8916_000001.gene23559	tarseq_12201_000002.gene27254
SIN_1014104	1104	AT4G01290.1	tarseq_8916_000001.gene23558	tarseq_14282_000001.gene30608
SIN_1014105	632	AT1G01510.1	tarseq_6202_000001.gene19464	tarseq_3126_000001.gene11978
SIN_1014106	150	AT5G64130.1	NA	NA
SIN_1014107	308	AT1G01500.1	tarseq_8916_000001.gene23556	tarseq_14282_000001.gene30606
SIN_1014108	195	AT1G01490.1	tarseq_8916_000001.gene23555	tarseq_14282_000001.gene30605
SIN_1014109	477	AT3G61510.1	tarseq_8916_000001.gene23554	tarseq_10732_000002.gene25413
SIN_1014110	585	AT4G01270.1	tarseq_8916_000001.gene23553	tarseq_10732_000001.gene25412
SIN_1014111	332	AT4G01250.1	tarseq_8916_000001.gene23552	tarseq_10732_000001.gene25411
SIN_1014112	742	AT3G61520.1	tarseq_8916_000001.gene23551	tarseq_10732_000001.gene25410
SIN_1014113	356	AT3G61530.1	tarseq_8916_000001.gene23550	tarseq_10732_000001.gene25409
SIN_1014114	516	AT3G61540.1	tarseq_8916_000001.gene23549	tarseq_10732_000001.gene25408
SIN_1014115	61	NA	NA	NA
SIN_1014116	238	AT1G14620.1	tarseq_7705_000002.gene21773	tarseq_12322_000001.gene27436
SIN_1014117	151	AT1G01470.1	tarseq_7705_000002.gene21772	tarseq_12322_000001.gene27437
SIN_1014118	617	AT4G01240.1	tarseq_7705_000002.gene21771	tarseq_12322_000001.gene27438
SIN_1014119	789	AT2G46180.1	tarseq_7705_000002.gene21769	tarseq_12322_000001.gene27440
SIN_1014120	699	AT2G46200.1	tarseq_7705_000001.gene21768	NA
SIN_1014121	448	AT2G46210.1	tarseq_7705_000001.gene21767	tarseq_12322_000001.gene27441
SIN_1014122	1037	AT4G01210.1	tarseq_7705_000001.gene21763	tarseq_12322_000001.gene27445
SIN_1014123	262	AT4G01200.1	tarseq_7705_000001.gene21762	tarseq_12322_000001.gene27446
SIN_1014124	405	AT3G61590.1	tarseq_7705_000001.gene21761	tarseq_12322_000001.gene27447
SIN_1014125	672	AT5G41620.1	tarseq_7705_000001.gene21760	tarseq_12322_000001.gene27448
SIN_1014126	145	AT2G04520.1	NA	NA
SIN_1014127	137	AT4G01150.1	tarseq_7705_000001.gene21758	tarseq_12322_000001.gene27451
SIN_1014128	281	AT4G01140.1	NA	NA
SIN_1014129	387	AT4G01130.1	tarseq_7705_000001.gene21757	tarseq_12322_000001.gene27452
SIN_1014130	364	AT4G01130.1	tarseq_7705_000001.gene21756	tarseq_12322_000001.gene27453
SIN_1014131	411	AT2G46270.1	tarseq_7705_000001.gene21755	tarseq_12322_000001.gene27454
SIN_1014132	366	AT3G61610.1	tarseq_7705_000001.gene21754	tarseq_12322_000001.gene27455
SIN_1014133	209	NA	NA	NA
SIN_1014134	403	AT2G46320.1	tarseq_1640_000001.gene7801	tarseq_12322_000001.gene27459
SIN_1014135	680	AT1G64300.1	tarseq_1640_000001.gene7803	tarseq_12322_000001.gene27461
SIN_1014136	117	NA	NA	NA
SIN_1014137	354	AT4G01100.1	tarseq_1640_000001.gene7804	tarseq_12322_000001.gene27462
SIN_1014138	580	AT2G46370.4	tarseq_1640_000001.gene7805	tarseq_12322_000001.gene27463
SIN_1014139	124	NA	tarseq_1640_000001.gene7806	tarseq_12322_000001.gene27464
SIN_1014140	1362	AT1G01430.1	tarseq_1640_000003.gene7807	tarseq_8387_000001.gene22506
SIN_1014141	476	AT4G01070.1	tarseq_1640_000003.gene7808	tarseq_12322_000003.gene27466
SIN_1014142	289	AT4G27250.1	tarseq_1640_000003.gene7809	tarseq_12322_000003.gene27467
SIN_1014143	350	AT4G11070.1	tarseq_1640_000003.gene7810	tarseq_4357_000001.gene15018
SIN_1014144	377	AT3G06240.1	tarseq_1640_000003.gene7811	tarseq_12322_000004.gene27469
SIN_1014145	777	AT1G05950.1	tarseq_1640_000003.gene7812	tarseq_12322_000004.gene27470
SIN_1014146	76	AT4G01060.1	NA	tarseq_12322_000004.gene27471
SIN_1014147	525	AT4G01037.1	tarseq_1640_000003.gene7813	tarseq_12322_000004.gene27472
SIN_1014148	927	AT4G01030.1	tarseq_1640_000003.gene7814	tarseq_12322_000004.gene27473
SIN_1014149	173	AT1G01360.1	tarseq_1640_000003.gene7816	tarseq_12322_000004.gene27475
SIN_1014150	1357	AT3G61690.1	tarseq_1640_000003.gene7817	tarseq_12322_000004.gene27476
SIN_1014151	804	AT5G63630.1	tarseq_1640_000003.gene7818	tarseq_12322_000004.gene27477
SIN_1014152	310	AT3G61700.1	NA	NA
SIN_1014153	649	AT4G23850.1	tarseq_1640_000003.gene7820	tarseq_12322_000004.gene27479
SIN_1014154	503	AT4G01000.1	tarseq_1640_000004.gene7823	tarseq_8387_000002.gene22529
SIN_1014155	857	AT2G25410.1	tarseq_1640_000004.gene7824	tarseq_12322_000004.gene27482
SIN_1014156	367	AT2G46495.1	NA	NA
SIN_1014157	363	AT2G46495.1	NA	NA
SIN_1014158	310	AT5G36000.1	NA	NA
SIN_1014159	763	AT1G78950.1	NA	tarseq_11887_000001.gene26918
SIN_1014160	1913	AT1G01320.2	tarseq_15409_000002.gene31872	tarseq_9255_000002.gene23582
SIN_1014161	1240	AT3G61780.1	tarseq_15409_000002.gene31867	tarseq_9255_000002.gene23577
SIN_1014162	323	AT3G61790.1	tarseq_15409_000002.gene31866	tarseq_9255_000002.gene23576
SIN_1014163	727	AT3G61800.1	tarseq_15409_000001.gene31865	tarseq_9255_000002.gene23575
SIN_1014164	478	AT1G01300.1	tarseq_15409_000001.gene31864	tarseq_9255_000002.gene23574
SIN_1014165	237	AT1G01290.1	NA	NA
SIN_1014166	482	AT1G01280.1	tarseq_9015_000001.gene23795	tarseq_9255_000002.gene23573
SIN_1014167	367	AT4G10920.1	tarseq_9015_000002.gene23796	tarseq_9255_000002.gene23572
SIN_1014168	971	AT2G46520.1	tarseq_5753_000002.gene18654	tarseq_3083_000001.gene11882
SIN_1014169	675	AT4G23980.1	tarseq_9015_000002.gene23799	tarseq_9255_000002.gene23569
SIN_1014170	239	NA	NA	NA
SIN_1014171	85	AT2G46540.1	NA	NA
SIN_1014172	453	NA	tarseq_9015_000002.gene23800	tarseq_9255_000002.gene23568
SIN_1014173	1098	AT1G01220.1	NA	NA
SIN_1014174	2296	AT2G46560.1	tarseq_9015_000002.gene23801	tarseq_9255_000002.gene23567
SIN_1014175	612	AT4G09510.1	tarseq_9015_000002.gene23802	tarseq_9255_000002.gene23566
SIN_1014176	514	AT5G08510.1	tarseq_9015_000002.gene23803	tarseq_9255_000002.gene23565
SIN_1014177	409	AT2G46570.1	tarseq_9015_000003.gene23804	tarseq_9255_000002.gene23564
SIN_1014178	910	AT3G18750.1	tarseq_9015_000003.gene23808	tarseq_9255_000002.gene23560
SIN_1014179	1051	AT4G00900.1	tarseq_9015_000003.gene23811	tarseq_9255_000002.gene23557
SIN_1014180	1000	AT1G76390.1	tarseq_9015_000003.gene23812	tarseq_9255_000002.gene23556
SIN_1014181	259	NA	tarseq_9015_000003.gene23813	tarseq_9255_000002.gene23555
SIN_1014182	247	AT1G01200.1	tarseq_9015_000003.gene23814	tarseq_9255_000002.gene23554
SIN_1014183	478	AT2G46620.1	tarseq_9015_000003.gene23815	tarseq_9255_000002.gene23553
SIN_1014184	442	AT2G46630.1	tarseq_9015_000003.gene23816	tarseq_9255_000002.gene23552
SIN_1014185	338	NA	tarseq_9015_000003.gene23817	tarseq_9255_000002.gene23551
SIN_1014186	267	NA	NA	NA
SIN_1014187	536	AT3G61880.2	tarseq_9015_000004.gene23818	tarseq_9255_000001.gene23550
SIN_1014188	56	AT2G36170.1	NA	NA
SIN_1014189	413	AT2G46700.1	tarseq_9015_000004.gene23820	tarseq_9255_000001.gene23548
SIN_1014190	201	AT2G46700.1	tarseq_9015_000004.gene23821	tarseq_9255_000001.gene23547
SIN_1014191	494	AT2G46710.1	tarseq_9015_000004.gene23823	tarseq_9255_000001.gene23546
SIN_1014192	473	AT4G00870.1	tarseq_9015_000004.gene23824	tarseq_9255_000001.gene23545
SIN_1014193	300	AT1G01180.1	tarseq_11363_000002.gene26955	tarseq_12017_000002.gene27083
SIN_1014194	142	NA	NA	NA
SIN_1014195	117	AT1G07770.1	NA	NA
SIN_1014196	50	NA	NA	NA
SIN_1017752	196	NA	tarseq_69_000002.gene255	tarseq_472_000006.gene1723
SIN_1017753	482	AT4G22910.1	tarseq_3058_000001.gene12093	tarseq_3135_000002.gene11998
SIN_1017754	381	NA	tarseq_3058_000001.gene12094	tarseq_44_000001.gene204
SIN_1017755	173	NA	NA	NA
SIN_1017756	370	NA	tarseq_2778_000001.gene11387	tarseq_1540_000002.gene7806
SIN_1017757	237	NA	tarseq_8616_000001.gene23117	tarseq_5359_000001.gene17164
SIN_1017758	76	NA	NA	NA
SIN_1017759	228	NA	tarseq_2778_000002.gene11391	tarseq_1540_000002.gene7803
SIN_1017760	198	NA	NA	tarseq_178_000001.gene678
SIN_1017761	102	NA	tarseq_4805_000002.gene16608	tarseq_178_000001.gene677
SIN_1017762	165	AT2G45660.1	tarseq_1023_000001.gene2863	tarseq_4041_000001.gene14274
SIN_1017763	61	AT4G11880.1	tarseq_1023_000001.gene2864	tarseq_4041_000001.gene14273
SIN_1017764	152	ATCG00480.1	NA	NA
SIN_1017765	171	NA	NA	NA
SIN_1017766	91	NA	NA	NA
SIN_1017767	616	AT4G11860.1	tarseq_1023_000003.gene2872	tarseq_4030_000001.gene14240
SIN_1017768	236	AT3G48010.1	tarseq_1023_000003.gene2873	tarseq_4030_000001.gene14241
SIN_1017769	287	AT3G48010.1	tarseq_1023_000003.gene2874	tarseq_4030_000001.gene14242
SIN_1017770	135	NA	NA	NA
SIN_1017771	95	NA	NA	NA
SIN_1017772	136	NA	NA	NA
SIN_1017773	471	NA	tarseq_8798_000001.gene23370	tarseq_4030_000001.gene14249
SIN_1017774	89	NA	tarseq_1358_000001.gene6977	tarseq_1550_000001.gene7825
SIN_1017775	83	NA	NA	NA
SIN_1017776	85	NA	NA	NA
SIN_1017777	77	NA	tarseq_2431_000001.gene10167	tarseq_4030_000001.gene14254
SIN_1017778	295	AT1G62990.1	tarseq_18222_000001.gene35899	tarseq_4030_000001.gene14258
SIN_1017779	68	NA	NA	NA
SIN_1017780	292	NA	tarseq_2533_000002.gene10656	tarseq_751_000002.gene5095
SIN_1017781	164	NA	NA	NA
SIN_1017782	850	AT2G42010.1	tarseq_3676_000001.gene14111	tarseq_1096_000001.gene6195
SIN_1017783	300	AT1G63000.1	tarseq_3004_000002.gene11972	tarseq_3151_000001.gene12023
SIN_1017784	464	AT4G11820.2	tarseq_1267_000001.gene6727	tarseq_5178_000001.gene16685
SIN_1017785	240	NA	NA	NA
SIN_1017786	263	NA	tarseq_1770_000001.gene8226	tarseq_9269_000001.gene23593
SIN_1017787	411	AT1G12570.1	tarseq_1267_000001.gene6723	tarseq_7645_000001.gene21248
SIN_1017788	748	AT4G11810.1	tarseq_1267_000001.gene6722	tarseq_7450_000001.gene20973
SIN_1017789	92	NA	NA	tarseq_1084_000001.gene6163
SIN_1017790	254	NA	NA	NA
SIN_1017791	85	NA	tarseq_3170_000001.gene12471	tarseq_1084_000001.gene6164
SIN_1017792	356	AT4G23010.1	tarseq_3170_000002.gene12473	tarseq_1084_000002.gene6165
SIN_1017793	368	NA	tarseq_1950_000001.gene8788	tarseq_1843_000002.gene8545
SIN_1017794	115	NA	NA	NA
SIN_1017795	311	NA	tarseq_5915_000001.gene18940	tarseq_8065_000001.gene21837
SIN_1017796	541	AT5G23370.1	tarseq_3920_000002.gene14621	NA
SIN_1017797	545	AT1G36280.1	tarseq_10275_000001.gene25453	tarseq_3828_000001.gene13747
SIN_1017798	475	NA	tarseq_10275_000001.gene25452	tarseq_3828_000001.gene13748
SIN_1017799	91	NA	NA	NA
SIN_1017800	79	NA	NA	NA
SIN_1017801	187	AT1G12610.1	tarseq_9063_000001.gene23928	tarseq_3828_000001.gene13749
SIN_1017802	748	AT3G52990.2	tarseq_3215_000001.gene12745	tarseq_638_000001.gene2202
SIN_1017803	165	AT3G52990.1	NA	tarseq_3828_000001.gene13750
SIN_1017804	81	NA	NA	NA
SIN_1017805	222	AT5G52020.1	tarseq_4222_000001.gene15374	tarseq_9855_000001.gene24368
SIN_1017806	144	NA	NA	NA
SIN_1017807	1040	AT2G16950.2	tarseq_25_000001.gene67	tarseq_977_000001.gene5904
SIN_1017808	154	NA	NA	NA
SIN_1017809	285	AT5G52060.1	tarseq_4222_000003.gene15382	tarseq_2005_000004.gene9005
SIN_1017810	593	AT1G12640.1	tarseq_4215_000001.gene15359	tarseq_5965_000002.gene18230
SIN_1017811	95	NA	NA	tarseq_5965_000002.gene18229
SIN_1017812	121	NA	tarseq_4215_000001.gene15362	tarseq_5965_000002.gene18228
SIN_1017813	379	NA	NA	tarseq_5965_000002.gene18226
SIN_1017814	76	NA	NA	NA
SIN_1017815	245	AT1G12650.1	tarseq_4215_000002.gene15367	tarseq_5965_000002.gene18224
SIN_1017816	289	AT1G12710.1	tarseq_4215_000002.gene15368	tarseq_5965_000002.gene18223
SIN_1017817	672	AT1G63100.1	tarseq_582_000002.gene1723	tarseq_5965_000001.gene18222
SIN_1017818	597	AT4G11740.1	tarseq_582_000002.gene1722	tarseq_5965_000001.gene18221
SIN_1017819	404	AT1G63110.1	NA	NA
SIN_1017820	764	AT4G11720.1	tarseq_582_000001.gene1717	tarseq_5965_000001.gene18217
SIN_1017821	82	NA	NA	NA
SIN_1017822	172	NA	tarseq_6381_000001.gene19791	tarseq_7169_000001.gene20519
SIN_1017823	457	AT4G23060.1	tarseq_6381_000002.gene19792	tarseq_1912_000001.gene8696
SIN_1017824	329	AT1G63120.1	tarseq_6381_000002.gene19793	tarseq_1912_000001.gene8695
SIN_1017825	63	NA	NA	NA
SIN_1017826	163	AT3G53020.1	tarseq_6381_000002.gene19796	tarseq_1912_000001.gene8692
SIN_1017827	175	NA	tarseq_6381_000002.gene19797	tarseq_1912_000001.gene8691
SIN_1017828	321	AT4G11660.1	tarseq_4211_000001.gene15350	tarseq_11690_000001.gene26672
SIN_1017829	487	AT1G32500.1	tarseq_7937_000002.gene22216	tarseq_4241_000002.gene14721
SIN_1017830	710	AT5G46580.1	tarseq_7937_000002.gene22215	tarseq_4241_000002.gene14722
SIN_1017831	349	AT1G12780.1	tarseq_7937_000002.gene22214	tarseq_4241_000002.gene14723
SIN_1017832	198	NA	tarseq_3217_000002.gene12754	tarseq_4241_000002.gene14726
SIN_1017833	72	NA	NA	NA
SIN_1017834	222	AT4G11650.1	tarseq_3133_000001.gene12326	tarseq_4241_000003.gene14730
SIN_1017835	78	NA	NA	NA
SIN_1017836	428	AT2G16050.1	tarseq_3133_000002.gene12330	tarseq_4241_000003.gene14731
SIN_1017837	100	NA	NA	NA
SIN_1017838	226	AT4G11650.1	tarseq_3493_000001.gene13672	tarseq_5419_000002.gene17272
SIN_1017839	223	AT4G11650.1	tarseq_3685_000001.gene14127	tarseq_7627_000002.gene21207
SIN_1017840	644	NA	tarseq_9288_000001.gene24296	tarseq_7627_000002.gene21211
SIN_1017841	141	NA	tarseq_9288_000001.gene24297	NA
SIN_1017842	123	NA	NA	NA
SIN_1017843	81	NA	NA	NA
SIN_1017844	104	NA	NA	NA
SIN_1017845	164	AT4G31360.1	tarseq_7240_000001.gene21130	tarseq_6902_000001.gene20034
SIN_1017846	238	AT1G63260.1	NA	NA
SIN_1017847	378	AT4G00660.2	NA	NA
SIN_1017848	359	NA	tarseq_7149_000001.gene20990	tarseq_1464_000002.gene7453
SIN_1017849	206	AT3G61230.1	tarseq_7149_000001.gene20989	tarseq_1464_000002.gene7452
SIN_1017850	108	NA	NA	NA
SIN_1017851	102	NA	tarseq_7149_000001.gene20987	tarseq_1464_000002.gene7449
SIN_1017852	132	NA	tarseq_8029_000001.gene22309	tarseq_12724_000001.gene28029
SIN_1017853	63	NA	NA	NA
SIN_1017854	75	NA	NA	NA
SIN_1017855	1005	AT1G63300.1	tarseq_13972_000001.gene30105	tarseq_529_000001.gene1839
SIN_1017856	204	AT3G14260.1	tarseq_13972_000001.gene30106	tarseq_529_000001.gene1840
SIN_1017857	137	NA	NA	NA
SIN_1017858	92	NA	NA	tarseq_14146_000001.gene30375
SIN_1017859	205	AT3G14260.1	tarseq_14232_000004.gene30455	tarseq_4269_000001.gene14789
SIN_1017860	649	AT1G63430.1	tarseq_1426_000002.gene7194	tarseq_4269_000001.gene14788
SIN_1017861	630	AT5G41190.1	tarseq_1426_000001.gene7193	tarseq_4269_000001.gene14787
SIN_1017862	445	AT5G23860.1	tarseq_1426_000001.gene7191	tarseq_457_000001.gene1685
SIN_1017863	250	AT5G41210.1	tarseq_1426_000001.gene7190	tarseq_457_000001.gene1686
SIN_1017864	445	AT5G23860.1	tarseq_1426_000001.gene7188	tarseq_457_000001.gene1687
SIN_1017865	271	AT5G41210.1	tarseq_1426_000001.gene7187	tarseq_457_000001.gene1688
SIN_1017866	267	AT5G41210.1	tarseq_13141_000002.gene29142	tarseq_273_000001.gene1045
SIN_1017867	106	AT4G11600.1	NA	NA
SIN_1017868	459	NA	tarseq_47_000001.gene162	tarseq_39_000001.gene169
SIN_1017869	165	AT1G63460.1	tarseq_2396_000001.gene10072	tarseq_805_000001.gene5251
SIN_1017870	125	NA	NA	NA
SIN_1017871	368	AT1G63470.1	tarseq_2396_000001.gene10070	tarseq_805_000001.gene5249
SIN_1017872	91	NA	tarseq_2396_000001.gene10069	tarseq_805_000001.gene5248
SIN_1017873	367	AT1G63470.1	tarseq_2396_000001.gene10068	tarseq_805_000001.gene5247
SIN_1017874	421	NA	tarseq_2396_000001.gene10067	tarseq_805_000001.gene5246
SIN_1017875	1764	AT1G63490.1	tarseq_2396_000001.gene10065	tarseq_805_000001.gene5244
SIN_1017876	118	NA	tarseq_3172_000002.gene12482	tarseq_7428_000001.gene20954
SIN_1017877	90	NA	NA	NA
SIN_1017878	222	NA	NA	NA
SIN_1017879	379	AT2G39510.1	tarseq_12579_000001.gene28392	tarseq_14786_000001.gene31775
SIN_1017880	572	AT5G13660.1	tarseq_12579_000001.gene28391	tarseq_14786_000001.gene31776
SIN_1017881	526	AT4G23100.1	tarseq_12579_000001.gene28390	tarseq_14786_000001.gene31777
SIN_1017882	127	NA	NA	NA
SIN_1017883	751	NA	tarseq_2431_000001.gene10164	tarseq_1222_000002.gene6594
SIN_1017884	381	AT4G11570.1	tarseq_12579_000001.gene28389	tarseq_429_000001.gene1625
SIN_1017885	608	AT4G11560.1	tarseq_12579_000001.gene28387	tarseq_11638_000001.gene26578
SIN_1017886	700	AT4G11450.1	tarseq_3154_000001.gene12384	tarseq_2403_000002.gene10214
SIN_1017887	905	AT1G63640.2	tarseq_3154_000001.gene12383	tarseq_2403_000002.gene10213
SIN_1017888	88	NA	NA	NA
SIN_1017889	643	AT5G41315.1	tarseq_3154_000001.gene12381	tarseq_2403_000001.gene10211
SIN_1017890	754	AT2G45900.1	tarseq_3154_000001.gene12379	tarseq_4405_000001.gene15114
SIN_1017891	822	AT1G63680.1	tarseq_1788_000001.gene8254	tarseq_1730_000001.gene8336
SIN_1017892	422	NA	tarseq_1788_000001.gene8255	tarseq_1730_000001.gene8337
SIN_1017893	215	AT1G48120.1	tarseq_4993_000001.gene17069	tarseq_1730_000001.gene8339
SIN_1017894	288	AT4G00430.1	tarseq_707_000001.gene2010	tarseq_1730_000002.gene8340
SIN_1017895	143	NA	NA	tarseq_1730_000002.gene8341
SIN_1017896	315	AT4G23430.2	tarseq_707_000001.gene2011	tarseq_1730_000002.gene8343
SIN_1017897	545	AT4G00360.1	tarseq_707_000001.gene2012	tarseq_1730_000002.gene8344
SIN_1017898	93	NA	tarseq_707_000001.gene2014	tarseq_3690_000001.gene13248
SIN_1017899	460	AT5G41330.1	tarseq_901_000001.gene2484	tarseq_1172_000001.gene6419
SIN_1017900	455	AT5G52430.1	tarseq_901_000001.gene2483	tarseq_1172_000001.gene6420
SIN_1017901	1078	AT1G63770.3	tarseq_12781_000001.gene28623	tarseq_5881_000001.gene18135
SIN_1017902	183	AT1G63800.1	tarseq_5271_000003.gene17607	tarseq_12767_000001.gene28133
SIN_1017903	294	AT4G11400.1	NA	NA
SIN_1017904	434	AT4G11400.1	tarseq_5271_000003.gene17608	tarseq_6703_000001.gene19640
SIN_1017905	226	AT1G19330.2	tarseq_5271_000003.gene17609	tarseq_6703_000002.gene19641
SIN_1017906	230	AT1G75060.2	tarseq_8334_000002.gene22745	tarseq_14488_000002.gene31005
SIN_1017907	896	AT4G23460.1	tarseq_3618_000001.gene13960	tarseq_3793_000001.gene13576
SIN_1017908	755	AT5G41360.1	tarseq_3618_000001.gene13961	tarseq_3793_000001.gene13577
SIN_1017909	57	NA	NA	NA
SIN_1017910	284	NA	NA	NA
SIN_1017911	261	AT5G41380.1	NA	NA
SIN_1017912	169	AT3G61460.1	tarseq_6265_000001.gene19611	tarseq_5332_000002.gene17045
SIN_1017913	204	NA	NA	NA
SIN_1017914	83	NA	NA	NA
SIN_1017915	587	AT1G63850.1	tarseq_11086_000001.gene26632	tarseq_5332_000003.gene17047
SIN_1017916	325	AT3G05170.1	tarseq_11086_000001.gene26633	tarseq_5332_000003.gene17048
SIN_1017917	602	AT5G41410.1	tarseq_11086_000001.gene26634	tarseq_14825_000001.gene31891
SIN_1017918	524	AT5G41460.1	tarseq_11086_000002.gene26635	tarseq_14825_000001.gene31892
SIN_1017919	49	NA	NA	NA
SIN_1017920	82	NA	NA	NA
SIN_1017921	105	NA	NA	NA
SIN_1017922	713	AT3G03580.1	tarseq_15740_000001.gene32249	tarseq_12325_000002.gene27484
SIN_1017923	317	AT1G63910.1	tarseq_15740_000001.gene32250	tarseq_12325_000002.gene27483
SIN_1017924	133	NA	tarseq_15740_000001.gene32251	tarseq_14646_000001.gene31367
SIN_1017925	486	AT1G63940.2	tarseq_16108_000001.gene32725	tarseq_14816_000001.gene31873
SIN_1017926	113	NA	tarseq_16108_000002.gene32726	tarseq_7628_000002.gene21214
SIN_1017927	81	NA	tarseq_16108_000002.gene32728	NA
SIN_1017928	247	NA	NA	NA
SIN_1017929	481	AT3G61510.1	tarseq_2344_000003.gene9938	tarseq_2012_000004.gene9039
SIN_1017930	199	ATCG00170.1	NA	tarseq_2012_000003.gene9038
SIN_1017931	240	NA	tarseq_1361_000003.gene7004	tarseq_1589_000001.gene7956
SIN_1017932	234	AT1G63970.1	tarseq_1361_000003.gene7003	tarseq_2012_000003.gene9036
SIN_1017933	69	AT5G41560.1	NA	NA
SIN_1017934	814	AT5G41580.1	tarseq_1361_000003.gene7002	tarseq_2012_000003.gene9035
SIN_1017935	646	AT1G64050.1	tarseq_1361_000003.gene7001	tarseq_2012_000003.gene9034
SIN_1017936	218	AT2G38640.1	tarseq_1361_000003.gene7000	tarseq_2012_000003.gene9033
SIN_1017937	182	AT2G46150.1	tarseq_1361_000002.gene6999	tarseq_2012_000003.gene9032
SIN_1017938	182	AT2G46150.1	NA	tarseq_2012_000003.gene9031
SIN_1017939	182	AT2G46150.1	NA	tarseq_2012_000003.gene9030
SIN_1017940	182	AT2G46150.1	tarseq_1361_000002.gene6998	tarseq_2012_000003.gene9029
SIN_1017941	202	AT2G46150.1	tarseq_1361_000002.gene6997	tarseq_2012_000003.gene9028
SIN_1017942	406	AT1G64080.1	tarseq_1361_000002.gene6996	tarseq_2012_000003.gene9027
SIN_1017943	248	AT4G11220.1	tarseq_1361_000002.gene6995	tarseq_2012_000003.gene9026
SIN_1017944	829	AT1G64110.2	tarseq_1361_000002.gene6994	tarseq_2012_000003.gene9025
SIN_1017945	369	AT5G60750.1	tarseq_1361_000002.gene6993	tarseq_2012_000003.gene9024
SIN_1017946	536	AT4G23650.1	tarseq_1361_000001.gene6991	tarseq_2012_000003.gene9022
SIN_1017947	273	AT3G57360.1	tarseq_1361_000001.gene6990	tarseq_2012_000003.gene9021
SIN_1017948	603	AT1G64140.1	tarseq_1361_000001.gene6989	tarseq_2012_000003.gene9020
SIN_1017949	187	AT4G23690.1	tarseq_1361_000001.gene6988	tarseq_2012_000003.gene9019
SIN_1017950	182	AT1G64160.1	tarseq_10369_000001.gene25558	tarseq_2012_000003.gene9017
SIN_1017951	801	AT5G41610.1	tarseq_10369_000001.gene25559	tarseq_2012_000003.gene9016
SIN_1017952	382	NA	tarseq_14830_000002.gene31212	tarseq_2012_000001.gene9015
SIN_1017953	480	AT2G38290.1	tarseq_14830_000002.gene31211	tarseq_14620_000001.gene31308
SIN_1017954	544	AT3G61600.2	tarseq_14417_000002.gene30656	tarseq_14382_000001.gene30794
SIN_1017955	488	AT5G41670.1	tarseq_14417_000002.gene30657	tarseq_14382_000001.gene30793
SIN_1017956	344	AT5G53340.1	tarseq_14417_000002.gene30658	tarseq_12544_000002.gene27782
SIN_1017957	61	NA	NA	NA
SIN_1017958	631	AT4G23740.1	tarseq_14417_000002.gene30659	tarseq_12544_000002.gene27781
SIN_1017959	329	AT4G23750.1	tarseq_14417_000002.gene30660	tarseq_12544_000001.gene27780
SIN_1017960	80	NA	NA	NA
SIN_1017961	88	NA	NA	tarseq_13063_000001.gene28541
SIN_1017962	94	AT5G41761.1	tarseq_4301_000003.gene15614	tarseq_4678_000002.gene15784
SIN_1017963	1064	AT4G11110.1	tarseq_4740_000001.gene16509	tarseq_14666_000001.gene31422
SIN_1017964	705	AT5G53220.1	tarseq_4740_000002.gene16510	tarseq_14666_000001.gene31423
SIN_1017965	529	AT1G52640.1	tarseq_4740_000002.gene16511	tarseq_14666_000001.gene31424
SIN_1017966	697	AT5G41770.1	tarseq_2083_000002.gene9163	tarseq_958_000002.gene5776
SIN_1017967	754	AT1G64320.1	tarseq_13130_000001.gene29105	tarseq_3276_000001.gene12375
SIN_1017968	1809	AT5G41790.1	tarseq_13130_000001.gene29106	tarseq_3276_000002.gene12376
SIN_1017969	376	AT4G01100.1	tarseq_13130_000001.gene29107	tarseq_3276_000002.gene12377
SIN_1017970	99	NA	tarseq_13130_000001.gene29108	tarseq_3276_000002.gene12378
SIN_1017971	937	AT3G61670.1	tarseq_13130_000001.gene29109	tarseq_3276_000002.gene12379
SIN_1017972	442	AT4G11090.1	tarseq_10407_000001.gene25630	tarseq_3276_000002.gene12380
SIN_1017973	163	AT5G41810.1	tarseq_13130_000001.gene29111	tarseq_3276_000002.gene12381
SIN_1017974	173	AT1G64355.1	tarseq_17867_000002.gene35004	tarseq_7858_000001.gene21613
SIN_1017975	330	AT4G23810.1	tarseq_13130_000001.gene29112	tarseq_3276_000002.gene12382
SIN_1017976	207	NA	tarseq_2706_000001.gene11239	tarseq_3276_000002.gene12383
SIN_1017977	412	AT4G23820.1	tarseq_2706_000001.gene11240	tarseq_3276_000002.gene12384
SIN_1017978	297	AT1G64380.1	tarseq_2706_000002.gene11241	tarseq_3276_000002.gene12385
SIN_1021393	74	NA	NA	NA
SIN_1021394	161	AT1G29140.1	tarseq_1094_000001.gene6267	tarseq_4082_000001.gene14359
SIN_1021395	70	NA	NA	NA
SIN_1021396	298	NA	NA	NA
SIN_1021397	106	NA	NA	NA
SIN_1021398	191	AT4G22830.1	tarseq_6963_000001.gene20730	tarseq_968_000003.gene5867
SIN_1021399	148	NA	tarseq_6963_000001.gene20731	tarseq_968_000003.gene5866
SIN_1021400	75	NA	tarseq_6963_000001.gene20734	NA
SIN_1021401	247	NA	NA	tarseq_1823_000001.gene8517
SIN_1021402	169	AT1G12440.1	tarseq_2471_000003.gene10433	tarseq_1823_000001.gene8519
SIN_1021403	919	AT1G12430.2	tarseq_13580_000002.gene29654	tarseq_2812_000004.gene11324
SIN_1021404	306	AT1G64260.1	tarseq_25_000001.gene68	tarseq_28_000001.gene89
SIN_1021405	61	NA	NA	NA
SIN_1021406	145	NA	tarseq_9930_000001.gene25039	tarseq_6533_000001.gene19339
SIN_1021407	209	NA	NA	NA
SIN_1021408	255	AT4G22810.1	NA	NA
SIN_1021409	77	NA	NA	NA
SIN_1021410	161	NA	tarseq_59_000001.gene212	tarseq_531_000001.gene1843
SIN_1021411	264	AT4G12060.1	NA	NA
SIN_1021412	203	NA	tarseq_59_000001.gene214	tarseq_531_000001.gene1841
SIN_1021413	369	AT1G12420.1	NA	NA
SIN_1021414	364	NA	tarseq_59_000002.gene219	tarseq_1205_000002.gene6521
SIN_1021415	54	NA	NA	NA
SIN_1021416	329	AT4G12080.1	tarseq_6324_000001.gene19734	tarseq_6578_000001.gene19459
SIN_1021417	120	NA	tarseq_10054_000001.gene25182	tarseq_10742_000002.gene25421
SIN_1021418	98	NA	NA	NA
SIN_1021419	100	NA	NA	NA
SIN_1021420	286	AT1G12390.1	tarseq_4542_000001.gene16092	tarseq_5480_000001.gene17394
SIN_1021421	53	NA	NA	NA
SIN_1021422	104	NA	NA	NA
SIN_1021423	95	NA	NA	NA
SIN_1021424	199	NA	NA	tarseq_4451_000002.gene15157
SIN_1021425	524	AT3G54700.1	tarseq_3827_000002.gene14451	tarseq_4026_000001.gene14235
SIN_1021426	510	NA	tarseq_3827_000003.gene14452	tarseq_4026_000001.gene14234
SIN_1021427	266	AT4G22758.1	tarseq_2339_000003.gene9932	tarseq_377_000001.gene1418
SIN_1021428	269	NA	tarseq_2339_000003.gene9929	tarseq_8449_000001.gene22602
SIN_1021429	295	AT4G22756.1	tarseq_1079_000001.gene3062	tarseq_6785_000002.gene19714
SIN_1021430	61	NA	NA	NA
SIN_1021431	58	NA	NA	NA
SIN_1021432	810	AT1G62870.1	tarseq_17019_000002.gene33786	tarseq_2353_000005.gene10009
SIN_1021433	290	AT1G12360.1	tarseq_11731_000001.gene27396	tarseq_5405_000001.gene17252
SIN_1021434	255	AT1G12360.1	tarseq_11731_000001.gene27397	tarseq_5405_000001.gene17253
SIN_1021435	458	AT1G12330.1	tarseq_196_000001.gene620	tarseq_5405_000001.gene17256
SIN_1021436	515	AT4G12300.1	tarseq_6793_000001.gene20499	tarseq_9043_000001.gene23241
SIN_1021437	145	AT1G26550.1	tarseq_6793_000001.gene20497	tarseq_7474_000001.gene21001
SIN_1021438	175	AT2G03210.1	tarseq_5356_000002.gene17794	tarseq_7474_000001.gene21000
SIN_1021439	233	AT1G62850.2	tarseq_4084_000001.gene15014	tarseq_1994_000001.gene8944
SIN_1021440	217	AT2G45360.1	tarseq_4084_000001.gene15013	tarseq_1994_000001.gene8943
SIN_1021441	104	NA	NA	NA
SIN_1021442	505	AT4G12320.1	tarseq_3461_000003.gene13601	tarseq_3268_000001.gene12361
SIN_1021443	393	ATCG01110.1	tarseq_16410_000002.gene33078	NA
SIN_1021444	195	AT4G12310.1	tarseq_8732_000001.gene23273	tarseq_1257_000003.gene6732
SIN_1021445	548	AT4G12300.1	tarseq_5053_000001.gene17181	tarseq_1257_000001.gene6728
SIN_1021446	507	AT4G12300.1	tarseq_5053_000001.gene17175	tarseq_1257_000001.gene6722
SIN_1021447	507	AT4G12320.1	tarseq_12274_000001.gene28065	tarseq_1257_000001.gene6720
SIN_1021448	507	AT4G12320.1	tarseq_1248_000001.gene6683	tarseq_4699_000001.gene15852
SIN_1021449	106	NA	tarseq_1248_000001.gene6682	tarseq_5374_000001.gene17197
SIN_1021450	507	AT4G12320.1	tarseq_4654_000001.gene16274	tarseq_212_000001.gene758
SIN_1021451	51	NA	tarseq_11234_000001.gene26805	tarseq_2697_000001.gene10980
SIN_1021452	823	AT3G07040.1	tarseq_11234_000001.gene26806	tarseq_2697_000001.gene10981
SIN_1021453	83	NA	tarseq_11234_000001.gene26807	tarseq_2697_000001.gene10982
SIN_1021454	507	AT4G12300.1	tarseq_11234_000001.gene26809	tarseq_2697_000001.gene10984
SIN_1021455	181	NA	NA	NA
SIN_1021456	493	AT4G12300.1	tarseq_2725_000001.gene11301	tarseq_6293_000001.gene18880
SIN_1021457	507	AT4G12300.1	tarseq_2478_000001.gene10451	tarseq_1079_000002.gene6148
SIN_1021458	102	AT1G74270.1	tarseq_2478_000001.gene10448	tarseq_1079_000002.gene6145
SIN_1021459	363	AT1G21280.1	tarseq_232_000001.gene770	tarseq_145_000004.gene519
SIN_1021460	495	AT1G66920.1	tarseq_8957_000001.gene23609	tarseq_9753_000002.gene24281
SIN_1021461	336	AT1G66980.1	tarseq_8957_000001.gene23610	tarseq_9753_000002.gene24282
SIN_1021462	216	NA	tarseq_11723_000001.gene27394	tarseq_11050_000001.gene25877
SIN_1021463	269	AT4G22680.1	tarseq_11723_000001.gene27392	tarseq_11050_000001.gene25875
SIN_1021464	394	AT4G22670.1	tarseq_5312_000001.gene17694	tarseq_5692_000001.gene17719
SIN_1021465	145	NA	tarseq_5312_000001.gene17695	tarseq_5692_000001.gene17718
SIN_1021466	111	AT1G62770.1	tarseq_2575_000001.gene10919	tarseq_5692_000001.gene17716
SIN_1021467	227	NA	tarseq_2645_000004.gene11116	tarseq_4118_000001.gene14424
SIN_1021468	263	NA	tarseq_8250_000001.gene22666	tarseq_3633_000001.gene13040
SIN_1021469	304	AT1G62730.1	tarseq_3435_000002.gene13478	tarseq_9499_000001.gene23874
SIN_1021470	534	AT1G62710.1	tarseq_3435_000002.gene13475	tarseq_1343_000001.gene7069
SIN_1021471	95	NA	tarseq_3435_000002.gene13473	tarseq_1343_000001.gene7071
SIN_1021472	255	NA	NA	NA
SIN_1021473	514	AT4G12320.1	tarseq_3435_000001.gene13471	tarseq_1343_000002.gene7073
SIN_1021474	590	AT5G44620.1	tarseq_8239_000001.gene22656	tarseq_9737_000001.gene24245
SIN_1021475	166	AT4G22620.1	tarseq_8239_000001.gene22659	tarseq_9737_000001.gene24248
SIN_1021476	275	AT5G11260.1	tarseq_11371_000002.gene26981	tarseq_9737_000001.gene24249
SIN_1021477	348	AT5G11270.1	tarseq_11371_000002.gene26980	tarseq_9737_000001.gene24250
SIN_1021478	169	AT5G11280.1	NA	NA
SIN_1021479	576	AT2G26280.1	tarseq_11371_000002.gene26979	tarseq_9737_000001.gene24251
SIN_1021480	137	AT1G72510.1	tarseq_11371_000001.gene26978	tarseq_9737_000001.gene24252
SIN_1021481	322	AT1G48270.1	tarseq_11371_000001.gene26977	tarseq_9737_000001.gene24253
SIN_1021482	290	AT4G33180.1	tarseq_11371_000001.gene26976	tarseq_9737_000001.gene24254
SIN_1021483	969	AT2G26330.1	tarseq_11371_000001.gene26974	tarseq_9737_000001.gene24256
SIN_1021484	947	AT4G33210.1	tarseq_11371_000001.gene26973	tarseq_9737_000002.gene24258
SIN_1021485	283	NA	NA	NA
SIN_1021486	418	AT5G21482.1	tarseq_6016_000002.gene19190	tarseq_7572_000001.gene21068
SIN_1021487	132	NA	NA	NA
SIN_1021488	321	NA	tarseq_5663_000003.gene18395	tarseq_13509_000001.gene29245
SIN_1021489	242	AT5G19530.2	NA	tarseq_13509_000001.gene29244
SIN_1021490	771	AT5G12080.1	tarseq_5663_000002.gene18394	tarseq_13509_000001.gene29243
SIN_1021491	406	NA	tarseq_5663_000002.gene18393	tarseq_606_000001.gene2054
SIN_1021492	307	AT5G12040.1	tarseq_1655_000001.gene7883	tarseq_215_000007.gene776
SIN_1021493	345	AT1G72830.1	tarseq_5663_000002.gene18391	tarseq_606_000001.gene2056
SIN_1021494	354	AT1G72820.1	tarseq_5663_000002.gene18390	tarseq_606_000001.gene2057
SIN_1021495	83	NA	NA	tarseq_606_000001.gene2058
SIN_1021496	155	AT5G12020.1	tarseq_1085_000003.gene3105	tarseq_606_000001.gene2059
SIN_1021497	168	AT5G26170.1	tarseq_10200_000002.gene25377	tarseq_606_000001.gene2060
SIN_1021498	1650	AT1G72770.1	tarseq_10200_000002.gene25375	tarseq_606_000001.gene2061
SIN_1021499	142	AT5G08290.1	tarseq_10200_000002.gene25374	tarseq_606_000001.gene2063
SIN_1021500	216	AT5G58590.1	tarseq_10200_000002.gene25373	tarseq_606_000001.gene2064
SIN_1021501	523	AT4G33080.1	tarseq_10200_000002.gene25372	tarseq_606_000001.gene2065
SIN_1021502	265	AT1G76940.1	tarseq_10200_000002.gene25371	tarseq_606_000001.gene2066
SIN_1021503	494	AT5G12010.1	tarseq_10200_000002.gene25370	tarseq_606_000001.gene2067
SIN_1021504	664	AT5G12000.1	tarseq_10200_000002.gene25369	tarseq_606_000001.gene2068
SIN_1021505	206	NA	NA	NA
SIN_1021506	460	AT3G13920.1	NA	NA
SIN_1021507	122	AT5G11970.1	tarseq_1085_000002.gene3089	tarseq_606_000002.gene2071
SIN_1021508	445	AT3G04680.1	tarseq_10200_000002.gene25365	tarseq_606_000002.gene2072
SIN_1021509	216	AT5G11950.1	tarseq_10200_000002.gene25364	tarseq_606_000002.gene2073
SIN_1021510	216	NA	tarseq_10200_000002.gene25363	tarseq_606_000002.gene2074
SIN_1021511	343	AT1G14560.1	tarseq_10200_000002.gene25361	tarseq_606_000002.gene2075
SIN_1021512	420	AT2G26150.1	tarseq_10200_000002.gene25360	tarseq_606_000002.gene2076
SIN_1021513	115	AT5G11930.1	tarseq_10200_000001.gene25359	tarseq_606_000005.gene2077
SIN_1021514	330	AT5G56450.1	tarseq_10200_000001.gene25358	tarseq_606_000005.gene2078
SIN_1021515	642	AT2G26140.1	NA	NA
SIN_1021516	717	AT2G26140.1	tarseq_10189_000001.gene25347	tarseq_9497_000002.gene23871
SIN_1021517	482	AT4G33030.1	tarseq_10189_000001.gene25346	tarseq_9497_000002.gene23870
SIN_1021518	447	AT2G46210.1	tarseq_10189_000001.gene25345	tarseq_9497_000002.gene23869
SIN_1021519	257	AT5G11890.1	tarseq_10189_000001.gene25344	tarseq_9497_000002.gene23868
SIN_1021520	304	AT2G26110.1	tarseq_10851_000001.gene26413	tarseq_9497_000002.gene23867
SIN_1021521	134	NA	tarseq_4471_000001.gene15973	NA
SIN_1021522	1095	AT2G26080.1	tarseq_10851_000001.gene26414	tarseq_9497_000002.gene23866
SIN_1021523	911	AT5G11850.1	tarseq_10851_000001.gene26415	tarseq_9497_000002.gene23865
SIN_1021524	288	AT5G11840.1	tarseq_10851_000001.gene26416	tarseq_9497_000002.gene23864
SIN_1021525	243	AT2G26070.1	NA	NA
SIN_1021526	547	AT4G33000.1	tarseq_10851_000001.gene26417	tarseq_9497_000002.gene23863
SIN_1021527	586	AT2G19600.1	tarseq_10851_000001.gene26418	tarseq_9497_000002.gene23862
SIN_1021528	188	AT2G26040.1	tarseq_17709_000001.gene34700	tarseq_9497_000002.gene23861
SIN_1021529	398	AT4G32980.1	tarseq_17709_000001.gene34699	tarseq_9497_000001.gene23860
SIN_1021530	348	AT5G11790.1	tarseq_17709_000001.gene34698	tarseq_9497_000001.gene23859
SIN_1021531	73	AT5G11770.1	tarseq_13526_000002.gene29559	NA
SIN_1021532	139	AT5G11770.1	tarseq_17709_000001.gene34696	tarseq_9497_000001.gene23857
SIN_1021533	336	AT2G25970.1	NA	NA
SIN_1021534	379	NA	NA	NA
SIN_1021535	469	AT5G26030.1	tarseq_11889_000001.gene27612	tarseq_1655_000002.gene8120
SIN_1021536	491	AT4G32940.1	tarseq_54238_000001.gene38335	tarseq_12729_000001.gene28063
SIN_1021537	291	AT1G55340.1	tarseq_17620_000001.gene34569	tarseq_12729_000001.gene28062
SIN_1021538	379	AT5G11730.1	tarseq_17620_000001.gene34570	tarseq_12729_000001.gene28061
SIN_1021539	166	AT4G32930.1	NA	NA
SIN_1021540	424	AT5G25950.1	tarseq_17620_000001.gene34571	tarseq_12729_000001.gene28060
SIN_1021541	678	AT2G25930.1	tarseq_17620_000001.gene34572	tarseq_12729_000001.gene28059
SIN_1021542	214	AT2G19830.1	tarseq_17620_000001.gene34574	tarseq_12729_000001.gene28057
SIN_1021543	369	AT2G19810.1	tarseq_17620_000002.gene34575	tarseq_12729_000001.gene28056
SIN_1021544	136	AT4G32915.1	NA	NA
SIN_1021545	271	AT4G32830.1	tarseq_7632_000004.gene21647	tarseq_3215_000001.gene12149
SIN_1021546	494	AT4G26270.1	tarseq_17620_000002.gene34577	tarseq_13818_000002.gene29729
SIN_1021547	662	AT5G20170.1	tarseq_10849_000001.gene26412	tarseq_11385_000001.gene26284
SIN_1021548	690	AT4G17616.1	NA	NA
SIN_1021549	997	AT5G25930.1	tarseq_10849_000001.gene26410	tarseq_11385_000001.gene26286
SIN_1021550	313	AT2G25840.1	tarseq_10849_000001.gene26408	tarseq_7104_000001.gene20396
SIN_1021551	532	AT2G25740.1	tarseq_10849_000001.gene26407	tarseq_7104_000001.gene20395
SIN_1021552	590	AT5G25880.1	tarseq_10849_000001.gene26406	tarseq_7104_000001.gene20394
SIN_1021553	239	AT3G18380.1	tarseq_10849_000001.gene26405	tarseq_7104_000001.gene20393
SIN_1021554	714	AT2G25760.1	tarseq_10849_000001.gene26404	tarseq_7104_000001.gene20392
SIN_1021555	352	AT5G25830.1	tarseq_10849_000001.gene26403	tarseq_7104_000001.gene20391
SIN_1021556	92	AT5G11630.1	NA	NA
SIN_1021557	710	AT4G32910.1	tarseq_3616_000001.gene13959	tarseq_10741_000001.gene25418
SIN_1021558	491	AT4G32810.1	tarseq_2957_000001.gene11849	tarseq_4541_000002.gene15391
SIN_1021559	243	AT5G11590.1	tarseq_2957_000002.gene11850	tarseq_3083_000001.gene11883
SIN_1021560	119	NA	NA	NA
SIN_1021561	692	AT4G32790.1	tarseq_2957_000002.gene11851	tarseq_4541_000002.gene15393
SIN_1021562	221	AT2G25810.1	NA	NA
SIN_1021563	536	AT1G52190.1	tarseq_4182_000005.gene15318	tarseq_14847_000001.gene32023
SIN_1021564	328	AT5G11550.1	tarseq_4182_000005.gene15317	tarseq_14847_000001.gene32024
SIN_1021565	585	AT5G11540.1	tarseq_4182_000005.gene15316	tarseq_1347_000004.gene7112
SIN_1021566	984	NA	tarseq_4182_000005.gene15315	tarseq_1347_000004.gene7111
SIN_1021567	487	AT4G29000.1	tarseq_4182_000005.gene15314	tarseq_1347_000004.gene7110
SIN_1021568	668	AT4G32760.1	tarseq_4182_000005.gene15313	tarseq_1347_000004.gene7109
SIN_1021569	277	AT5G25754.1	NA	NA
SIN_1021570	201	AT5G25754.1	NA	NA
SIN_1021571	460	AT5G11520.1	tarseq_4182_000004.gene15311	NA
SIN_1021572	917	AT5G11510.1	tarseq_4182_000004.gene15310	tarseq_1347_000004.gene7107
SIN_1021573	642	AT5G25590.1	tarseq_4182_000004.gene15309	NA
SIN_1021574	333	AT5G25610.1	tarseq_4182_000003.gene15308	tarseq_1347_000004.gene7106
SIN_1021575	431	AT5G25620.1	tarseq_1383_000002.gene7061	tarseq_1347_000004.gene7105
SIN_1021576	262	NA	tarseq_4182_000002.gene15306	tarseq_1347_000001.gene7104
SIN_1021577	97	AT1G15250.1	NA	NA
SIN_1021578	860	AT5G11490.1	tarseq_843_000004.gene2354	tarseq_6848_000001.gene19829
SIN_1021579	217	AT3G24570.1	NA	NA
SIN_1021580	625	AT5G25630.1	tarseq_843_000004.gene2353	tarseq_6848_000001.gene19830
SIN_1021581	91	NA	NA	tarseq_6848_000001.gene19831
SIN_1021582	523	AT5G25560.1	tarseq_843_000004.gene2352	tarseq_6848_000001.gene19832
SIN_1021583	2256	AT4G32620.1	tarseq_843_000004.gene2351	tarseq_6848_000001.gene19833
SIN_1021584	173	AT2G42740.1	NA	NA
SIN_1021585	330	AT3G24350.1	tarseq_843_000004.gene2349	tarseq_6848_000001.gene19835
SIN_1021586	214	AT4G32610.1	tarseq_5360_000001.gene17808	tarseq_6062_000002.gene18374
SIN_1021587	111	NA	NA	NA
SIN_1021588	199	AT5G25540.1	tarseq_843_000004.gene2348	NA
SIN_1021589	1017	AT5G11430.1	tarseq_843_000003.gene2346	tarseq_6848_000001.gene19837
SIN_1021590	405	AT4G32600.1	tarseq_843_000003.gene2345	tarseq_6848_000001.gene19838
SIN_1021591	491	AT5G25510.1	tarseq_843_000003.gene2344	tarseq_6848_000001.gene19839
SIN_1021592	73	NA	NA	NA
SIN_1021593	562	AT3G11830.1	tarseq_843_000002.gene2341	tarseq_6848_000001.gene19842
SIN_1021594	386	AT4G32551.1	tarseq_843_000002.gene2340	tarseq_6848_000001.gene19843
SIN_1021595	401	AT5G11320.1	tarseq_843_000002.gene2339	tarseq_6848_000001.gene19844
SIN_1021596	118	NA	NA	NA
SIN_1021597	165	AT5G11340.1	tarseq_17837_000001.gene34902	tarseq_13251_000002.gene28882
SIN_1021598	509	AT2G26640.1	tarseq_17837_000001.gene34901	tarseq_13251_000002.gene28883
SIN_1021599	135	AT1G52740.1	tarseq_2439_000001.gene10231	tarseq_2400_000001.gene10192
SIN_1021600	663	AT1G15460.1	tarseq_5836_000001.gene18841	tarseq_6617_000001.gene19537
SIN_1021601	909	AT2G26650.1	tarseq_5836_000001.gene18842	tarseq_6617_000001.gene19536
SIN_1021602	369	AT5G11420.1	tarseq_5837_000001.gene18845	tarseq_6614_000001.gene19519
SIN_1021603	325	NA	tarseq_5837_000001.gene18844	tarseq_6614_000001.gene19520
SIN_1021604	735	AT1G15460.1	tarseq_5837_000001.gene18843	tarseq_6614_000001.gene19521
SIN_1021605	198	NA	tarseq_13569_000001.gene29620	tarseq_11734_000001.gene26709
SIN_1021606	220	AT5G55190.1	tarseq_1476_000001.gene7371	tarseq_2400_000001.gene10185
SIN_1021607	438	AT4G32440.2	tarseq_13569_000001.gene29622	tarseq_11734_000001.gene26711
SIN_1021608	373	AT5G25480.1	tarseq_13569_000001.gene29623	tarseq_11734_000001.gene26712
SIN_1021609	833	AT4G32420.1	tarseq_10763_000002.gene26253	NA
SIN_1021610	292	AT5G20060.2	tarseq_13569_000001.gene29624	tarseq_11734_000001.gene26713
SIN_1021611	152	AT3G15680.1	tarseq_10763_000003.gene26258	tarseq_8246_000004.gene22110
SIN_1021612	1662	AT3G43920.2	tarseq_13569_000002.gene29626	tarseq_10434_000001.gene25055
SIN_1021613	450	AT2G26260.1	tarseq_13569_000002.gene29627	tarseq_10434_000001.gene25056
SIN_1021614	176	NA	tarseq_13569_000002.gene29628	tarseq_10434_000001.gene25057
SIN_1021615	358	AT5G21280.1	tarseq_13569_000002.gene29629	tarseq_10434_000001.gene25058
SIN_1021616	313	AT5G20910.1	tarseq_2794_000002.gene11414	tarseq_10434_000001.gene25059
SIN_1021617	374	AT2G25090.1	NA	NA
SIN_1021618	268	AT1G80840.1	tarseq_2794_000002.gene11412	tarseq_10434_000001.gene25061
SIN_1021619	245	AT3G23780.1	NA	NA
SIN_1021620	1083	AT5G62670.1	tarseq_2794_000001.gene11409	tarseq_6856_000001.gene19905
SIN_1021621	632	AT5G22100.1	tarseq_6164_000001.gene19395	tarseq_6856_000001.gene19906
SIN_1021622	255	AT1G80840.1	tarseq_6164_000001.gene19397	tarseq_8246_000001.gene22100
SIN_1021623	1207	AT3G23780.1	tarseq_2794_000002.gene11411	tarseq_10433_000001.gene25054
SIN_1021624	1440	AT1G15520.1	NA	NA
SIN_1021625	99	NA	NA	NA
SIN_1021626	467	AT3G26300.1	tarseq_6164_000001.gene19400	tarseq_8098_000001.gene21880
SIN_1021627	554	AT5G23960.2	tarseq_6164_000001.gene19401	tarseq_8098_000001.gene21879
SIN_1021628	339	AT4G31810.1	NA	NA
SIN_1021629	667	AT5G10840.1	tarseq_2538_000001.gene10750	tarseq_525_000003.gene1816
SIN_1021630	197	AT4G30620.1	tarseq_2538_000001.gene10751	tarseq_525_000003.gene1817
SIN_1021631	319	AT5G07010.1	tarseq_2538_000001.gene10752	tarseq_525_000003.gene1818
SIN_1021632	57	NA	NA	NA
SIN_1021633	319	AT5G07010.1	tarseq_2538_000002.gene10754	tarseq_525_000006.gene1820
SIN_1021634	328	AT5G07010.1	tarseq_2538_000002.gene10757	tarseq_525_000006.gene1823
SIN_1021635	319	AT5G07010.1	tarseq_2538_000002.gene10758	tarseq_525_000006.gene1824
SIN_1021636	291	AT5G07000.1	tarseq_2538_000002.gene10760	tarseq_525_000006.gene1826
SIN_1021637	328	AT5G07010.1	tarseq_2538_000002.gene10761	tarseq_525_000006.gene1827
SIN_1021638	328	AT5G07010.1	tarseq_2538_000002.gene10762	tarseq_12619_000001.gene27919
SIN_1021639	332	AT5G07010.1	tarseq_2538_000002.gene10763	tarseq_8636_000001.gene22784
SIN_1021640	332	AT5G07010.1	tarseq_8313_000001.gene22715	tarseq_4421_000001.gene15132
SIN_1021641	361	AT4G31860.1	tarseq_18236_000001.gene35942	tarseq_13975_000001.gene30022
SIN_1021642	123	NA	NA	NA
SIN_1021643	785	AT5G10820.1	tarseq_1530_000001.gene7473	tarseq_2083_000002.gene9222
SIN_1021644	678	AT5G25060.1	tarseq_1530_000002.gene7474	tarseq_2083_000001.gene9221
SIN_1021645	327	AT1G64290.1	NA	NA
SIN_1021646	461	AT5G10790.1	NA	NA
SIN_1021647	365	AT1G64290.1	tarseq_1530_000001.gene7472	tarseq_2083_000001.gene9220
SIN_1021648	101	AT2G24940.1	tarseq_1530_000002.gene7476	tarseq_2083_000001.gene9219
SIN_1021649	180	AT5G10780.1	tarseq_1530_000002.gene7477	tarseq_2083_000001.gene9218
SIN_1021650	69	NA	NA	NA
SIN_1021651	77	AT2G24860.1	NA	NA
SIN_1021652	495	AT2G24830.1	tarseq_1530_000003.gene7478	tarseq_2083_000001.gene9217
SIN_1021653	56	NA	NA	NA
SIN_1021654	438	AT5G10770.1	tarseq_1530_000003.gene7479	tarseq_2083_000001.gene9216
SIN_1021655	809	AT5G24970.2	tarseq_1530_000003.gene7481	tarseq_2083_000001.gene9214
SIN_1021656	158	AT1G31340.1	tarseq_1413_000001.gene7127	tarseq_2083_000001.gene9213
SIN_1021657	335	AT5G24930.1	tarseq_1530_000003.gene7483	tarseq_2083_000001.gene9212
SIN_1021658	567	AT5G24830.1	tarseq_1530_000003.gene7484	tarseq_2083_000001.gene9211
SIN_1021659	157	NA	tarseq_1530_000003.gene7485	tarseq_2083_000001.gene9210
SIN_1021660	143	NA	tarseq_1530_000003.gene7486	tarseq_2083_000001.gene9209
SIN_1021661	422	AT1G05350.1	tarseq_1530_000003.gene7487	tarseq_2083_000001.gene9208
SIN_1021662	1032	AT5G10720.1	tarseq_1530_000003.gene7488	tarseq_2083_000001.gene9207
SIN_1021663	656	AT2G24640.1	tarseq_17957_000002.gene35159	tarseq_14472_000002.gene30968
SIN_1021664	722	AT2G24610.1	tarseq_17957_000002.gene35158	tarseq_14472_000002.gene30969
SIN_1021665	334	AT4G31550.1	tarseq_18017_000002.gene35285	tarseq_14472_000003.gene30970
SIN_1021666	673	AT4G31540.1	tarseq_18017_000001.gene35284	tarseq_13746_000001.gene29609
SIN_1021667	373	AT5G10690.1	tarseq_18017_000001.gene35283	tarseq_13746_000001.gene29610
SIN_1021668	110	AT5G10690.1	NA	NA
SIN_1021669	440	NA	tarseq_6192_000001.gene19448	tarseq_7013_000001.gene20266
SIN_1021670	282	AT4G31410.1	tarseq_6192_000001.gene19449	tarseq_7013_000001.gene20265
SIN_1021671	361	AT1G71230.1	tarseq_1135_000002.gene6401	tarseq_1345_000003.gene7095
SIN_1021672	60	NA	NA	NA
SIN_1021673	221	AT5G26220.1	tarseq_1135_000002.gene6407	tarseq_1345_000003.gene7101
SIN_1021674	281	AT4G31270.1	NA	tarseq_6503_000001.gene19291
SIN_1021675	625	AT3G20190.1	tarseq_1135_000003.gene6408	tarseq_2187_000002.gene9474
SIN_1021676	164	AT4G31330.1	tarseq_6192_000001.gene19453	tarseq_6503_000001.gene19289
SIN_1021677	308	AT5G24800.1	tarseq_6192_000001.gene19454	tarseq_6503_000001.gene19288
SIN_1021678	162	AT2G24390.1	NA	NA
SIN_1021679	542	AT4G31180.1	tarseq_6192_000001.gene19455	tarseq_6503_000001.gene19287
SIN_1021680	409	AT4G31340.1	tarseq_5956_000001.gene19059	tarseq_6503_000001.gene19286
SIN_1021681	61	NA	tarseq_5956_000001.gene19058	NA
SIN_1021682	628	AT4G31120.2	tarseq_5339_000001.gene17746	tarseq_6503_000001.gene19285
SIN_1021683	838	AT3G49601.1	tarseq_5956_000001.gene19056	tarseq_6503_000001.gene19284
SIN_1021684	397	AT3G04600.1	tarseq_5956_000001.gene19052	tarseq_6503_000001.gene19280
SIN_1021685	417	AT3G19760.1	tarseq_4952_000002.gene16947	tarseq_2203_000003.gene9533
SIN_1021686	392	AT1G31350.1	tarseq_4952_000002.gene16949	tarseq_2203_000003.gene9535
SIN_1021687	333	AT2G38250.1	tarseq_5956_000001.gene19049	tarseq_6503_000001.gene19277
SIN_1021688	68	NA	NA	NA
SIN_1021689	612	AT1G31410.1	tarseq_5956_000001.gene19048	tarseq_6503_000001.gene19276
SIN_1021690	447	AT1G64830.1	tarseq_5956_000001.gene19047	tarseq_12625_000001.gene27929
SIN_1021691	265	NA	tarseq_5956_000001.gene19046	tarseq_12625_000001.gene27930
SIN_1021692	488	AT4G19460.1	tarseq_5956_000001.gene19045	tarseq_12625_000001.gene27931
SIN_1021693	436	AT5G45275.1	tarseq_5956_000001.gene19044	tarseq_12625_000001.gene27932
SIN_1021694	847	AT4G19440.1	tarseq_5956_000001.gene19043	tarseq_12625_000001.gene27933
SIN_1021695	112	NA	tarseq_18185_000001.gene35759	tarseq_14741_000001.gene31640
SIN_1021696	90	NA	tarseq_18185_000001.gene35758	tarseq_14741_000001.gene31639
SIN_1021697	405	AT4G19420.1	tarseq_7480_000002.gene21434	tarseq_169_000001.gene640
SIN_1021698	76	AT4G19400.1	tarseq_8623_000003.gene23153	tarseq_169_000001.gene639
SIN_1021699	98	NA	tarseq_8623_000003.gene23152	tarseq_169_000001.gene638
SIN_1021700	345	AT5G45310.1	tarseq_8623_000003.gene23151	tarseq_169_000001.gene637
SIN_1021701	89	NA	NA	NA
SIN_1021702	139	AT5G04760.1	NA	NA
SIN_1021703	95	NA	NA	NA
SIN_1021704	702	AT4G19380.1	tarseq_8623_000003.gene23149	tarseq_5764_000002.gene17852
SIN_1021705	919	AT1G31730.1	tarseq_8623_000002.gene23146	tarseq_5764_000002.gene17848
SIN_1021706	462	AT4G19230.1	tarseq_8623_000002.gene23145	tarseq_5764_000002.gene17847
SIN_1021707	377	AT5G45360.1	NA	NA
SIN_1021708	1492	AT1G79690.1	tarseq_13909_000002.gene30033	tarseq_14189_000002.gene30455
SIN_1021709	120	AT3G03590.1	tarseq_13909_000002.gene30036	tarseq_14189_000002.gene30457
SIN_1021710	431	AT4G19190.1	tarseq_13909_000002.gene30037	tarseq_14189_000002.gene30458
SIN_1021711	626	AT1G31770.1	tarseq_9584_000001.gene24618	tarseq_10246_000001.gene24919
SIN_1021712	373	AT4G19185.1	tarseq_9584_000001.gene24617	tarseq_10246_000001.gene24920
SIN_1021713	602	AT4G19170.1	tarseq_5597_000001.gene18252	tarseq_4818_000001.gene16040
SIN_1021714	123	NA	tarseq_5597_000001.gene18250	NA
SIN_1021715	652	AT1G12240.1	tarseq_478_000001.gene1414	tarseq_3253_000001.gene12307
SIN_1021716	182	AT1G12260.1	tarseq_478_000002.gene1416	tarseq_3253_000002.gene12310
SIN_1021717	154	AT1G12260.1	NA	tarseq_3253_000002.gene12311
SIN_1021718	165	NA	tarseq_8337_000001.gene22750	tarseq_3253_000002.gene12312
SIN_1021719	479	AT5G21050.1	tarseq_2525_000002.gene10648	tarseq_658_000001.gene2288
SIN_1021720	106	NA	NA	NA
SIN_1021721	518	AT4G12300.1	tarseq_8337_000001.gene22747	tarseq_9129_000001.gene23396
SIN_1021722	113	NA	tarseq_6223_000001.gene19509	NA
SIN_1021723	488	NA	tarseq_1692_000002.gene8102	NA
SIN_1021724	225	NA	tarseq_125_000001.gene410	tarseq_3023_000003.gene11786
SIN_1021725	123	NA	NA	NA
SIN_1021726	1084	AT4G32410.1	tarseq_3220_000002.gene12764	tarseq_385_000002.gene1448
SIN_1021727	122	AT4G32400.1	tarseq_3144_000002.gene12361	tarseq_385_000002.gene1450
SIN_1021728	58	NA	NA	NA
SIN_1021729	587	AT2G25530.1	tarseq_3220_000002.gene12767	tarseq_385_000002.gene1451
SIN_1021730	586	AT4G21065.1	tarseq_3220_000002.gene12768	tarseq_385_000002.gene1452
SIN_1021731	350	AT2G25520.1	tarseq_3220_000002.gene12770	tarseq_385_000002.gene1454
SIN_1021732	502	AT5G11200.1	tarseq_3220_000002.gene12771	tarseq_385_000002.gene1455
SIN_1021733	286	AT2G26660.1	tarseq_3144_000001.gene12355	tarseq_385_000002.gene1456
SIN_1021734	785	AT3G15730.1	tarseq_3220_000002.gene12773	tarseq_385_000002.gene1457
SIN_1021735	59	NA	NA	NA
SIN_1021736	654	AT2G25490.1	tarseq_3220_000002.gene12774	tarseq_385_000002.gene1458
SIN_1021737	484	AT4G32330.1	tarseq_3220_000002.gene12775	tarseq_385_000002.gene1459
SIN_1021738	139	AT4G32320.1	tarseq_3220_000002.gene12776	tarseq_385_000002.gene1460
SIN_1021739	841	AT5G54830.1	tarseq_3220_000002.gene12777	tarseq_385_000002.gene1461
SIN_1021740	319	AT4G32320.1	tarseq_3220_000002.gene12778	tarseq_385_000002.gene1462
SIN_1021741	770	AT4G32300.1	tarseq_3220_000002.gene12779	tarseq_385_000002.gene1463
SIN_1021742	103	NA	NA	NA
SIN_1021743	99	NA	NA	NA
SIN_1021744	599	AT2G25430.1	NA	NA
SIN_1021745	224	NA	NA	NA
SIN_1021746	372	AT1G64150.1	NA	NA
SIN_1021747	483	AT2G25320.1	NA	NA
SIN_1021748	1194	AT2G25320.1	NA	NA
SIN_1021749	1028	AT3G47570.1	tarseq_3220_000003.gene12784	tarseq_385_000002.gene1468
SIN_1021750	66	NA	NA	NA
SIN_1021751	1044	AT5G20280.1	tarseq_3220_000004.gene12786	tarseq_385_000002.gene1470
SIN_1021752	395	AT4G32140.1	tarseq_3220_000004.gene12788	tarseq_385_000002.gene1472
SIN_1021753	428	AT2G25300.1	NA	NA
SIN_1021754	95	NA	NA	NA
SIN_1021755	158	NA	tarseq_3220_000004.gene12789	tarseq_385_000002.gene1473
SIN_1021756	328	AT2G25270.1	tarseq_4407_000001.gene15848	tarseq_778_000001.gene5172
SIN_1021757	746	AT5G25270.1	tarseq_4407_000001.gene15847	tarseq_778_000001.gene5173
SIN_1021758	231	AT5G11060.1	NA	NA
SIN_1021759	1196	AT5G11040.1	tarseq_4235_000001.gene15432	tarseq_778_000001.gene5176
SIN_1021760	271	AT2G32070.1	tarseq_4235_000001.gene15431	tarseq_778_000001.gene5177
SIN_1021761	211	NA	tarseq_4235_000001.gene15430	tarseq_778_000001.gene5178
SIN_1021762	213	AT5G54830.1	tarseq_4235_000001.gene15425	tarseq_778_000001.gene5182
SIN_1021763	402	NA	NA	NA
SIN_1021764	305	AT4G38150.1	tarseq_4235_000001.gene15424	tarseq_778_000001.gene5183
SIN_1021765	248	NA	tarseq_528_000001.gene1568	tarseq_778_000001.gene5184
SIN_1021766	149	NA	NA	NA
SIN_1021767	97	NA	tarseq_1266_000001.gene6721	tarseq_4783_000001.gene15958
SIN_1021768	66	NA	NA	NA
SIN_1026250	294	AT1G12450.1	tarseq_4604_000003.gene16182	tarseq_4082_000001.gene14361
SIN_1026251	194	NA	NA	NA
SIN_1026252	216	NA	tarseq_3478_000001.gene13663	tarseq_1228_000002.gene6649
SIN_1026253	883	AT1G12460.1	tarseq_10574_000002.gene25925	tarseq_10440_000002.gene25064
SIN_1026254	457	AT1G62960.1	tarseq_10574_000002.gene25924	tarseq_10440_000002.gene25063
SIN_1026255	517	NA	tarseq_11447_000001.gene27112	tarseq_11942_000001.gene26995
SIN_1026256	558	AT1G12480.1	tarseq_7854_000001.gene22080	tarseq_8282_000001.gene22194
SIN_1026257	57	NA	tarseq_15448_000001.gene31926	tarseq_7109_000002.gene20413
SIN_1026258	919	AT1G73970.1	tarseq_15448_000001.gene31928	tarseq_7109_000002.gene20415
SIN_1026259	170	AT2G32300.1	tarseq_1461_000001.gene7300	tarseq_4373_000002.gene15032
SIN_1026260	351	AT1G12500.1	NA	NA
SIN_1026261	194	NA	NA	tarseq_4373_000002.gene15029
SIN_1026262	108	NA	tarseq_1461_000001.gene7296	tarseq_4373_000001.gene15027
SIN_1026263	76	NA	NA	NA
SIN_1026264	124	NA	NA	NA
SIN_1026265	430	AT1G66980.1	tarseq_912_000002.gene2495	tarseq_1184_000001.gene6444
SIN_1026266	353	AT1G66980.1	tarseq_1080_000005.gene3079	tarseq_1077_000002.gene6144
SIN_1026267	215	NA	tarseq_1080_000001.gene3074	tarseq_7658_000001.gene21268
SIN_1026268	501	AT2G45570.1	tarseq_1080_000001.gene3073	tarseq_7658_000001.gene21267
SIN_1026269	160	NA	tarseq_4326_000001.gene15636	tarseq_6509_000002.gene19304
SIN_1026270	55	NA	NA	NA
SIN_1026271	80	NA	NA	NA
SIN_1026272	501	AT2G45570.1	NA	tarseq_5882_000001.gene18142
SIN_1026273	254	NA	tarseq_2226_000001.gene9541	tarseq_2884_000001.gene11441
SIN_1026274	350	AT4G10500.1	tarseq_2226_000001.gene9542	tarseq_2884_000001.gene11440
SIN_1026275	75	NA	NA	NA
SIN_1026276	350	AT4G10500.1	tarseq_2226_000001.gene9545	tarseq_2884_000001.gene11437
SIN_1026277	174	NA	NA	NA
SIN_1026278	91	NA	NA	NA
SIN_1026279	501	AT2G45570.1	tarseq_207_000003.gene639	tarseq_674_000001.gene2342
SIN_1026280	84	NA	NA	NA
SIN_1026281	184	NA	NA	NA
SIN_1026282	201	NA	NA	NA
SIN_1026283	308	NA	tarseq_207_000004.gene647	tarseq_674_000001.gene2334
SIN_1026284	117	NA	NA	NA
SIN_1026285	499	AT2G45570.1	tarseq_4626_000001.gene16243	tarseq_1071_000002.gene6114
SIN_1026286	117	NA	NA	tarseq_1071_000002.gene6115
SIN_1026287	129	NA	NA	tarseq_1071_000002.gene6118
SIN_1026288	75	NA	NA	NA
SIN_1026289	349	NA	NA	NA
SIN_1026290	606	AT5G67360.1	tarseq_6477_000001.gene19991	tarseq_5217_000004.gene16794
SIN_1026291	701	AT5G67360.1	tarseq_17886_000001.gene35025	tarseq_14140_000002.gene30362
SIN_1026292	699	AT1G04110.1	tarseq_8466_000001.gene22901	tarseq_7609_000002.gene21180
SIN_1026293	293	NA	tarseq_445_000002.gene1326	tarseq_7609_000002.gene21178
SIN_1026294	67	NA	NA	NA
SIN_1026295	99	NA	tarseq_3465_000002.gene13605	tarseq_7609_000002.gene21175
[truncated: 22,898 more rows]
